# Supplementary material for: Consecutive HDDA and TDDA reactions of silicon-tethered tetraynes for the synthesis of dibenzosilole-fused polycyclic compounds and their unique reactivity
Source: Royal Society of Chemistry journal article supplement (doi:10.1039/c9sc00960d), 2019-01-01
Supplement: c9sc00960d1.pdf [file c9sc00960d1.pdf]

## Supporting Information

### Table of contents

|       |                                                                              |     |
|-------|------------------------------------------------------------------------------|-----|
| i.    | Experimental general information                                             | S2  |
| ii.   | General procedure for consecutive intramolecular DDA under thermal condition | S3  |
| iii.  | Synthetic transformation from sila[5]helicene                                | S3  |
| iv.   | Reaction of carbon analogue tetrayne S1                                      | S3  |
| v.    | Condition screening for the synthesis of 8-memberd ring system               | S3  |
| vi.   | Characterization data for new compounds                                      | S4  |
| vii.  | DFT calculations                                                             | S13 |
| viii. | References                                                                   | S27 |
| ix.   | Copies of $^1\text{H}$ and $^{13}\text{C}$ NMR spectra for new compounds     | S29 |

## i. Experimental General Information

$^1\text{H}$  NMR spectra were recorded on JEOL ECX-500 (500 MHz) spectrometers. The chemical shifts were reported in parts per million ( $\delta$ ) relative to internal standard TMS (0 ppm) for  $\text{CDCl}_3$ . The peak patterns are indicated as follows: s, singlet; d, doublet; dd, doublet of doublet; m, multiplet. The coupling constants,  $J$ , are reported in Hertz (Hz).  $^{13}\text{C}$  NMR spectra were obtained by JEOL ECX-500 (125 MHz) spectrometers and referenced to the internal solvent signals (central peak is 77.16 ppm in  $\text{CDCl}_3$ ).  $\text{CDCl}_3$  was used as an NMR solvent. High-resolution mass spectra (HRMS) were measured on an ESI (Electro Spray Ionization) – Orbitrap mass spectrometer method or positive mode DART.<sup>[1]</sup> Ultraviolet spectrum was measured on a JASCO V-630 spectrometer. Fluorescence spectrum was measured on a JASCO FP-8200 spectrofluorometer. X-ray structures were obtained by a Rigaku R-AXIS RAPID diffractometer. Preparative thin-layer chromatography (PTLC) was performed with silica gel-precoated glass plates (Merck 60 GF254) prepared in our laboratory, Flash column chromatography was performed over silica gel 200-300. All reagents were weighed and handled in air and backfilled under argon at room temperature. Unless otherwise noted, all reactions were performed under an argon atmosphere. All reagents were purchased from Wako, Kanto, Aldrich and TCI and used without further purification.

### Preparation of tetraynes

Tetraynes **1a-1i** were prepared by the literature procedure starting from 1,4-bis(2-bromophenyl)buta-1,3-diyne (**S1**).<sup>[2]</sup> A THF solution of disilylated product **S2** were *in situ* prepared by the dilithiation of **S2** along with quenching with dimethoxydimethylsilane. Then a THF solution of arylethynyllithium, which was prepared from the corresponding terminal alkyne in another pot, was transferred by cannula. Tetraynes **1a-1c** were already reported.<sup>[2]</sup>

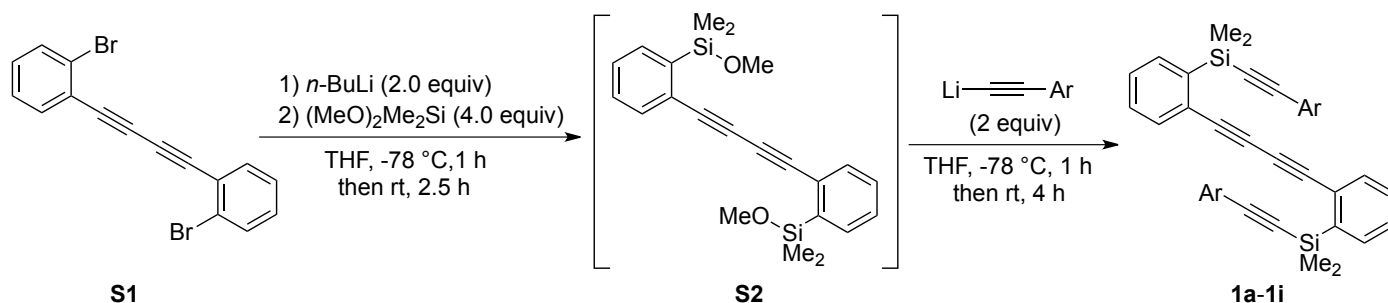

### ii. General procedure for consecutive intramolecular DDA under thermal condition

Tetrayne (0.05 mmol) was placed in a sealed tube, which was then backfilled with argon (x3). To the reaction vessel was added propionitrile (15.0 mL). Then the solution was heated at  $150\text{ }^\circ\text{C}$  for 24-48 h. The reaction mixture was cooled to room temperature and the solvent was evaporated to dryness. The obtained crude products were purified by preparative TLC.

### iii. Synthetic transformation from sila[5]helicene

#### Synthetic transformation into **4**

Cycloadduct **2a** (0.025 mmol) and cesium fluoride (20 equiv) were placed in a sealed tube, which was then backfilled with argon (x3). To a reaction vessel was added 2-(trimethylsilyl)phenyl trifluoromethanesulfonate

(10 equiv) and acetonitrile (0.2 mL). Then, the solution was stirred at 30 °C for 3 h. The reaction mixture was quenched with H<sub>2</sub>O. The aqueous layer was extracted with dichloromethane and the organic layer was dried over Na<sub>2</sub>SO<sub>4</sub>. The dry organic extract was filtered, and evaporated under reduced pressure. After removal of solvent, the crude products were purified by preparative TLC.

#### Synthetic transformation into 5

Cycloadduct **2a** (0.025 mmol) was placed in a sealed tube, which was then backfilled with argon (x3). To a reaction vessel was added dimethylacetylenedicarboxylate (10 equiv) and xylene (0.2 mL). Then, the solution was stirred at 150 °C for 96 h. The reaction mixture was cooled to room temperature and evaporated to dryness. The obtained crude products were purified by preparative TLC.

#### Synthetic transformation into 6

Cycloadduct **2a** (0.025 mmol) was placed in a schlenk tube, which was then backfilled with O<sub>2</sub>. To a reaction vessel was added chloroform (0.25 mL). Then, the solution was stirred at 50 °C for 72 h. The reaction mixture was cooled to room temperature and evaporated to dryness. The obtained crude products were purified by preparative TLC.

#### iv. Reaction of carbon analogue tetrayne S1

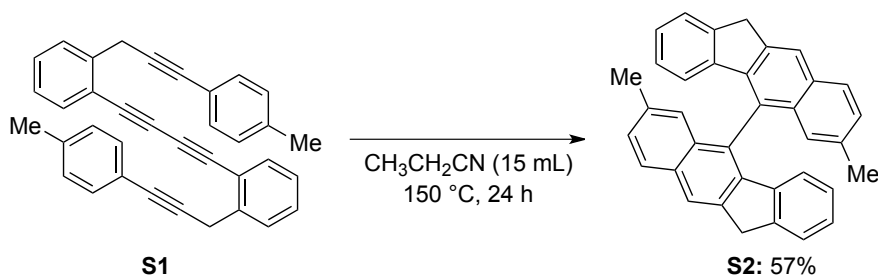

#### v. Condition screening for the synthesis of 8-membered ring system

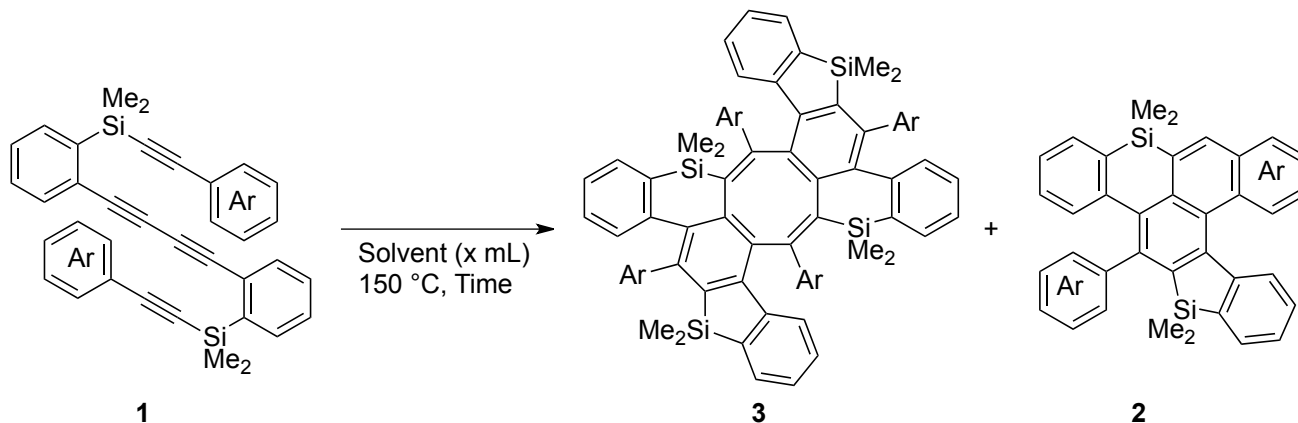

| Comp.     | Solvent       | Solvent (x) | Time / h | NMR Yield of <b>3</b> / % | NMR Yield of <b>2</b> / % |
|-----------|---------------|-------------|----------|---------------------------|---------------------------|
| <b>1a</b> | Dibutyl ether | 0.25        | 24       | 24                        | 18                        |
| ↑         | PhCN          | ↑           | ↑        | 31                        | 40                        |
| ↑         | PhCl          | ↑           | ↑        | 32                        | 13                        |
| <b>1b</b> | ↑             | ↑           | ↑        | 43                        | 11                        |
| ↑         | ↑             | 1.7         | 6        | 39                        | 17                        |
| ↑         | ↑             | 5           | 8        | 53                        | 21                        |

## vi. Characterization data for new compounds

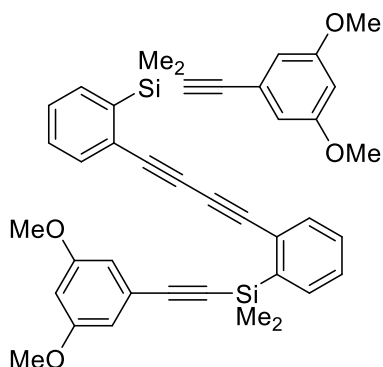

**1,4-Bis(2-(((3,5-dimethoxyphenyl)ethynyl)dimethylsilyl)phenyl)buta-1,3-diyne (1d).** Isolated by column chromatography on silica gel (hexane/ethyl acetate = 20/1 to 5/1). The title compound was obtained as a brown solid (38%). Mp 40-41 °C;  $^1\text{H NMR}$   $\delta$  7.86-7.91 (m, 2H), 7.53-7.57 (m, 2H), 7.34-7.42 (m, 4H), 6.68-6.71 (m, 4H), 6.43-6.46 (m, 2H), 3.75 (s, 12H), 0.63 (s, 12H);  $^{13}\text{C NMR}$   $\delta$  160.6, 140.8, 135.3, 133.5, 129.5, 128.6, 126.8, 124.3, 109.9, 107.5, 102.5, 91.5, 83.5, 77.7, 55.5, -0.7; HRMS (ESI, positive) calcd. for  $\text{C}_{40}\text{H}_{38}\text{NaO}_4\text{Si}_2$   $[\text{M}+\text{Na}]^+$ : 661.2201; found: 661.2197.

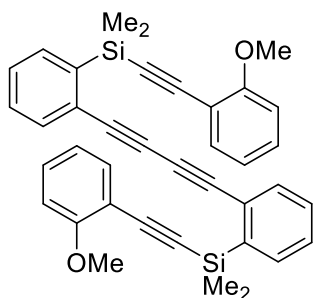

**1,4-Bis(2-(((2-methoxyphenyl)ethynyl)dimethylsilyl)phenyl)buta-1,3-diyne (1e).** Isolated by column chromatography on silica gel (hexane/ethyl acetate = 20/1 to 5/1). The title compound was obtained as a brown solid (32%). Mp 56-57 °C;  $^1\text{H NMR}$   $\delta$  8.10-8.15 (m, 2H), 7.54-7.61 (m, 4H), 7.36-7.46 (m, 4H), 7.29-7.35 (m, 2H), 6.86-6.95 (m, 4H), 3.92 (s, 6H), 0.66 (s, 12H);  $^{13}\text{C NMR}$   $\delta$  160.3, 140.8, 135.4, 133.8, 132.9, 129.9, 128.9, 128.1, 126.3, 120.0, 111.9, 110.4, 103.5, 95.9, 83.1, 55.5, -1.0 (one of alkynyl peaks is overlapped with a chloroform peak); HRMS (ESI, positive) calcd. for  $\text{C}_{38}\text{H}_{34}\text{NaO}_2\text{Si}_2$   $[\text{M}+\text{Na}]^+$ : 601.1990; found: 601.1988.

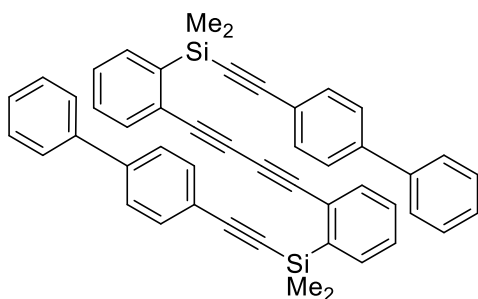

**1,4-Bis(2-(((1,1'-biphenyl)-4-ylethynyl)dimethylsilyl)phenyl)buta-1,3-diyne (1f).** Isolated by recrystallization (dichloromethane). The title compound was obtained as a white solid (43%). Mp 177-178 °C;  $^1\text{H NMR}$   $\delta$  7.91-7.94 (m, 2H), 7.52-7.65 (m, 14H), 7.34-7.47 (m, 10H), 0.66 (s, 12H);  $^{13}\text{C NMR}$   $\delta$  141.4, 140.8,

140.3, 135.3, 133.4, 132.6, 129.4, 128.8, 128.5, 127.7, 127.0, 126.9, 126.7, 121.9, 107.3, 92.6, 83.4, 77.5, -0.8; HRMS (ESI, positive) calcd. for  $C_{48}H_{38}NaSi_2$   $[M+Na]^+$ : 693.2404; found: 693.2399.

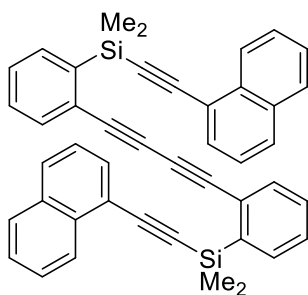

**1,4-Bis(2-(dimethyl(naphthalen-1-ylethynyl)silyl)phenyl)buta-1,3-diyne (1g).** Isolated by preparative TLC (hexane/ethyl acetate = 5/1). The title compound was obtained as brown oil (42%).  $^1H$  NMR  $\delta$  8.41-8.47 (m, 2H), 7.96-8.02 (m, 2H), 7.75-7.80 (m, 6H), 7.50-7.56 (m, 4H), 7.43-7.49 (m, 2H), 7.30-7.40 (m, 6H), 0.74 (s, 12H);  $^{13}C$  NMR  $\delta$  141.4, 136.0, 134.1, 134.1, 133.7, 131.9, 130.1, 129.9, 129.3, 128.9, 127.7, 127.4, 127.1, 127.0, 125.8, 121.3, 106.2, 97.7, 84.2, 78.3, 0.1; HRMS (ESI, positive) calcd. for  $C_{44}H_{34}Si_2$   $[M]^+$ : 618.2194; found: 618.2182.

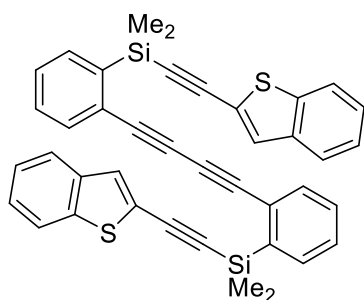

**1,4-Bis(2-((benzo[b]thiophen-2-ylethynyl)dimethylsilyl)phenyl)buta-1,3-diyne (1h).** Isolated by column chromatography on silica gel (hexane/ethyl acetate = 10/1). The title compound was obtained as a yellow solid (16%). Mp 142-143 °C;  $^1H$  NMR  $\delta$  7.86-7.89 (m, 2H), 7.73-7.77 (m, 2H), 7.69-7.72 (m, 2H), 7.54-7.58 (m, 4H), 7.32-7.44 (m, 8H), 0.67 (s, 12H);  $^{13}C$  NMR  $\delta$  140.3, 140.2, 138.8, 135.2, 133.4, 130.0, 129.5, 128.6, 126.7, 125.6, 124.7, 123.9, 122.9, 122.0, 100.0, 98.6, 83.3, 77.6, -0.9; HRMS (ESI, positive) calcd. for  $C_{40}H_{30}NaS_2Si_2$   $[M+Na]^+$ : 653.1220; found: 653.1207.

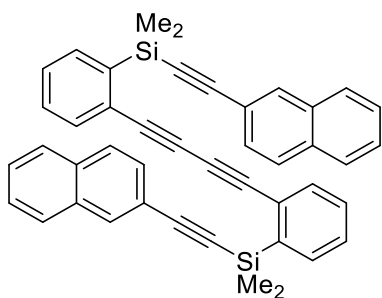

**1,4-Bis(2-(dimethyl(naphthalen-2-ylethynyl)silyl)phenyl)buta-1,3-diyne (1i).** Isolated by column chromatography on silica gel (hexane/toluene = 30/1 to 5/1). The title compound was obtained as a brown

solid (54%). Mp 135-136 °C;  $^1\text{H}$  NMR  $\delta$  8.09 (s, 2H), 7.92-7.96 (m, 2H), 7.72-7.82 (m, 6H), 7.54-7.60 (m, 4H), 7.44-7.51 (m, 4H), 7.34-7.44 (m, 4H), 0.67 (s, 12H);  $^{13}\text{C}$  NMR  $\delta$  140.4, 134.9, 133.1, 132.7, 132.5, 132.0, 129.1, 128.3, 128.2, 127.6, 127.5, 127.4, 126.5, 126.4, 126.2, 120.0, 107.4, 91.9, 83.1, 77.3, -1.0; HRMS (ESI, positive) calcd. for  $\text{C}_{44}\text{H}_{34}\text{NaSi}_2$   $[\text{M}+\text{Na}]^+$ : 641.2091; found: 641.2090.

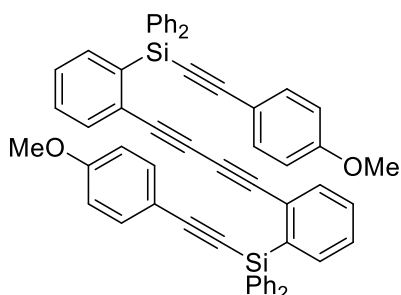

**1,4-Bis(2-(((4-methoxyphenyl)ethynyl)diphenylsilyl)phenyl)buta-1,3-diyne (1j).** Isolated by column chromatography on silica gel (hexane/toluene = 3/1 to 1/3). The title compound was obtained as a pale yellow solid (53%). Mp 159-160 °C;  $^1\text{H}$  NMR  $\delta$  7.67-7.73 (m, 10H), 7.48-7.53 (m, 4H), 7.28-7.43 (m, 18H), 6.73-6.78 (m, 4H), 3.76 (s, 6H);  $^{13}\text{C}$  NMR  $\delta$  160.2, 137.5, 137.0, 135.9, 134.1, 133.3, 129.9, 129.9, 128.4, 128.3, 128.0, 115.2, 113.9, 110.1, 87.6, 83.4, 79.2, 55.4; HRMS (ESI, positive) calcd. for  $\text{C}_{58}\text{H}_{43}\text{O}_2\text{Si}_2$   $[\text{M}+\text{H}]^+$ : 827.2796; found: 827.2789.

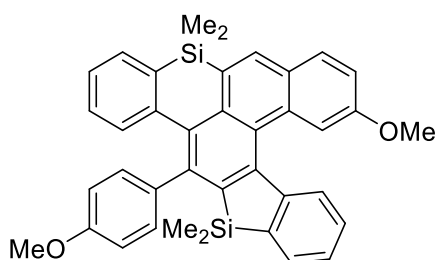

**6-Methoxy-15-(4-methoxyphenyl)-10,10,16,16-tetramethyl-10,16-dihydrobenzo[e]benzo[4',5']silolo[2',3':3,4]phenanthro[10,1-bc]siline (2a).** Isolated by preparative TLC (hexane/toluene = 1/2). The title compound was obtained as a yellow solid (81%). Mp 242-243 °C;  $^1\text{H}$  NMR  $\delta$  8.16 (d,  $J$  = 2.5 Hz, 1H), 8.03-8.09 (m, 1H), 7.88 (s, 1H), 7.73-7.76 (m, 1H), 7.59-7.62 (m, 1H), 7.54-7.58 (m, 1H), 7.21-7.29 (m, 2H), 7.10-7.18 (m, 4H), 7.03-7.10 (m, 1H), 6.85-6.94 (m, 3H), 3.85 (s, 3H), 3.71 (s, 3H), 0.72 (s, 3H), 0.68 (s, 3H), 0.31 (s, 3H), -0.27 (s, 3H);  $^{13}\text{C}$  NMR  $\delta$  158.4, 156.0, 149.4, 144.2, 144.1, 143.1, 142.6, 141.2, 138.3, 137.0, 135.5, 133.6, 132.7, 132.4, 132.1, 132.1, 131.9, 131.6, 129.7, 128.3, 128.2, 127.9, 126.8, 126.6, 126.0, 125.1, 117.6, 113.5, 111.3, 55.3, 55.2, 0.3, -0.2, -4.2, -4.6 (a pair of aromatic peaks is overlapped); HRMS (ESI, positive) calcd. for  $\text{C}_{38}\text{H}_{34}\text{NaO}_2\text{Si}_2$   $[\text{M}+\text{Na}]^+$ : 601.1990; found: 601.1989.

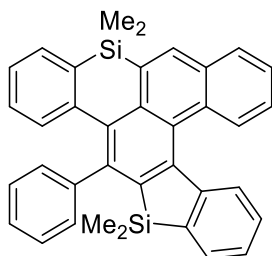

**15-Phenyl-10,10,16,16-tetramethyl-10,16-dihydrobenzo[e]benzo[4',5']silolo[2',3':3,4]phenanthro[10,1-bc]siline (2b).** Isolated by preparative TLC (hexane/toluene = 3/1). The title compound was obtained as a yellow solid (55%). Mp 195-196 °C;  $^1\text{H NMR}$   $\delta$  8.77-8.81 (m, 1H), 8.00-8.04 (m, 1H), 7.93 (s, 1H), 7.81-7.85 (m, 1H), 7.60-7.63 (m, 1H), 7.55-7.58 (m, 1H), 7.50-7.55 (m, 1H), 7.28-7.39 (m, 6H), 7.05-7.19 (m, 4H), 6.85-6.91 (m, 1H), 0.76 (s, 3H), 0.70 (s, 3H), 0.32 (s, 3H), -0.37 (s, 3H);  $^{13}\text{C NMR}$   $\delta$  149.7, 146.0, 144.7, 144.0, 142.9, 141.2, 136.4, 135.5, 133.8, 132.8, 132.7, 132.5, 132.4, 132.3, 131.1, 131.0, 130.5, 129.8, 128.7, 128.6, 128.4, 128.3, 128.1, 127.1, 126.9, 126.9, 126.7, 126.2, 125.4, 124.4, 0.7, 0.2, -0.6, -4.7; HRMS (ESI, positive) calcd. for  $\text{C}_{36}\text{H}_{30}\text{NaSi}_2$   $[\text{M}+\text{Na}]^+$ : 541.1778; found: 541.1780.

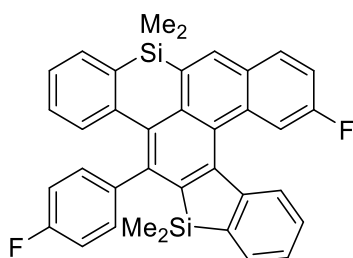

**6-Fluoro-15-(4-fluorophenyl)-10,10,16,16-tetramethyl-10,16-dihydrobenzo[e]benzo[4',5']silolo[2',3':3,4]phenanthro[10,1-bc]siline (2c).** Isolated by preparative TLC (hexane/toluene = 5/1). The title compound was obtained as a yellow solid (51%). Mp 256-257 °C;  $^1\text{H NMR}$   $\delta$  8.37-8.45 (m, 1H), 7.95-8.01 (m, 1H), 7.90 (s, 1H), 7.77-7.84 (m, 1H), 7.55-7.64 (m, 2H), 7.23-7.34 (m, 3H), 7.14-7.22 (m, 2H), 7.00-7.12 (m, 4H), 6.88-6.95 (m, 1H), 0.73 (s, 3H), 0.67 (s, 3H), 0.30 (s, 3H), -0.29 (s, 3H);  $^{13}\text{C NMR}$   $\delta$  163.0, 160.5, 158.1, 148.8, 144.2, 143.8, 142.8, 142.4, 141.7, 141.7, 140.9, 136.7, 135.4, 133.6, 132.7, 132.4, 132.3, 132.2, 132.0, 131.9, 131.9, 131.8, 131.7, 128.9, 128.8, 128.8, 128.1, 127.9, 127.9, 127.8, 127.8, 127.1, 126.0, 125.4, 116.0, 115.8, 115.2, 115.0, 114.8, 114.5, 0.3, -0.1, -4.4, -4.8; HRMS (ESI, positive) calcd. for  $\text{C}_{36}\text{H}_{28}\text{F}_2\text{NaSi}_2$   $[\text{M}+\text{Na}]^+$ : 577.1590; found: 577.1590.

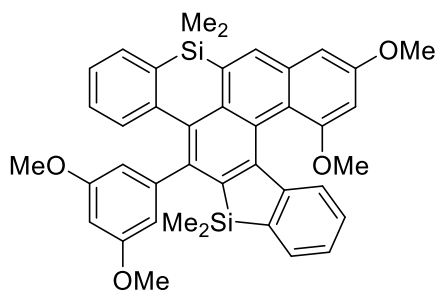

**15-(3,5-Dimethoxyphenyl)-5,7-dimethoxy-10,10,16,16-tetramethyl-10,16-dihydrobenzo[e]benzo[4',5']silolo[2',3':3,4]phenanthro[10,1-bc]siline (2d).** Isolated by preparative TLC

(hexane/toluene = 1/2). The title compound was obtained as a yellow solid (56%). Mp 239-240 °C;  $^1\text{H}$  NMR  $\delta$  7.80 (s, 1H), 7.55-7.60 (m, 2H), 7.49-7.53 (m, 1H), 7.17-7.21 (m, 1H), 7.04-7.13 (m, 3H), 6.91-6.96 (m, 1H), 6.87-6.90 (m, 1H), 6.34-6.64 (m, 3H), 3.99 (s, 3H), 3.73 (brs, 6H), 3.44 (s, 3H), 0.75 (s, 3H), 0.72 (s, 3H), 0.24 (s, 3H), -0.30 (s, 3H) (a proton peak at the aromatic region is missing probably because it is broad);  $^{13}\text{C}$  NMR  $\delta$  160.4, 159.2, 158.4, 151.4, 147.8, 145.7, 143.2, 143.0, 139.2, 138.6, 135.4, 134.3, 134.3, 133.5, 133.0, 132.1, 131.8, 131.3, 131.3, 128.5, 128.2, 126.1, 125.0, 124.1, 122.5, 116.4, 109.6, 98.9, 98.4, 98.3, 55.4, 55.3, 54.4, 0.7, 0.3, -4.8, -5.0; HRMS (ESI, positive) calcd. for  $\text{C}_{40}\text{H}_{38}\text{NaO}_4\text{Si}_2$   $[\text{M}+\text{Na}]^+$ : 661.2201; found: 661.2198.

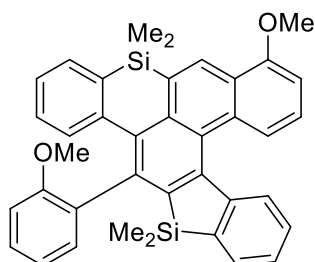

**8-Methoxy-15-(2-methoxyphenyl)-10,10,16,16-tetramethyl-10,16-dihydrobenzo[e]benzo[4',5']silolo[2',3':3,4]phenanthro[10,1-*bc*]siline (2e).** Isolated by preparative TLC (hexane/toluene = 1/1). The title compound was obtained as a yellow solid (52%). Mp 257-258 °C;  $^1\text{H}$  NMR showed the presence of two conformers in a ratio of 1/2,  $\delta$  8.31-8.39 (m, 2H (both)), 8.00-8.05 (m, 1H (both)), 7.57-7.63 (m, 2H (major) + 1H (minor)), 7.52-7.55 (m, 1H (both)), 7.29-7.35 (m, 1H (both)), 6.79-7.26 (m, 8H (major) + 10H (minor)), 6.68-6.72 (m, 1H (major)), 4.06 (s, 3H (both)), 3.88 (s, 3H (minor)), 3.22 (s, 3H (major)), 0.78 (s, 3H (major)), 0.77 (s, 3H (minor)), 0.68 (s, 3H (major)), 0.43 (s, 3H (minor)), 0.26 (s, 3H (both)), -0.36 (s, 3H (minor)), -0.38 (s, 3H (major));  $^{13}\text{C}$  NMR both conformers shown  $\delta$  157.1, 156.4, 155.0, 149.8, 144.5, 143.5, 143.0, 142.9, 142.4, 141.0, 139.4, 135.7, 135.2, 134.6, 134.3, 134.0, 132.8, 131.9, 131.9, 131.7, 131.6, 131.4, 131.0, 128.7, 128.4, 128.2, 127.4, 126.5, 126.4, 126.1, 125.7, 125.5, 125.4, 125.2, 124.1, 124.0, 122.7, 122.5, 122.1, 122.0, 120.4, 120.2, 116.2, 111.5, 109.7, 106.1, 106.0, 106.0, 55.6, 55.1, 54.7, 0.6, 0.2, -2.1, -3.8, -4.7, -5.1, -5.4; HRMS (ESI, positive) calcd. for  $\text{C}_{38}\text{H}_{34}\text{NaO}_2\text{Si}_2$   $[\text{M}+\text{Na}]^+$ : 601.1990; found: 601.1978.

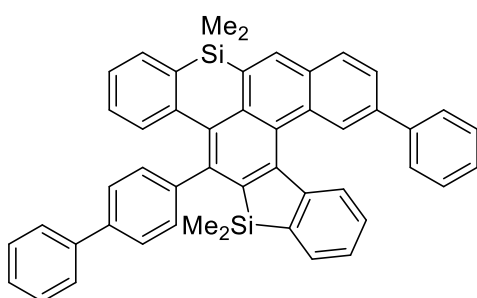

**15-([1,1'-Biphenyl]-4-yl)-10,10,16,16-tetramethyl-6-phenyl-10,16-dihydrobenzo[e]benzo[4',5']silolo[2',3':3,4]phenanthro[10,1-*bc*]siline (2f).** Isolated by preparative TLC (hexane/toluene = 2/1). The title compound was obtained as a yellow solid (43%). Mp 259-260 °C;  $^1\text{H}$  NMR  $\delta$  9.00 (s, 1H), 8.15-8.21 (m, 1H), 7.96 (s, 1H), 7.88-7.92 (m, 1H), 7.75-7.80 (m, 1H), 7.67-7.72 (m, 2H), 7.54-7.66 (m, 6H), 7.27-7.49 (m, 8H), 7.15-7.22 (m, 3H), 7.05-7.10 (m, 1H), 6.86-6.92 (m, 1H), 0.76 (s, 3H), 0.71



(s, 3H), 0.35 (s, 3H), -0.30 (s, 3H);  $^{13}\text{C}$  NMR  $\delta$  149.6, 145.0, 144.3, 144.2, 142.8, 142.8, 141.2, 141.1, 140.6, 139.1, 136.7, 136.6, 135.3, 133.8, 132.9, 132.6, 132.3, 132.3, 132.3, 131.3, 131.3, 130.6, 130.2, 128.8, 128.7, 128.6, 128.6, 128.1, 128.1, 127.4, 127.3, 127.1, 127.0, 126.9, 126.6, 126.2, 125.9, 125.3, 0.6, 0.0, -4.4, -4.7; HRMS (ESI, positive) calcd. for  $\text{C}_{48}\text{H}_{38}\text{NaSi}_2$   $[\text{M}+\text{Na}]^+$ : 693.2404; found: 693.2399.

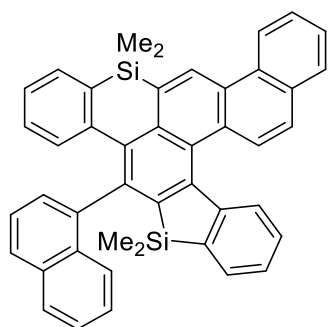

**11-(Naphthalen-1-yl)-6,6,12,12-tetramethyl-6,12-**

**dihydrobenzo[e]benzo[4',5']silolo[2',3':3,4]chryseno[12,1-bc]siline (2g).** Isolated by preparative TLC (hexane/ethylacetate = 5/1). The title compound was obtained as a yellow solid. Mp 200-201 °C ;  $^1\text{H}$  NMR showed the presence of two conformers in a ratio of 1/2,  $\delta$  8.80-8.91 (m, 2H (major) + 3H (minor)), 8.70-8.76 (m, 1H (both)), 7.26-8.00 (m, 13H (both)), 6.98-7.18 (m, 3H (both)), 6.87-6.93 (m, 1H (major)), 6.60-6.68 (m, 2H (both)), 0.88 (s, 3H (major)), 0.83 (s, 3H (minor)), 0.67 (s, 3H (major)), 0.42 (s, 3H (major)), 0.40 (s, 3H (minor)), -0.33 (s, 3H (minor)), -0.42 (s, 3H (minor)), -0.92 (s, 3H (major)) ;  $^{13}\text{C}$  NMR both conformers shown  $\delta$  150.0, 149.8, 145.3, 144.4, 143.5, 143.3, 141.5, 136.5, 135.1, 134.0, 133.9, 133.8, 133.2, 133.1, 132.9, 132.6, 132.2, 132.2, 131.7, 130.1, 129.9, 129.6, 129.4, 129.2, 129.1, 129.1, 129.0, 129.0, 128.7, 128.5, 128.5, 128.4, 128.3, 128.3, 127.8, 127.3, 127.3, 127.1, 127.0, 127.0, 126.7, 126.5, 126.2, 126.2, 126.1, 125.2, 124.8, 123.8, 1.4, 0.9, 0.7, -1.0, -2.9, -3.3, -4.2, -5.0; HRMS (ESI, positive) calcd. for  $\text{C}_{44}\text{H}_{34}\text{Si}_2$  (M): 618.2194 ; found: 618.2182.

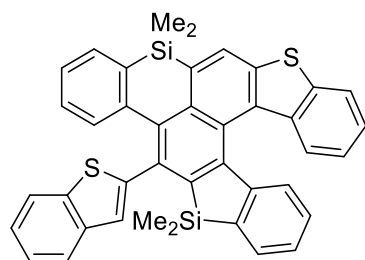

**6-(Benzo[b]thiophen-2-yl)-5,5,11,11-tetramethyl-5,11-**

**dihydrobenzo[b]benzo[4',5']silolo[2',3':7,8]benzo[5',6']silino[2',3',4':4,5]naphtho[1,2-d]thiophene (2h).** Isolated by preparative TLC (hexane/toluene = 3/1). The title compound was obtained as a yellow solid (51%). Mp 206-207 °C;  $^1\text{H}$  NMR  $\delta$  8.14 (s, 1H), 7.90-7.94 (m, 1H), 7.82-7.86 (m, 1H), 7.70-7.77 (m, 2H), 7.65-7.69 (m, 1H), 7.55-7.61 (m, 2H), 7.45 (s, 1H), 7.37-7.42 (m, 1H), 7.29-7.36 (m, 2H), 7.06-7.20 (m, 4H), 6.91-6.96 (m, 1H), 6.84-6.89 (m, 1H), 0.87 (s, 3H), 0.79 (s, 3H), 0.34 (s, 3H), -0.21 (s, 3H);  $^{13}\text{C}$  NMR  $\delta$  148.9, 148.4, 143.7, 143.5, 142.8, 140.9, 139.9, 139.7, 138.5, 137.8, 136.7, 136.0, 134.6, 134.6, 134.4, 134.3, 132.5, 132.3, 131.8, 130.5, 128.8, 128.5, 127.2, 126.6, 126.4, 125.8, 125.2, 124.3, 124.0, 123.5, 122.5, 122.3, 0.5, 0.3, -4.7,

-5.0 (four pairs of aromatic peaks are overlapped); HRMS (ESI, positive) calcd. for  $C_{40}H_{30}S_2Si_2 [M]^+$ : 630.1322; found: 630.1307.

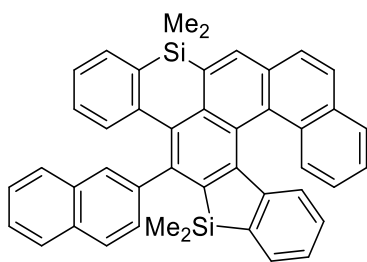

**17-(Naphthalen-2-yl)-12,12,18,18-tetramethyl-12,18-dihydrobenzo[e]benzo[5,6]benzo[4',5']silolo[2',3':3,4]phenanthro[10,1-bc]siline (2i).** Isolated by preparative TLC (hexane/toluene = 3/1). The title compound was obtained as a yellow solid (42%). Mp 286-287 °C;  $^1H$  NMR  $\delta$  8.56 (d,  $J = 8.4$  Hz, 1H), 8.09-8.12 (m, 1H), 8.07 (s, 1H), 7.99 (d,  $J = 8.4$  Hz, 1H), 7.91-7.96 (m, 3H), 7.89 (d,  $J = 8.1$  Hz, 1H), 7.78 (d,  $J = 8.1$  Hz, 1H), 7.64-7.67 (m, 1H), 7.51-7.58 (m, 2H), 7.35-7.46 (m, 3H), 7.24-7.28 (m, 1H), 7.20-7.22 (m, 1H), 7.03-7.06 (m, 1H), 6.90-6.93 (m, 1H), 6.77-6.78 (m, 1H), 6.63 (d,  $J = 8.0$  Hz, 1H), 6.55-6.59 (m, 1H), 0.84 (s, 3H), 0.83 (s, 3H), 0.40 (s, 3H), -0.53 (s, 3H);  $^{13}C$  NMR  $\delta$  148.5, 146.1, 143.8, 142.8, 141.1, 139.9, 137.6, 134.9, 133.8, 133.4, 133.2, 132.4, 132.3, 132.1, 132.0, 131.8, 131.5, 130.6, 130.2, 129.9, 129.4, 129.0, 128.3, 128.1, 128.0, 127.9, 127.9, 127.8, 127.7, 127.0, 126.3, 126.0, 125.9, 125.8, 125.8, 125.7, 125.5, 125.4, 125.2, 0.7, 0.6, -4.6, -5.0 (a pair of aromatic peaks is overlapped); HRMS (ESI, positive) calcd. for  $C_{44}H_{34}NaSi_2 [M+Na]^+$ : 641.2091; found: 641.2080.

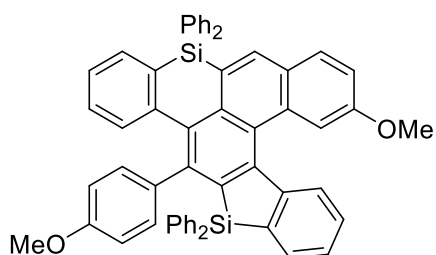

**6-Methoxy-15-(4-methoxyphenyl)-10,10,16,16-tetraphenyl-10,16-dihydrobenzo[e]benzo[4',5']silolo[2',3':3,4]phenanthro[10,1-bc]siline (2j).** Isolated by pipet column (hexane/toluene = 1/1). The title compound was obtained as a yellow solid (47%). Mp 176-177 °C;  $^1H$  NMR  $\delta$  8.15 (d,  $J = 2.4$  Hz, 1H), 7.99-8.02 (m, 1H), 7.97 (s, 1H), 7.69-7.72 (m, 1H), 7.07-7.65 (m, 26H), 6.96-7.01 (m, 1H), 6.85-6.90 (m, 1H), 6.76-6.81 (m, 2H), 6.45-6.49 (m, 2H), 3.72 (s, 3H), 3.65 (s, 3H);  $^{13}C$  NMR  $\delta$  158.5, 156.5, 151.2, 147.0, 145.0, 144.9, 140.7, 138.6, 138.4, 137.6, 136.9, 136.4, 136.0, 135.9, 135.9, 134.7, 134.5, 134.4, 134.1, 133.9, 133.5, 133.0, 132.9, 132.7, 132.1, 129.9, 129.9, 129.8, 129.2, 128.8, 128.5, 128.1, 128.0, 128.0, 127.7, 127.4, 126.9, 126.6, 125.4, 125.2, 117.7, 113.5, 111.8, 55.4, 55.3; HRMS (ESI, positive) calcd. for  $C_{58}H_{42}O_2NaSi_2 [M+Na]^+$ : 849.2616; found: 849.2620.

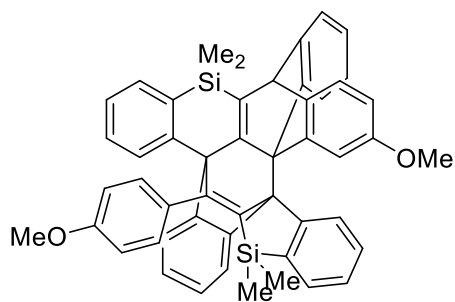

**6-Methoxy-15-(4-methoxyphenyl)-10,10,16,16-tetramethyl-9H,10H,16H-4b,14b:4c,9-bis([1,2]benzeno)benzo[e]benzo[4',5']silolo[2',3':3,4]phenanthro[10,1-*bc*]siline (4).** Isolated by preparative TLC (hexane/toluene = 1/1). The title compound was obtained as a yellow solid (58%). Mp 148-149 °C;  $^1\text{H NMR}$   $\delta$  8.51 (d,  $J = 7.4$  Hz, 1H), 7.83-7.87 (m, 1H), 7.45-7.54 (m, 3H), 7.34-7.42 (m, 2H), 7.04-7.20 (m, 5H), 6.88-7.02 (m, 3H), 6.71-6.77 (m, 1H), 6.62-6.70 (m, 2H), 6.34-6.51 (m, 5H), 5.15 (s, 1H), 3.61 (s, 3H), 3.24 (s, 3H), 0.35 (s, 3H), 0.28 (s, 3H), 0.21 (s, 3H), -0.08 (s, 3H);  $^{13}\text{C NMR}$   $\delta$  163.5, 159.2, 157.6, 155.8, 150.9, 150.3, 148.5, 147.2, 146.0, 145.9, 144.4, 143.7, 143.3, 138.9, 134.9, 134.7, 133.5, 132.8, 130.7, 130.2, 129.5, 129.0, 128.2, 127.3, 127.1, 125.8, 125.3, 125.2, 124.9, 124.7, 123.3, 122.8, 122.2, 121.6, 121.4, 112.4, 112.2, 109.5, 68.0, 65.0, 61.5, 55.3, 54.9, 53.3, 2.4, -1.5, -2.3, -3.2; HRMS (ESI, positive) calcd. for  $\text{C}_{50}\text{H}_{42}\text{O}_2\text{Si}_2$   $[\text{M}]^+$ : 730.2723; found: 730.3035.

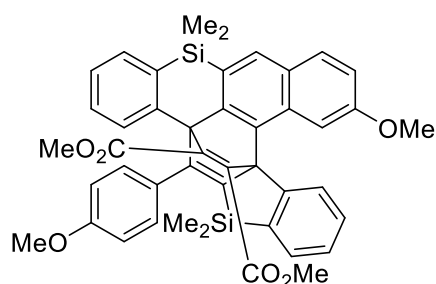

**6-Methoxy-15-(4-methoxyphenyl)-10,10,16,16-tetramethyl-17,18-bis(methoxycarbonyl)-10H,16H-4b,14b-ethenobenzo[e]benzo[4',5']silolo[2',3':3,4]phenanthro[10,1-*bc*]siline (5).** Isolated by preparative TLC (hexane/ethylacetate = 5/1). The title compound was obtained as a yellow solid (38%). Mp 82-83 °C;  $^1\text{H NMR}$   $\delta$  8.05-8.09 (m, 1H), 8.00 (s, 1H), 7.68-7.78 (m, 2H), 7.36-7.54 (m, 7H), 7.04-7.11 (m, 3H), 6.65-6.70 (m, 2H), 3.76 (s, 3H), 3.61 (s, 3H), 3.47 (s, 3H), 3.24 (s, 3H), 0.61 (s, 3H), 0.47 (s, 3H), 0.01 (s, 3H), -0.43 (s, 3H);  $^{13}\text{C NMR}$   $\delta$  171.0, 169.5, 160.1, 158.5, 146.9, 144.4, 139.0, 138.0, 136.9, 136.2, 135.6, 134.0, 133.8, 133.3, 133.1, 131.3, 130.7, 130.3, 130.1, 129.9, 129.8, 129.7, 128.3, 128.0, 127.9, 127.7, 119.1, 115.5, 114.1, 114.1, 110.0, 106.7, 92.1, 55.7, 55.3, 53.1, 52.5, 0.1, -1.1, -1.9, -2.8; HRMS (ESI, positive) calcd. for  $\text{C}_{44}\text{H}_{40}\text{NaO}_6\text{Si}_2$   $[\text{M}+\text{Na}]^+$ : 743.2256; found: 743.2250.

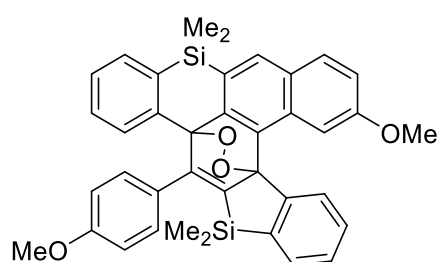

**6-Methoxy-15-(4-methoxyphenyl)-10,10,16,16-tetramethyl-10*H*,16*H*-4b,14b-**

**epidioxybenzo[*e*]benzo[4',5']silolo[2',3':3,4]phenanthro[10,1-*bc*]siline (6).** Isolated by preparative TLC (toluene). The title compound was obtained as a yellow solid (48%). Mp 222-223 °C; <sup>1</sup>H NMR δ 8.02 (s, 1H), 7.85 (d, *J* = 7.7 Hz, 2H), 7.77-7.81 (m, 1H), 7.73 (d, *J* = 8.9 Hz, 1H), 7.59-7.63 (m, 2H), 7.53-7.57 (m, 1H), 7.37 (d, *J* = 7.8 Hz, 1H), 7.24-7.28 (m, 1H), 7.10-7.14 (m, 1H), 6.97 (dd, *J* = 9.0 Hz, 2.4 Hz, 1H), 6.79 (d, *J* = 8.9, 2H), 6.58 (d, *J* = 8.9, 2H), 3.70 (s, 3H), 3.20 (s, 3H), 0.66 (s, 3H), 0.62 (s, 3H), 0.56 (s, 3H), -0.11 (s, 3H); <sup>13</sup>C NMR δ 162.9, 158.5, 157.4, 147.5, 145.9, 143.9, 142.3, 139.4, 138.7, 135.2, 133.3, 132.9, 132.9, 132.8, 132.1, 130.6, 130.2, 130.2, 129.7, 129.6, 129.0, 128.9, 128.1, 127.9, 124.8, 118.9, 112.9, 103.1, 91.4, 84.8, 55.1, 54.4, 1.5, 0.5, -0.7, -1.9; HRMS (ESI, positive) calcd. for C<sub>38</sub>H<sub>34</sub>NaO<sub>4</sub>Si<sub>2</sub> (M+Na): 633.1888; found: 633.1884.

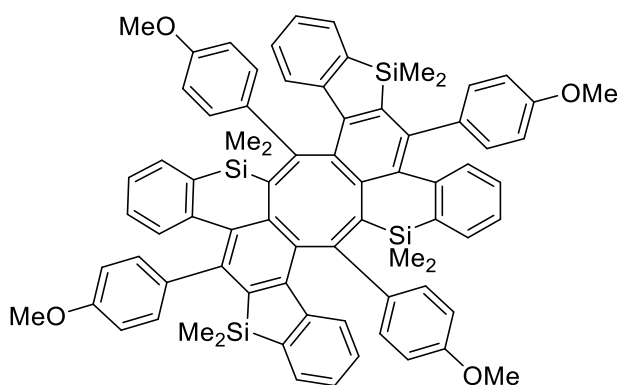

**(8*aE*, 17*aZ*)-Bis((1, 1-dimethyl-1*H*-benzo[*b*]siloleno)[2,3-*h*:2',3'-*h*'])-3,9,12,18-**

**tetrakis(4-methoxyphenyl)-8,8,17,17-tetramethyl-8,17-dihydro-8,17-disilacycloocta[1,2,3-*jk*:5,6,7-*j'**k'*]diphenanthrene (3a).** Isolated by preparative TLC (hexane/toluene = 1/2). The title compound was obtained as an orange solid (32%). Mp > 280 °C; <sup>1</sup>H NMR δ 7.49-7.56 (m, 4H), 7.45 (d, *J* = 7.3 Hz, 2H), 7.35 (d, *J* = 7.3 Hz, 2H), 7.11 (d, *J* = 8.7 Hz, 4H), 7.03-7.08 (m, 2H), 6.92 (dd, *J* = 2.6, 8.4 Hz, 2H), 6.79-6.89 (m, 4H), 6.73-6.78 (m, 2H), 6.70 (d, *J* = 8.7 Hz, 4H), 6.54 (dd, *J* = 2.6, 8.4 Hz, 2H), 6.43 (dd, *J* = 2.0, 8.6 Hz, 2H), 6.06-6.12 (m, 2H), 3.77 (s, 6H), 3.76 (s, 6H), 0.38 (s, 6H), 0.10 (s, 6H), -0.33 (s, 6H), -0.43 (s, 6H); <sup>13</sup>C NMR δ 159.1, 158.0, 152.7, 149.1, 145.2, 144.6, 144.1, 143.9, 141.6, 141.1, 140.1, 138.5, 137.1, 135.4, 134.4, 132.4, 132.2, 132.0, 131.8, 131.6, 131.6, 129.4, 128.4, 126.1, 126.0, 125.4, 113.1, 112.6, 55.2, 55.1, 0.6, -1.9, -3.8, -4.5 (two pair of aromatic peaks are overlapped); HRMS (ESI, positive) calcd. for C<sub>76</sub>H<sub>68</sub>NaO<sub>4</sub>Si<sub>4</sub> [M+Na]<sup>+</sup>: 1179.4087; found: 1179.4088.

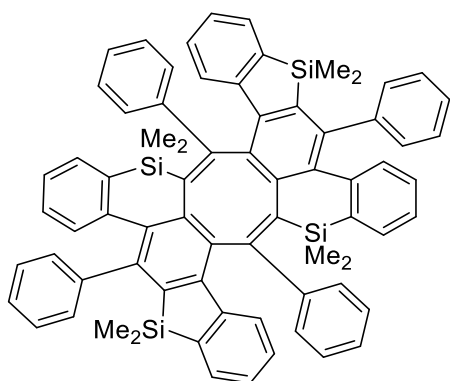

**(8*aE*, 17*aZ*)-Bis((1, 1-dimethyl-1*H*-benzo[*b*]siloleno)[2,3-*h*:2',3'-*h*'])-3,9,12,18-**

**tetraphenyl-8,8,17,17-tetramethyl-8,17-dihydro-8,17-disilacycloocta[1,2,3-*jk*:5,6,7-*j'**k'*]diphenanthrene (3b).** Isolated by preparative TLC (hexane/toluene = 2/1). The title compound was obtained as an orange solid (49%). Mp > 280 °C; <sup>1</sup>H NMR δ 7.60-7.64 (m, 2H), 7.53-7.57 (m, 2H), 7.42-7.46 (m, 2H), 7.34-7.41 (m, 4H), 7.14-7.26 (m, 12H), 7.03-7.08 (m, 2H), 6.95-7.01 (m, 2H), 6.84-6.89 (m, 2H), 6.75-6.83 (m, 4H), 6.50-6.54 (m, 2H), 6.05-6.11 (m, 2H), 0.38 (s, 6H), 0.07 (s, 6H), -0.38 (s, 6H), -0.45 (s, 6H); <sup>13</sup>C NMR δ 153.1, 149.0, 145.8, 144.5, 144.5, 144.0, 144.0, 142.9, 141.6, 140.1, 139.6, 138.3, 135.1, 134.3, 132.3, 132.1, 131.7, 130.9, 130.6, 130.4, 129.4, 128.4, 127.6, 127.5, 127.4, 127.3, 126.3, 126.2, 126.0, 125.7, 0.7, -2.0, -4.0, -4.7; HRMS (ESI, positive) calcd. for C<sub>72</sub>H<sub>60</sub>NaSi<sub>4</sub> [M+Na]<sup>+</sup>: 1059.3664; found: 1059.3661.

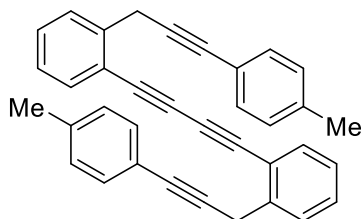

**1,4-Bis(2-(3-(*p*-tolyl)prop-2-yn-1-yl)phenyl)buta-1,3-diyne (S1).** Isolated by column chromatography on silica gel (hexane/toluene = 5/1). The title compound was obtained as a pale yellow solid (47%). Mp 140-141 °C; <sup>1</sup>H NMR δ 7.69 (d, *J* = 7.7 Hz, 2H), 7.55 (dd, *J* = 1.2, 7.7 Hz, 2H), 7.35-7.42 (m, 6H), 7.23-7.27 (m, 2H), 7.10-7.13 (m, 4H), 4.04 (s, 4H), 2.34 (s, 6H); <sup>13</sup>C NMR δ 140.5, 138.1, 133.2, 131.7, 129.8, 129.2, 128.4, 126.9, 121.0, 120.7, 85.9, 83.6, 80.7, 78.7, 24.9, 21.6; HRMS (NSI, positive) calcd. for C<sub>36</sub>H<sub>30</sub>N [M+NH<sub>4</sub>]<sup>+</sup>: 476.2373; found: 476.2369.

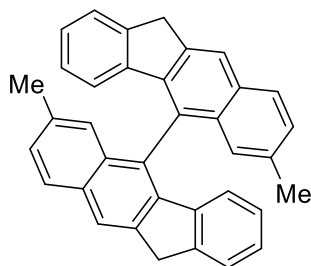

**7,7'-Dimethyl-11*H*,11'*H*-5,5'-bibenzo[*b*]fluorene (S2).** Isolated by preparative TLC (hexane/toluene = 3/1). The title compound was obtained as a yellow solid (57%). Mp 268-269 °C; <sup>1</sup>H NMR δ 8.15 (s, 2H), 7.88-7.92 (m, 2H), 7.40-7.44 (m, 2H), 7.26-7.30 (m, 2H), 7.08 (s, 2H), 7.01-7.06 (m, 2H), 6.66-6.71 (m, 2H), 5.96-6.00 (m, 2H), 4.20 (s, 4H), 2.17 (s, 6H); <sup>13</sup>C NMR δ 144.3, 141.4, 140.9, 138.9, 135.4, 132.9, 131.6, 129.2, 128.2, 127.7, 126.9, 126.8, 125.1, 124.7, 123.4, 123.3, 36.7, 22.0; HRMS (NSI, positive) calcd. for C<sub>36</sub>H<sub>30</sub>N [M+NH<sub>4</sub>]<sup>+</sup>: 476.2373; found: 476.2374.

## vii. DFT calculation

### 1) Theoretical calculation of NICS(0) values for 2a and 6

NICS(0) values were calculated at the GIAO B3LYP/6-311+G(2d,p)//B3LYP/6-31G(d) level of theory using Gaussian 09 program.<sup>[3]</sup> The results of X-ray crystallographic analysis for **2a** and **6** were used for calculations.

## 2) Theoretical calculation of transition states of the modeled reactions

For DFT calculations for energy diagrams were performed at the UB3LYP-D3BJ level of theory,<sup>[4]</sup> using Gaussian 16 program.<sup>[5]</sup> Geometry optimizations was carried out with 6-31+G(d,p). Vibration frequency was computed at the same level of theory to confirm whether the structures are minima (no imaginary frequencies) or transition states (only one imaginary frequency). Energies of optimized structures were calculated by single point calculation at the same level of theory with 6-311++G(2d,2p) and solvation effects (toluene,  $\epsilon = 2.3741$ ) using SMD model.<sup>[6]</sup> All values in the energy diagrams are relative free energies (kcal/mol) at 423.15 K. The molecular geometries of the transition states were first estimated by the Reaction plus pro software package (Software to optimize reaction paths along the user's expected ones, HPC Systems Inc., <http://www.hpc.co.jp/chem/react1.html> (written in Japanese)), based on the nudged elastic band (NEB) method<sup>[7]</sup>, and subsequently re-optimized by the Synchronous Transit-guided Quasi-Newton method with the keyword QST2 or QST3.<sup>[8]</sup> Transition-state structures were confirmed to connect corresponding reactants and products through the use of intrinsic reaction coordination (IRC) calculations.

## 3) Structures optimized at UB3LYP/6-31G+(d,p)

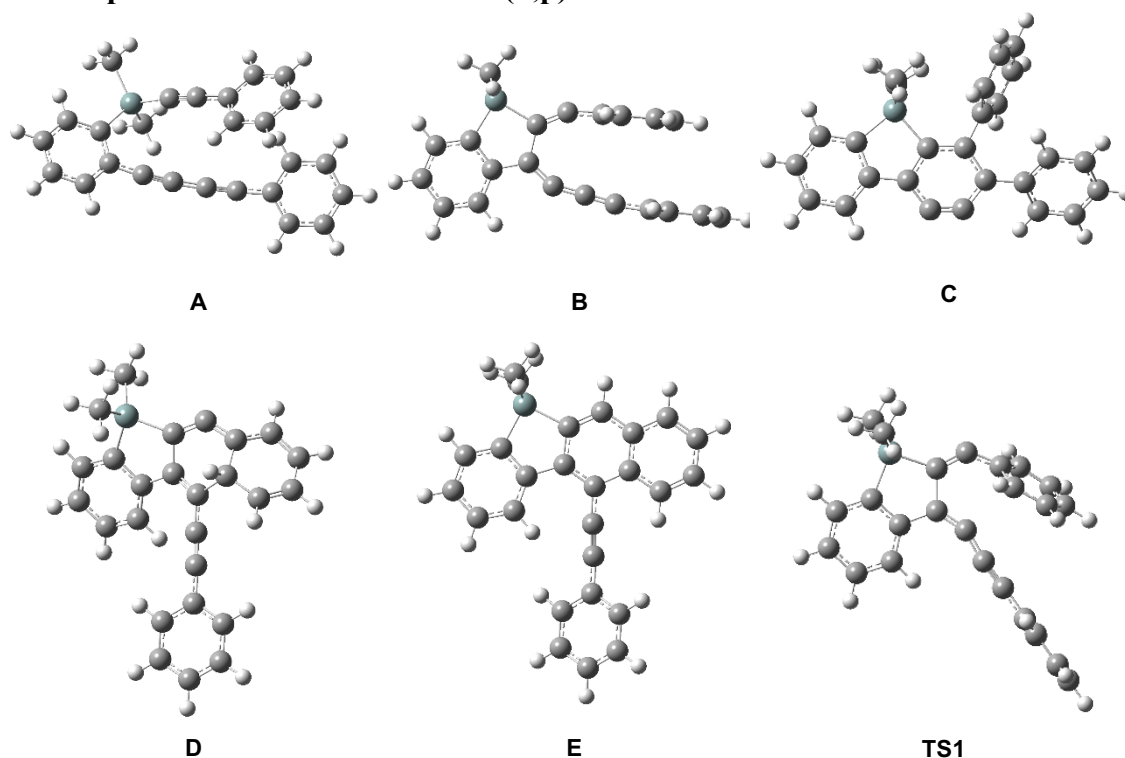

**Figure S1.** Structure optimized at UB3LYP/6-31G+(d,p). The hydrogen atom colored in white, the carbon atoms in gray, the silicon atom in skyblue.

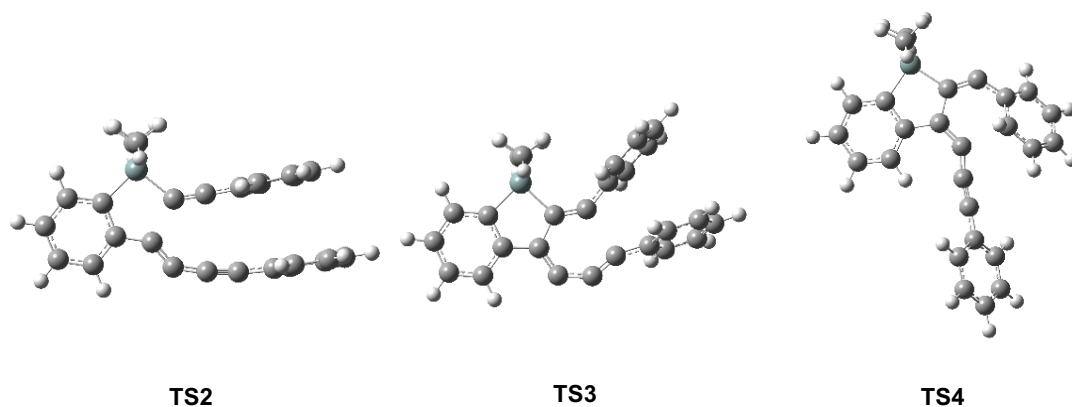

**Figure S1 (Cont.)** Structure optimized at UB3LYP/6-31G+(d,p). The hydrogen atom colored in white, the carbon atoms in gray, the silicon atom in skyblue.

**4) Total electronic energy and free energy with solvation effects (toluene,  $\epsilon = 2.3741$ ) using SMD model**

|            | E (Hartree)  | S (cal/mol) | G (Hartree)  |
|------------|--------------|-------------|--------------|
| <b>A</b>   | -1292.649794 | 178.486     | -1292.375207 |
| <b>B</b>   | -1292.605218 | 179.47      | -1292.334094 |
| <b>C</b>   | -1292.696129 | 163.375     | -1292.410412 |
| <b>D</b>   | -1292.618574 | 169.342     | -1292.338451 |
| <b>E</b>   | -1292.767548 | 167.467     | -1292.483636 |
| <b>TS1</b> | -1292.593001 | 172.772     | -1292.317582 |
| <b>TS2</b> | -1292.606593 | 174.357     | -1292.332288 |
| <b>TS3</b> | -1292.563804 | 172.629     | -1292.28872  |
| <b>TS4</b> | -1292.71303  | 173.313     | -1292.297075 |

**5) Cartesian coordinates of optimized structures**

**A (NIMG = 0)**

| Center Number | Atomic Number | Atomic Type | Coordinates (Angstroms) |           |           |
|---------------|---------------|-------------|-------------------------|-----------|-----------|
|               |               |             | X                       | Y         | Z         |
| 1             | 6             | 0           | 5.942659                | -0.830489 | -1.039916 |
| 2             | 6             | 0           | 5.353314                | -1.980507 | -1.568991 |
| 3             | 6             | 0           | 4.009657                | -2.247035 | -1.320554 |
| 4             | 6             | 0           | 3.241319                | -1.365127 | -0.535941 |
| 5             | 6             | 0           | 3.828721                | -0.192987 | 0.017908  |
| 6             | 6             | 0           | 5.182424                | 0.044574  | -0.258282 |
| 7             | 6             | 0           | 1.303001                | 1.495023  | 0.363874  |

|    |    |   |           |           |           |
|----|----|---|-----------|-----------|-----------|
| 8  | 6  | 0 | 0.201169  | 1.743551  | -0.099146 |
| 9  | 6  | 0 | -1.094615 | 1.973258  | -0.649283 |
| 10 | 6  | 0 | -1.936747 | 2.972264  | -0.123433 |
| 11 | 6  | 0 | -3.211695 | 3.166611  | -0.653393 |
| 12 | 6  | 0 | -3.663918 | 2.371426  | -1.710144 |
| 13 | 6  | 0 | -2.833087 | 1.378684  | -2.237806 |
| 14 | 6  | 0 | -1.557878 | 1.177801  | -1.715962 |
| 15 | 6  | 0 | 1.863125  | -1.636898 | -0.318824 |
| 16 | 6  | 0 | 0.663108  | -1.752892 | -0.122755 |
| 17 | 6  | 0 | -0.678450 | -1.786964 | 0.084265  |
| 18 | 6  | 0 | -1.887122 | -1.747245 | 0.257233  |
| 19 | 6  | 0 | -3.288837 | -1.615283 | 0.444715  |
| 20 | 6  | 0 | -3.841761 | -0.343485 | 0.702385  |
| 21 | 6  | 0 | -5.215779 | -0.202199 | 0.874757  |
| 22 | 6  | 0 | -6.056728 | -1.316643 | 0.795913  |
| 23 | 6  | 0 | -5.515495 | -2.580969 | 0.541533  |
| 24 | 6  | 0 | -4.142255 | -2.734629 | 0.366311  |
| 25 | 1  | 0 | 6.989064  | -0.614443 | -1.233543 |
| 26 | 1  | 0 | 5.936756  | -2.666179 | -2.175790 |
| 27 | 1  | 0 | 3.537652  | -3.133512 | -1.731405 |
| 28 | 1  | 0 | 5.661608  | 0.932574  | 0.142763  |
| 29 | 1  | 0 | -1.581497 | 3.584492  | 0.698785  |
| 30 | 1  | 0 | -3.852998 | 3.939168  | -0.239875 |
| 31 | 1  | 0 | -4.659864 | 2.519402  | -2.115822 |
| 32 | 1  | 0 | -3.184554 | 0.750904  | -3.050562 |
| 33 | 1  | 0 | -0.914820 | 0.399313  | -2.109972 |
| 34 | 1  | 0 | -3.187401 | 0.518621  | 0.752327  |
| 35 | 1  | 0 | -5.630897 | 0.782312  | 1.066979  |
| 36 | 1  | 0 | -7.127802 | -1.201268 | 0.931078  |
| 37 | 1  | 0 | -6.165300 | -3.448547 | 0.479585  |
| 38 | 1  | 0 | -3.716469 | -3.712481 | 0.167715  |
| 39 | 14 | 0 | 2.870711  | 0.975985  | 1.158470  |
| 40 | 6  | 0 | 3.914642  | 2.505098  | 1.502398  |
| 41 | 1  | 0 | 4.836269  | 2.251023  | 2.037454  |
| 42 | 1  | 0 | 4.181783  | 3.027759  | 0.578361  |
| 43 | 1  | 0 | 3.346176  | 3.201403  | 2.127952  |
| 44 | 6  | 0 | 2.458061  | 0.086496  | 2.765332  |
| 45 | 1  | 0 | 3.375219  | -0.227361 | 3.276181  |
| 46 | 1  | 0 | 1.896201  | 0.745552  | 3.435781  |
| 47 | 1  | 0 | 1.849923  | -0.801142 | 2.570268  |



-----  
**B (NIMG = 0)**  
-----

| Center<br>Number | Atomic<br>Number | Atomic<br>Type | Coordinates (Angstroms) |           |           |
|------------------|------------------|----------------|-------------------------|-----------|-----------|
|                  |                  |                | X                       | Y         | Z         |
| 1                | 6                | 0              | 0.862716                | 1.464312  | -0.000207 |
| 2                | 6                | 0              | 2.108464                | 1.539122  | -0.000262 |
| 3                | 6                | 0              | -0.450504               | 1.398108  | -0.000144 |
| 4                | 6                | 0              | -1.598513               | 0.720399  | -0.000130 |
| 5                | 6                | 0              | -1.610305               | -0.793076 | -0.000401 |
| 6                | 6                | 0              | -0.524940               | -1.529674 | -0.000597 |
| 7                | 6                | 0              | -4.036320               | 0.399072  | 0.000155  |
| 8                | 6                | 0              | -2.952534               | 1.311408  | 0.000124  |
| 9                | 6                | 0              | -5.343926               | 0.899431  | 0.000395  |
| 10               | 1                | 0              | -6.189036               | 0.215090  | 0.000418  |
| 11               | 6                | 0              | -3.191739               | 2.694218  | 0.000335  |
| 12               | 1                | 0              | -2.352212               | 3.383382  | 0.000307  |
| 13               | 6                | 0              | -5.580140               | 2.275847  | 0.000609  |
| 14               | 1                | 0              | -6.597866               | 2.654897  | 0.000792  |
| 15               | 6                | 0              | -4.500241               | 3.169529  | 0.000576  |
| 16               | 1                | 0              | -4.684474               | 4.239894  | 0.000737  |
| 17               | 6                | 0              | 0.844915                | -1.765835 | -0.000014 |
| 18               | 6                | 0              | 1.569004                | -1.885763 | 1.223855  |
| 19               | 6                | 0              | 1.569988                | -1.886705 | -1.223199 |
| 20               | 6                | 0              | 2.943402                | -2.070173 | 1.212266  |
| 21               | 1                | 0              | 1.029059                | -1.798466 | 2.160666  |
| 22               | 6                | 0              | 2.944380                | -2.071082 | -1.210370 |
| 23               | 1                | 0              | 1.030800                | -1.800148 | -2.160515 |
| 24               | 6                | 0              | 3.644237                | -2.159923 | 0.001263  |
| 25               | 1                | 0              | 3.482384                | -2.130620 | 2.153055  |
| 26               | 1                | 0              | 3.484123                | -2.132231 | -2.150677 |
| 27               | 1                | 0              | 4.722158                | -2.281754 | 0.001744  |
| 28               | 6                | 0              | 3.507678                | 1.432353  | -0.000305 |
| 29               | 6                | 0              | 4.226399                | 1.354422  | 1.218355  |
| 30               | 6                | 0              | 4.226352                | 1.354528  | -1.218999 |
| 31               | 6                | 0              | 5.607063                | 1.194779  | 1.210786  |
| 32               | 1                | 0              | 3.679659                | 1.407826  | 2.153418  |
| 33               | 6                | 0              | 5.607016                | 1.194879  | -1.211495 |

|    |    |   |           |           |           |
|----|----|---|-----------|-----------|-----------|
| 34 | 1  | 0 | 3.679577  | 1.408016  | -2.154038 |
| 35 | 6  | 0 | 6.304873  | 1.111798  | -0.000371 |
| 36 | 1  | 0 | 6.144787  | 1.131965  | 2.152115  |
| 37 | 1  | 0 | 6.144704  | 1.132139  | -2.152850 |
| 38 | 1  | 0 | 7.383106  | 0.986159  | -0.000398 |
| 39 | 14 | 0 | -3.414208 | -1.372479 | -0.000402 |
| 40 | 6  | 0 | -3.870029 | -2.339800 | 1.547751  |
| 41 | 1  | 0 | -4.945138 | -2.550425 | 1.580002  |
| 42 | 1  | 0 | -3.337500 | -3.297068 | 1.574374  |
| 43 | 1  | 0 | -3.605100 | -1.775918 | 2.447449  |
| 44 | 6  | 0 | -3.870639 | -2.338649 | -1.549100 |
| 45 | 1  | 0 | -3.338403 | -3.296054 | -1.576568 |
| 46 | 1  | 0 | -4.945823 | -2.548934 | -1.581165 |
| 47 | 1  | 0 | -3.605837 | -1.774197 | -2.448478 |

-----

C (NIMG = 0)

| Center<br>Number | Atomic<br>Number | Atomic<br>Type | Coordinates (Angstroms) |           |           |
|------------------|------------------|----------------|-------------------------|-----------|-----------|
|                  |                  |                | X                       | Y         | Z         |
| 1                | 6                | 0              | 5.813150                | -0.848858 | 0.126276  |
| 2                | 6                | 0              | 5.324928                | -2.154744 | 0.011705  |
| 3                | 6                | 0              | 3.951374                | -2.389488 | -0.079163 |
| 4                | 6                | 0              | 3.068027                | -1.305960 | -0.054622 |
| 5                | 6                | 0              | 3.547880                | 0.022316  | 0.062198  |
| 6                | 6                | 0              | 4.924659                | 0.233862  | 0.149375  |
| 7                | 6                | 0              | 1.605705                | -1.418172 | -0.130172 |
| 8                | 6                | 0              | 0.850008                | -0.199308 | -0.123971 |
| 9                | 6                | 0              | 0.758166                | -2.515955 | -0.166734 |
| 10               | 6                | 0              | -0.492480               | -2.491726 | -0.159430 |
| 11               | 6                | 0              | -1.344141               | -1.391940 | -0.152145 |
| 12               | 6                | 0              | -0.557972               | -0.182880 | -0.122272 |
| 13               | 6                | 0              | -1.233650               | 1.144368  | 0.003083  |
| 14               | 6                | 0              | -2.818835               | -1.479836 | -0.136075 |
| 15               | 6                | 0              | -1.910337               | 1.482158  | 1.183342  |
| 16               | 6                | 0              | -2.513544               | 2.731980  | 1.322310  |
| 17               | 6                | 0              | -2.452685               | 3.661719  | 0.279964  |
| 18               | 6                | 0              | -1.784853               | 3.331666  | -0.901696 |
| 19               | 6                | 0              | -1.179491               | 2.080440  | -1.037854 |

|    |    |   |           |           |           |
|----|----|---|-----------|-----------|-----------|
| 20 | 6  | 0 | -3.647174 | -0.563713 | -0.805829 |
| 21 | 6  | 0 | -5.034234 | -0.704859 | -0.772889 |
| 22 | 6  | 0 | -5.622474 | -1.760798 | -0.072627 |
| 23 | 6  | 0 | -4.808529 | -2.686125 | 0.586802  |
| 24 | 6  | 0 | -3.422282 | -2.548445 | 0.550402  |
| 25 | 1  | 0 | 6.882901  | -0.675513 | 0.197261  |
| 26 | 1  | 0 | 6.017228  | -2.991223 | -0.006913 |
| 27 | 1  | 0 | 3.566004  | -3.401416 | -0.168589 |
| 28 | 1  | 0 | 5.319817  | 1.243168  | 0.237823  |
| 29 | 1  | 0 | -1.960219 | 0.757821  | 1.990158  |
| 30 | 1  | 0 | -3.031443 | 2.980399  | 2.243777  |
| 31 | 1  | 0 | -2.923473 | 4.634066  | 0.387657  |
| 32 | 1  | 0 | -1.737350 | 4.045210  | -1.719069 |
| 33 | 1  | 0 | -0.671427 | 1.817160  | -1.959924 |
| 34 | 1  | 0 | -3.208838 | 0.254620  | -1.362587 |
| 35 | 1  | 0 | -5.656121 | 0.011469  | -1.301359 |
| 36 | 1  | 0 | -6.702837 | -1.865671 | -0.046509 |
| 37 | 1  | 0 | -5.253012 | -3.515193 | 1.129281  |
| 38 | 1  | 0 | -2.789206 | -3.267627 | 1.061846  |
| 39 | 14 | 0 | 2.093534  | 1.223939  | 0.029397  |
| 40 | 6  | 0 | 2.222110  | 2.378853  | -1.453869 |
| 41 | 1  | 0 | 3.180197  | 2.910712  | -1.419613 |
| 42 | 1  | 0 | 2.184149  | 1.818293  | -2.393258 |
| 43 | 1  | 0 | 1.420764  | 3.122707  | -1.455966 |
| 44 | 6  | 0 | 1.860458  | 2.203618  | 1.617914  |
| 45 | 1  | 0 | 0.920656  | 2.764473  | 1.583596  |
| 46 | 1  | 0 | 1.829513  | 1.536313  | 2.484664  |
| 47 | 1  | 0 | 2.680498  | 2.916055  | 1.762014  |

-----

**D (NIMG = 0)**

-----

| Center<br>Number | Atomic<br>Number | Atomic<br>Type | Coordinates (Angstroms) |           |           |
|------------------|------------------|----------------|-------------------------|-----------|-----------|
|                  |                  |                | X                       | Y         | Z         |
| 1                | 6                | 0              | 1.281031                | 0.441819  | 0.137412  |
| 2                | 6                | 0              | -0.044047               | 0.902370  | 0.106452  |
| 3                | 6                | 0              | -1.130659               | 0.116704  | -0.158351 |
| 4                | 6                | 0              | -2.492827               | 0.680384  | 0.164833  |
| 5                | 6                | 0              | -1.170823               | -1.323437 | -0.482923 |

|    |    |   |           |           |           |
|----|----|---|-----------|-----------|-----------|
| 6  | 6  | 0 | 2.449884  | 0.094151  | 0.190712  |
| 7  | 6  | 0 | -2.551362 | 2.005910  | 0.086034  |
| 8  | 6  | 0 | -2.398226 | -1.971012 | -0.168766 |
| 9  | 6  | 0 | -0.289283 | -3.417908 | -1.322219 |
| 10 | 6  | 0 | -0.124331 | -2.056971 | -1.065085 |
| 11 | 6  | 0 | 3.783735  | -0.392569 | 0.231363  |
| 12 | 6  | 0 | -1.530482 | 2.888799  | -0.042345 |
| 13 | 6  | 0 | -2.533558 | -3.338414 | -0.423904 |
| 14 | 1  | 0 | 0.802889  | -1.564710 | -1.330391 |
| 15 | 1  | 0 | -0.419002 | 2.232662  | 1.715189  |
| 16 | 6  | 0 | 0.905466  | 3.303260  | 0.465762  |
| 17 | 1  | 0 | -2.369736 | 4.225283  | -1.524617 |
| 18 | 6  | 0 | -0.303379 | 4.652722  | -1.170760 |
| 19 | 1  | 0 | 4.693543  | 1.563403  | 0.250620  |
| 20 | 1  | 0 | 7.017405  | 0.695757  | 0.319448  |
| 21 | 6  | 0 | 0.881437  | 4.339258  | -0.398977 |
| 22 | 6  | 0 | 6.181968  | 0.002576  | 0.297055  |
| 23 | 1  | 0 | 3.187821  | -2.466034 | 0.224456  |
| 24 | 6  | 0 | 4.879576  | 0.494610  | 0.260998  |
| 25 | 6  | 0 | 5.336138  | -2.264191 | 0.271758  |
| 26 | 6  | 0 | -1.486142 | -4.065170 | -0.997452 |
| 27 | 1  | 0 | -3.463659 | -3.847567 | -0.182208 |
| 28 | 6  | 0 | -0.269679 | 2.389149  | 0.635505  |
| 29 | 1  | 0 | -1.603226 | -5.125926 | -1.199076 |
| 30 | 6  | 0 | 6.416248  | -1.376149 | 0.301641  |
| 31 | 6  | 0 | -1.468536 | 3.970858  | -0.975333 |
| 32 | 6  | 0 | 4.030148  | -1.782260 | 0.238763  |
| 33 | 1  | 0 | 0.519176  | -3.976277 | -1.785439 |
| 34 | 1  | 0 | 5.512977  | -3.335494 | 0.277680  |
| 35 | 1  | 0 | -0.260177 | 5.460980  | -1.894264 |
| 36 | 1  | 0 | 1.775805  | 3.121238  | 1.087872  |
| 37 | 1  | 0 | 7.432925  | -1.755718 | 0.329145  |
| 38 | 1  | 0 | 1.752644  | 4.980010  | -0.501988 |
| 39 | 14 | 0 | -3.635679 | -0.755455 | 0.565436  |
| 40 | 6  | 0 | -3.899328 | -1.013391 | 2.413140  |
| 41 | 1  | 0 | -4.493632 | -0.197545 | 2.839251  |
| 42 | 1  | 0 | -4.427411 | -1.954220 | 2.606255  |
| 43 | 1  | 0 | -2.939565 | -1.048523 | 2.938097  |
| 44 | 6  | 0 | -5.279544 | -0.685317 | -0.344256 |
| 45 | 1  | 0 | -5.850625 | -1.609268 | -0.197903 |

|    |   |   |           |           |           |
|----|---|---|-----------|-----------|-----------|
| 46 | 1 | 0 | -5.887687 | 0.148685  | 0.023209  |
| 47 | 1 | 0 | -5.121501 | -0.545046 | -1.417786 |

-----

**E (NIMG = 0)**

| Center<br>Number | Atomic<br>Number | Atomic<br>Type | Coordinates (Angstroms) |           |           |
|------------------|------------------|----------------|-------------------------|-----------|-----------|
|                  |                  |                | X                       | Y         | Z         |
| 1                | 6                | 0              | 1.188761                | -4.323430 | -0.222580 |
| 2                | 6                | 0              | -0.046265               | -3.679951 | -0.322510 |
| 3                | 6                | 0              | -0.135843               | -2.287379 | -0.271064 |
| 4                | 6                | 0              | 1.020889                | -1.506066 | -0.115473 |
| 5                | 6                | 0              | 2.281728                | -2.163119 | -0.034259 |
| 6                | 6                | 0              | 2.349092                | -3.556351 | -0.084157 |
| 7                | 6                | 0              | 1.083582                | -0.014733 | -0.050898 |
| 8                | 6                | 0              | 2.427489                | 0.501117  | 0.012495  |
| 9                | 6                | 0              | 0.006552                | 0.883430  | -0.041694 |
| 10               | 6                | 0              | 0.255525                | 2.309744  | -0.016129 |
| 11               | 6                | 0              | 1.598862                | 2.793123  | 0.018846  |
| 12               | 6                | 0              | 2.663960                | 1.853068  | 0.044182  |
| 13               | 6                | 0              | -0.799136               | 3.258694  | -0.020596 |
| 14               | 6                | 0              | -0.537569               | 4.613712  | 0.000140  |
| 15               | 6                | 0              | 0.793550                | 5.089529  | 0.030319  |
| 16               | 6                | 0              | 1.838912                | 4.191216  | 0.040771  |
| 17               | 6                | 0              | -1.353270               | 0.469596  | -0.031687 |
| 18               | 6                | 0              | -2.538320               | 0.190855  | -0.001223 |
| 19               | 6                | 0              | -3.898917               | -0.225490 | 0.041297  |
| 20               | 6                | 0              | -4.238225               | -1.479784 | 0.589430  |
| 21               | 6                | 0              | -5.567488               | -1.894195 | 0.626264  |
| 22               | 6                | 0              | -6.578151               | -1.069315 | 0.122936  |
| 23               | 6                | 0              | -6.251127               | 0.177125  | -0.419673 |
| 24               | 6                | 0              | -4.924318               | 0.599316  | -0.462647 |
| 25               | 1                | 0              | 1.247372                | -5.407181 | -0.261647 |
| 26               | 1                | 0              | -0.953414               | -4.264373 | -0.447171 |
| 27               | 1                | 0              | -1.104032               | -1.819997 | -0.363941 |
| 28               | 1                | 0              | 3.313322                | -4.055458 | -0.020607 |
| 29               | 1                | 0              | 3.681962                | 2.235190  | 0.091926  |
| 30               | 1                | 0              | -1.822374               | 2.902761  | -0.040418 |
| 31               | 1                | 0              | -1.361810               | 5.320588  | -0.005449 |

|    |    |   |           |           |           |
|----|----|---|-----------|-----------|-----------|
| 32 | 1  | 0 | 0.987813  | 6.157514  | 0.047048  |
| 33 | 1  | 0 | 2.867644  | 4.540490  | 0.067191  |
| 34 | 1  | 0 | -3.451777 | -2.112630 | 0.987397  |
| 35 | 1  | 0 | -5.816528 | -2.861626 | 1.051680  |
| 36 | 1  | 0 | -7.613242 | -1.394954 | 0.154512  |
| 37 | 1  | 0 | -7.032284 | 0.821222  | -0.811834 |
| 38 | 1  | 0 | -4.666423 | 1.563443  | -0.888128 |
| 39 | 14 | 0 | 3.664766  | -0.907584 | 0.076989  |
| 40 | 6  | 0 | 4.839338  | -0.951899 | -1.395147 |
| 41 | 1  | 0 | 5.532805  | -0.103544 | -1.370704 |
| 42 | 1  | 0 | 5.436157  | -1.871127 | -1.392675 |
| 43 | 1  | 0 | 4.281477  | -0.910056 | -2.335682 |
| 44 | 6  | 0 | 4.631754  | -0.963676 | 1.692888  |
| 45 | 1  | 0 | 5.232399  | -1.877927 | 1.759870  |
| 46 | 1  | 0 | 5.313606  | -0.109201 | 1.771358  |
| 47 | 1  | 0 | 3.952411  | -0.937784 | 2.550454  |

-----

**TS1** (NIMG = 1, 104.50i cm<sup>-1</sup>)

| Center<br>Number | Atomic<br>Number | Atomic<br>Type | Coordinates (Angstroms) |           |           |
|------------------|------------------|----------------|-------------------------|-----------|-----------|
|                  |                  |                | X                       | Y         | Z         |
| 1                | 6                | 0              | -3.281850               | -3.807490 | -0.563702 |
| 2                | 6                | 0              | -1.885900               | -3.777206 | -0.674731 |
| 3                | 6                | 0              | -1.188757               | -2.585009 | -0.494172 |
| 4                | 6                | 0              | -1.891756               | -1.403889 | -0.209068 |
| 5                | 6                | 0              | -3.301956               | -1.422125 | -0.093066 |
| 6                | 6                | 0              | -3.980094               | -2.634238 | -0.270915 |
| 7                | 6                | 0              | -2.281861               | 1.065337  | 0.116524  |
| 8                | 6                | 0              | -1.849426               | 2.289612  | -0.021803 |
| 9                | 6                | 0              | -0.555179               | 2.783486  | -0.088274 |
| 10               | 6                | 0              | 0.002852                | 3.426276  | -1.232155 |
| 11               | 6                | 0              | 1.356215                | 3.675445  | -1.291840 |
| 12               | 6                | 0              | 2.205662                | 3.337383  | -0.205911 |
| 13               | 6                | 0              | 1.689313                | 2.729040  | 0.920962  |
| 14               | 6                | 0              | 0.323689                | 2.383264  | 0.969479  |
| 15               | 6                | 0              | -1.213288               | -0.099527 | 0.001985  |
| 16               | 6                | 0              | 0.074677                | 0.083980  | 0.142813  |
| 17               | 6                | 0              | 1.351843                | -0.319463 | 0.131615  |

|    |    |   |           |           |           |
|----|----|---|-----------|-----------|-----------|
| 18 | 6  | 0 | 2.560361  | -0.566730 | 0.121911  |
| 19 | 6  | 0 | 3.939897  | -0.872416 | 0.117155  |
| 20 | 6  | 0 | 4.677455  | -0.857811 | -1.089203 |
| 21 | 6  | 0 | 6.037008  | -1.154225 | -1.086304 |
| 22 | 6  | 0 | 6.691635  | -1.467685 | 0.109995  |
| 23 | 6  | 0 | 5.972338  | -1.484755 | 1.309644  |
| 24 | 6  | 0 | 4.611461  | -1.192857 | 1.319548  |
| 25 | 1  | 0 | -3.817981 | -4.741479 | -0.704151 |
| 26 | 1  | 0 | -1.340598 | -4.688375 | -0.902695 |
| 27 | 1  | 0 | -0.106918 | -2.563242 | -0.576310 |
| 28 | 1  | 0 | -5.063364 | -2.668598 | -0.181990 |
| 29 | 1  | 0 | -0.654433 | 3.698473  | -2.051155 |
| 30 | 1  | 0 | 1.780455  | 4.143389  | -2.175065 |
| 31 | 1  | 0 | 3.263324  | 3.576133  | -0.260654 |
| 32 | 1  | 0 | 2.335152  | 2.487650  | 1.758700  |
| 33 | 1  | 0 | -0.101518 | 1.982732  | 1.881391  |
| 34 | 1  | 0 | 4.167144  | -0.611352 | -2.014208 |
| 35 | 1  | 0 | 6.590256  | -1.140291 | -2.020554 |
| 36 | 1  | 0 | 7.752486  | -1.697596 | 0.106981  |
| 37 | 1  | 0 | 6.474654  | -1.728963 | 2.240838  |
| 38 | 1  | 0 | 4.049849  | -1.209570 | 2.247599  |
| 39 | 14 | 0 | -3.975211 | 0.280557  | 0.313613  |
| 40 | 6  | 0 | -4.644047 | 0.400963  | 2.069644  |
| 41 | 1  | 0 | -5.560384 | -0.189899 | 2.182088  |
| 42 | 1  | 0 | -3.908391 | 0.028810  | 2.789531  |
| 43 | 1  | 0 | -4.877255 | 1.440719  | 2.324205  |
| 44 | 6  | 0 | -5.230638 | 0.929742  | -0.925743 |
| 45 | 1  | 0 | -6.168896 | 0.366113  | -0.868273 |
| 46 | 1  | 0 | -5.455862 | 1.983256  | -0.727522 |
| 47 | 1  | 0 | -4.842690 | 0.849685  | -1.945663 |

-----

**TS2** (NIMG = 1, 369.24i cm<sup>-1</sup>)

-----

| Center<br>Number | Atomic<br>Number | Atomic<br>Type | Coordinates (Angstroms) |           |           |
|------------------|------------------|----------------|-------------------------|-----------|-----------|
|                  |                  |                | X                       | Y         | Z         |
| 1                | 6                | 0              | 6.101236                | -1.081379 | -0.156838 |
| 2                | 6                | 0              | 5.440072                | -2.308834 | -0.295540 |
| 3                | 6                | 0              | 4.050512                | -2.368930 | -0.274544 |

|    |    |   |           |           |           |
|----|----|---|-----------|-----------|-----------|
| 4  | 6  | 0 | 3.297151  | -1.189270 | -0.114359 |
| 5  | 6  | 0 | 3.956006  | 0.051771  | 0.026826  |
| 6  | 6  | 0 | 5.356257  | 0.087370  | 0.003634  |
| 7  | 6  | 0 | 1.195592  | 0.524733  | 0.054726  |
| 8  | 6  | 0 | -0.008657 | 0.869566  | 0.006676  |
| 9  | 6  | 0 | -1.345316 | 1.298414  | -0.073464 |
| 10 | 6  | 0 | -2.163697 | 1.360381  | 1.080724  |
| 11 | 6  | 0 | -3.465703 | 1.836785  | 0.993720  |
| 12 | 6  | 0 | -3.986899 | 2.262212  | -0.232625 |
| 13 | 6  | 0 | -3.192736 | 2.196000  | -1.382446 |
| 14 | 6  | 0 | -1.890015 | 1.715681  | -1.313293 |
| 15 | 6  | 0 | 1.844218  | -1.255498 | -0.087739 |
| 16 | 6  | 0 | 0.912930  | -2.133615 | -0.125717 |
| 17 | 6  | 0 | -0.430752 | -2.168926 | -0.092831 |
| 18 | 6  | 0 | -1.655323 | -2.050850 | -0.048925 |
| 19 | 6  | 0 | -3.034760 | -1.761659 | 0.007647  |
| 20 | 6  | 0 | -3.732046 | -1.802723 | 1.236475  |
| 21 | 6  | 0 | -5.075116 | -1.445768 | 1.294640  |
| 22 | 6  | 0 | -5.746516 | -1.034490 | 0.138396  |
| 23 | 6  | 0 | -5.067576 | -0.995952 | -1.083488 |
| 24 | 6  | 0 | -3.726673 | -1.355884 | -1.155195 |
| 25 | 1  | 0 | 7.186225  | -1.041058 | -0.174466 |
| 26 | 1  | 0 | 6.013581  | -3.222549 | -0.421070 |
| 27 | 1  | 0 | 3.530970  | -3.315241 | -0.380791 |
| 28 | 1  | 0 | 5.875411  | 1.036926  | 0.111475  |
| 29 | 1  | 0 | -1.760865 | 1.021115  | 2.028744  |
| 30 | 1  | 0 | -4.084927 | 1.864300  | 1.884580  |
| 31 | 1  | 0 | -5.005888 | 2.630193  | -0.293148 |
| 32 | 1  | 0 | -3.595516 | 2.513447  | -2.339614 |
| 33 | 1  | 0 | -1.272609 | 1.659136  | -2.203524 |
| 34 | 1  | 0 | -3.201806 | -2.111236 | 2.131140  |
| 35 | 1  | 0 | -5.599541 | -1.480088 | 2.244874  |
| 36 | 1  | 0 | -6.793188 | -0.750448 | 0.188678  |
| 37 | 1  | 0 | -5.585053 | -0.673302 | -1.981718 |
| 38 | 1  | 0 | -3.191982 | -1.315301 | -2.097368 |
| 39 | 14 | 0 | 2.785436  | 1.489883  | 0.236458  |
| 40 | 6  | 0 | 2.945024  | 2.778695  | -1.122761 |
| 41 | 1  | 0 | 3.923232  | 3.271462  | -1.077562 |
| 42 | 1  | 0 | 2.843180  | 2.314050  | -2.108197 |
| 43 | 1  | 0 | 2.171978  | 3.547993  | -1.022018 |



|    |   |   |          |          |          |
|----|---|---|----------|----------|----------|
| 44 | 6 | 0 | 2.890827 | 2.281837 | 1.938488 |
| 45 | 1 | 0 | 3.867879 | 2.756810 | 2.084926 |
| 46 | 1 | 0 | 2.117534 | 3.047933 | 2.059802 |
| 47 | 1 | 0 | 2.757057 | 1.529493 | 2.721712 |

-----

**TS3** (NIMG = 1, 613.91  $i$  cm<sup>-1</sup>)

-----

| Center<br>Number | Atomic<br>Number | Atomic<br>Type | Coordinates (Angstroms) |           |           |
|------------------|------------------|----------------|-------------------------|-----------|-----------|
|                  |                  |                | X                       | Y         | Z         |
| 1                | 6                | 0              | -0.212415               | -2.702063 | -0.313922 |
| 2                | 6                | 0              | -1.267281               | -2.021012 | -0.224593 |
| 3                | 6                | 0              | 1.174016                | -2.489085 | -0.313012 |
| 4                | 6                | 0              | -2.684011               | -1.796815 | -0.133558 |
| 5                | 6                | 0              | 1.795494                | -1.296602 | -0.171692 |
| 6                | 6                | 0              | -3.378407               | -2.181104 | 1.028138  |
| 7                | 6                | 0              | -3.383079               | -1.153335 | -1.169725 |
| 8                | 6                | 0              | 3.256799                | -1.080005 | -0.105245 |
| 9                | 6                | 0              | -4.744359               | -1.929835 | 1.144463  |
| 10               | 1                | 0              | -2.834636               | -2.670905 | 1.828928  |
| 11               | 6                | 0              | -4.745424               | -0.895894 | -1.043076 |
| 12               | 1                | 0              | -2.844694               | -0.847411 | -2.059194 |
| 13               | 6                | 0              | 3.677534                | 0.259661  | 0.092822  |
| 14               | 6                | 0              | 4.203560                | -2.107542 | -0.222366 |
| 15               | 6                | 0              | -5.429751               | -1.281353 | 0.113344  |
| 16               | 1                | 0              | -5.272598               | -2.233528 | 2.043173  |
| 17               | 1                | 0              | -5.273248               | -0.389655 | -1.845186 |
| 18               | 6                | 0              | 5.046835                | 0.536544  | 0.172118  |
| 19               | 14               | 0              | 2.190421                | 1.403754  | 0.200611  |
| 20               | 1                | 0              | 3.871220                | -3.129709 | -0.378028 |
| 21               | 6                | 0              | 5.562057                | -1.809087 | -0.139817 |
| 22               | 1                | 0              | -6.491525               | -1.076498 | 0.210656  |
| 23               | 1                | 0              | 5.388935                | 1.557668  | 0.323427  |
| 24               | 6                | 0              | 5.988502                | -0.489366 | 0.057688  |
| 25               | 6                | 0              | 1.003220                | -0.062286 | -0.036070 |
| 26               | 6                | 0              | 1.966574                | 2.243631  | 1.869034  |
| 27               | 6                | 0              | 2.099725                | 2.666664  | -1.192463 |
| 28               | 1                | 0              | 6.294632                | -2.605801 | -0.230460 |
| 29               | 1                | 0              | 7.049384                | -0.265502 | 0.119754  |

|    |   |   |           |          |           |
|----|---|---|-----------|----------|-----------|
| 30 | 6 | 0 | -0.328556 | 0.005958 | -0.032997 |
| 31 | 1 | 0 | 2.729066  | 3.013651 | 2.032721  |
| 32 | 1 | 0 | 0.983284  | 2.724157 | 1.922322  |
| 33 | 1 | 0 | 2.035783  | 1.514155 | 2.681766  |
| 34 | 1 | 0 | 1.148964  | 3.209292 | -1.158462 |
| 35 | 1 | 0 | 2.910862  | 3.399345 | -1.109485 |
| 36 | 1 | 0 | 2.183196  | 2.176301 | -2.167355 |
| 37 | 6 | 0 | -1.337446 | 1.005961 | -0.013221 |
| 38 | 6 | 0 | -2.161662 | 1.192053 | 1.124190  |
| 39 | 6 | 0 | -1.604857 | 1.778201 | -1.172048 |
| 40 | 6 | 0 | -3.194862 | 2.119964 | 1.103912  |
| 41 | 1 | 0 | -1.979387 | 0.587568 | 2.006046  |
| 42 | 6 | 0 | -2.639252 | 2.707438 | -1.180170 |
| 43 | 1 | 0 | -0.989199 | 1.627559 | -2.052894 |
| 44 | 6 | 0 | -3.442295 | 2.881260 | -0.046256 |
| 45 | 1 | 0 | -3.818269 | 2.248585 | 1.983510  |
| 46 | 1 | 0 | -2.825762 | 3.296742 | -2.073227 |
| 47 | 1 | 0 | -4.255851 | 3.599736 | -0.059422 |

-----

**TS4** (NIMG = 1, 473.58*i* cm<sup>-1</sup>)

-----

| Center<br>Number | Atomic<br>Number | Atomic<br>Type | Coordinates (Angstroms) |           |           |
|------------------|------------------|----------------|-------------------------|-----------|-----------|
|                  |                  |                | X                       | Y         | Z         |
| 1                | 6                | 0              | 1.398993                | -0.093130 | 0.141269  |
| 2                | 6                | 0              | 0.131854                | 0.374985  | 0.207883  |
| 3                | 6                | 0              | -1.140160               | -0.095114 | 0.147931  |
| 4                | 6                | 0              | -2.327166               | 0.770253  | 0.353250  |
| 5                | 6                | 0              | -1.501534               | -1.495716 | -0.210615 |
| 6                | 6                | 0              | 2.608301                | -0.345864 | 0.138855  |
| 7                | 6                | 0              | -2.224619               | 2.102565  | 0.319559  |
| 8                | 6                | 0              | -2.887185               | -1.800359 | -0.178208 |
| 9                | 6                | 0              | -1.020751               | -3.779463 | -0.855043 |
| 10               | 6                | 0              | -0.575340               | -2.493810 | -0.550326 |
| 11               | 6                | 0              | 3.979763                | -0.686150 | 0.122964  |
| 12               | 6                | 0              | -1.077123               | 2.934804  | 0.189018  |
| 13               | 6                | 0              | -3.310385               | -3.097928 | -0.482349 |
| 14               | 1                | 0              | 0.483876                | -2.266692 | -0.581075 |
| 15               | 1                | 0              | 0.032512                | 1.930240  | 1.751736  |

|    |    |   |           |           |           |
|----|----|---|-----------|-----------|-----------|
| 16 | 6  | 0 | 1.362712  | 3.072685  | 0.483480  |
| 17 | 1  | 0 | -1.945185 | 4.444167  | -1.070226 |
| 18 | 6  | 0 | 0.195450  | 4.684077  | -0.909839 |
| 19 | 1  | 0 | 4.510511  | 0.824756  | -1.325554 |
| 20 | 1  | 0 | 7.767254  | -1.616942 | 0.076728  |
| 21 | 1  | 0 | 2.281323  | 2.688601  | 0.916021  |
| 22 | 1  | 0 | 0.229684  | 5.552001  | -1.560381 |
| 23 | 1  | 0 | 6.191936  | -2.872962 | 1.535031  |
| 24 | 1  | 0 | -0.298744 | -4.546118 | -1.120764 |
| 25 | 6  | 0 | 4.474039  | -1.736522 | 0.931124  |
| 26 | 6  | 0 | -1.025587 | 4.072526  | -0.629004 |
| 27 | 6  | 0 | 6.713233  | -1.357742 | 0.089654  |
| 28 | 1  | 0 | -2.721959 | -5.092999 | -1.059805 |
| 29 | 6  | 0 | 0.132003  | 2.417384  | 0.784856  |
| 30 | 1  | 0 | -4.369451 | -3.344079 | -0.459291 |
| 31 | 6  | 0 | -2.385139 | -4.088344 | -0.821689 |
| 32 | 6  | 0 | 5.826318  | -2.064054 | 0.909723  |
| 33 | 6  | 0 | 4.885956  | 0.020314  | -0.701986 |
| 34 | 1  | 0 | 6.920184  | 0.233671  | -1.353121 |
| 35 | 6  | 0 | 1.389072  | 4.163722  | -0.366805 |
| 36 | 6  | 0 | 6.236046  | -0.316443 | -0.714092 |
| 37 | 1  | 0 | 3.783309  | -2.280520 | 1.566650  |
| 38 | 1  | 0 | 2.336048  | 4.641676  | -0.600086 |
| 39 | 14 | 0 | -3.888055 | -0.285050 | 0.294029  |
| 40 | 6  | 0 | -4.733128 | -0.438121 | 1.969898  |
| 41 | 1  | 0 | -5.168298 | 0.520282  | 2.274170  |
| 42 | 1  | 0 | -5.539290 | -1.179983 | 1.935397  |
| 43 | 1  | 0 | -4.017252 | -0.748054 | 2.737465  |
| 44 | 6  | 0 | -5.115095 | 0.267515  | -1.020494 |
| 45 | 1  | 0 | -5.946078 | -0.441674 | -1.107726 |
| 46 | 1  | 0 | -5.534435 | 1.248106  | -0.769216 |
| 47 | 1  | 0 | -4.626357 | 0.344817  | -1.996450 |

---

### viii. References

- [1] N. Sugimura, A. Furuya, T. Yatsu, T. Shibue, *Eur. J. Mass Spectrom.*, **2015**, *21*, 91-96.
- [2] T. Shibata, T. Uchiyama, Y. Yoshinami, S. Takayasu, K. Tsuchikamaa and K. Endo, *Chem. Commun.*, **2012**, *48*, 1311–1313.
- [3] Gaussian 09, revision B.01; M. J. Frisch, G. W. Trucks, H. B. Schlegel, G. E. Scuseria, M. A. Robb, J. R. Cheeseman, G. Scalmani, V. Barone, B. Mennucci, G. A. Petersson, H. Nakatsuji, M. Caricato, X. Li, H.

- P. Hratchian, A. F. Izmaylov, J. Bloino, G. Zheng, J. L. Sonnenberg, M. Hada, M. Ehara, K. Toyota, R. Fukuda, J. Hasegawa, M. Ishida, T. Nakajima, Y. Honda, O. Kitao, H. Nakai, T. Vreven, J. A. Montgomery, Jr., J. E. Peralta, F. Ogliaro, M. Bearpark, J. J. Heyd, E. Brothers, K. N. Kudin, V. N. Staroverov, T. Keith, R. Kobayashi, J. Normand, K. Raghavachari, A. Rendell, J. C. Burant, S. S. Iyengar, J. Tomasi, M. Cossi, N. Rega, J. M. Millam, M. Klene, J. E. Knox, J. B. Cross, V. Bakken, C. Adamo, J. Jaramillo, R. Gomperts, R. E. Stratmann, O. Yazyev, A. J. Austin, R. Cammi, C. Pomelli, J. W. Ochterski, R. L. Martin, K. Morokuma, V. G. Zakrzewski, G. A. Voth, P. Salvador, J. J. Dannenberg, S. Dapprich, A. D. Daniels, O. Farkas, J. B. Foresman, J. V. Ortiz, J. Cioslowski, and D. J. Fox, Gaussian, Inc., Wallingford CT, 2010.
- [4] a) S. Grimme, J. Antony, S. Ehrlich, H. Krieg, *J. Chem. Phys.* **2010**, *132*, 154104 b) E. R. Johnson, A. D. Becke, *J. Chem. Phys.* **2006**, *124*, 174104
- [5] Gaussian 16, Revision A.03, M. J. Frisch, G. W. Trucks, H. B. Schlegel, G. E. Scuseria, M. A. Robb, J. R. Cheeseman, G. Scalmani, V. Barone, G. A. Petersson, H. Nakatsuji, X. Li, M. Caricato, A. V. Marenich, J. Bloino, B. G. Janesko, R. Gomperts, B. Mennucci, H. P. Hratchian, J. V. Ortiz, A. F. Izmaylov, J. L. Sonnenberg, D. Williams-Young, F. Ding, F. Lipparini, F. Egidi, J. Goings, B. Peng, A. Petrone, T. Henderson, D. Ranasinghe, V. G. Zakrzewski, J. Gao, N. Rega, G. Zheng, W. Liang, M. Hada, M. Ehara, K. Toyota, R. Fukuda, J. Hasegawa, M. Ishida, T. Nakajima, Y. Honda, O. Kitao, H. Nakai, T. Vreven, K. Throssell, J. A. Montgomery, Jr., J. E. Peralta, F. Ogliaro, M. J. Bearpark, J. J. Heyd, E. N. Brothers, K. N. Kudin, V. N. Staroverov, T. A. Keith, R. Kobayashi, J. Normand, K. Raghavachari, A. P. Rendell, J. C. Burant, S. S. Iyengar, J. Tomasi, M. Cossi, J. M. Millam, M. Klene, C. Adamo, R. Cammi, J. W. Ochterski, R. L. Martin, K. Morokuma, O. Farkas, J. B. Foresman, and D. J. Fox, Gaussian, Inc., Wallingford CT, 2016.
- [6] A. V. Marenich,; C. J. Cramer, D. G. Truhlar, *J. Phys. Chem. B* **2009**, *113*, 6378–6396.
- [7] H. Jonsson, G. Mills, K. W. Jacobsen, Nudged Elastic Band Method for Finding Minimum Energy Paths of Transitions, in *Classical and Quantum Dynamics in Condensed Phase Simulations*, Ed. B. J. Berne, G. Ciccotti, D. F. Coker, 385 (World Scientific, 1998); G. Henkelman, H. Jonsson, Improved tangent estimate in the nudged elastic band method for finding minimum energy paths and saddle points. *J. Chem. Phys.* **2000**, *113*, 9978–9985.
- [8] (a) C. Peng, H. B. Schlegel, *Isr. J. Chem.* **1993**, *33*, 449–454. (b) C. Peng, P. Y. Ayala, H. B. Schlegel, M. J. Frisch, *J. Comput. Chem.* **1996**, *17*, 49–56.

viii. Copies of  $^1\text{H}$  and  $^{13}\text{C}$  NMR spectra for new compounds

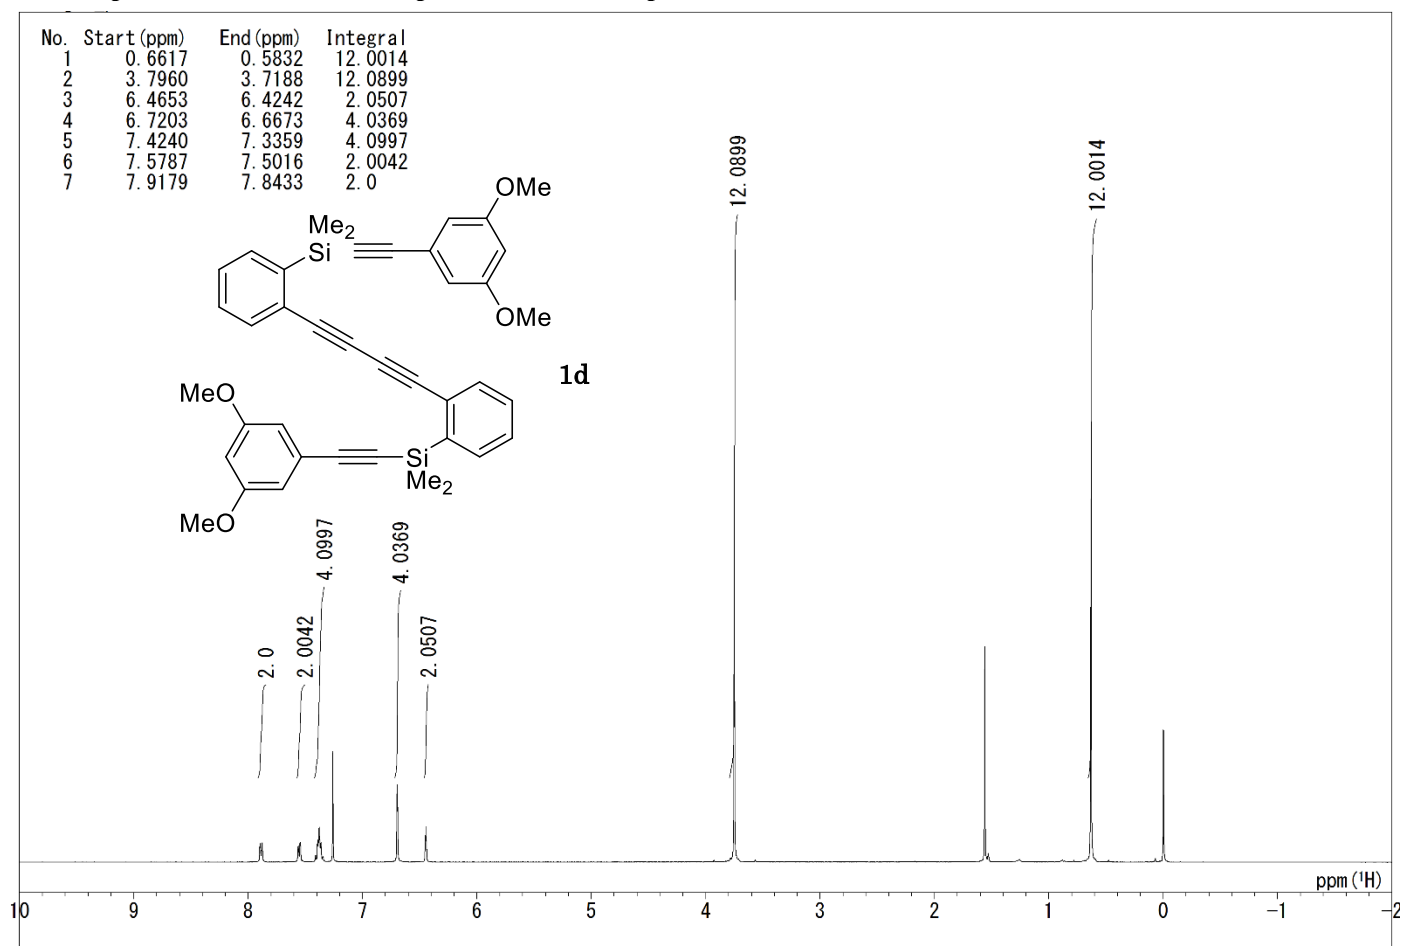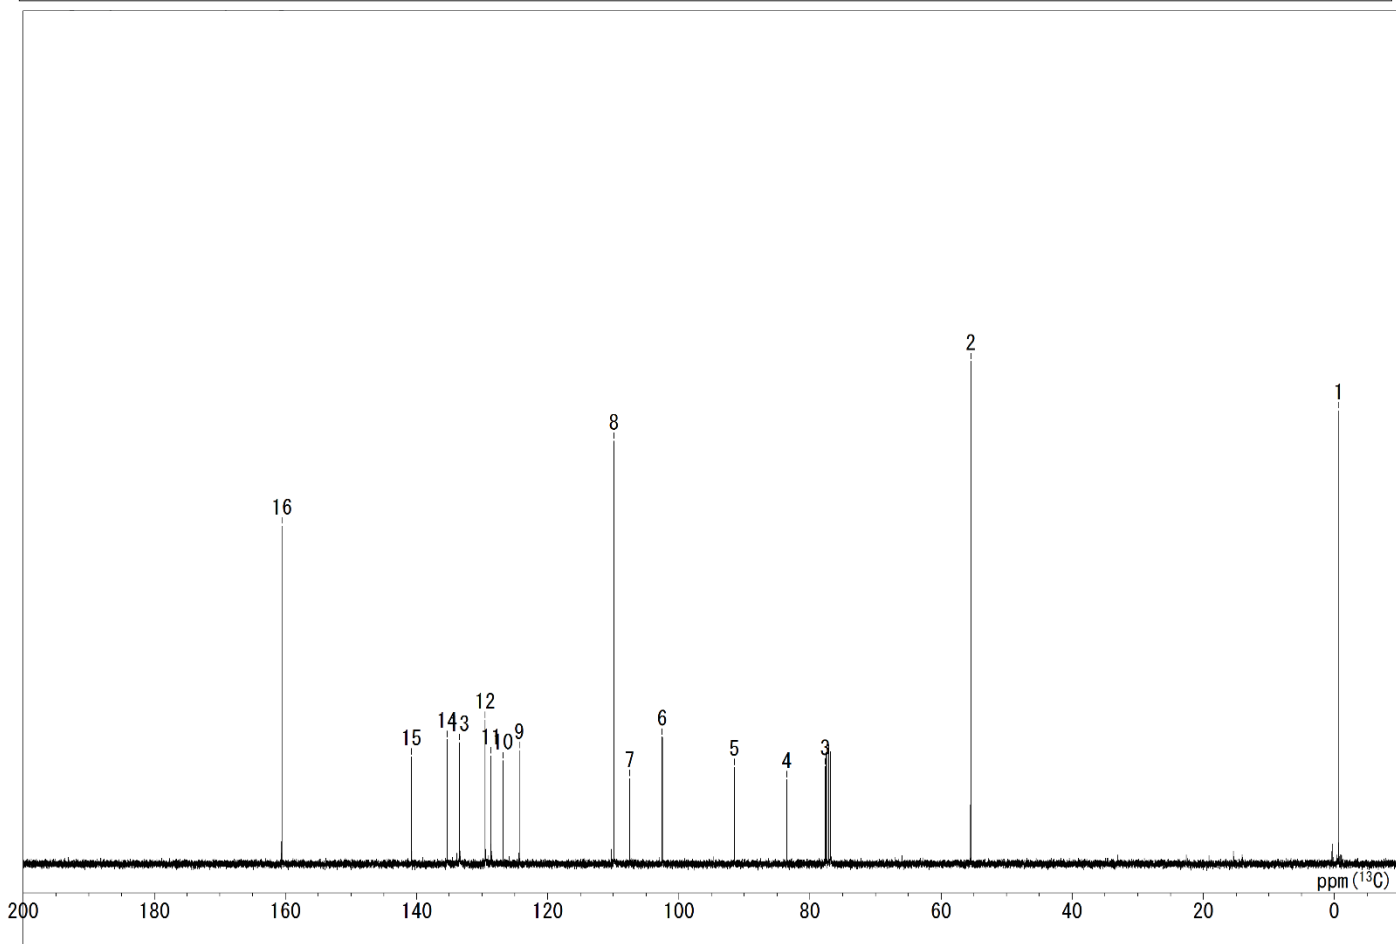

| No. | Start (ppm) | End (ppm) | Integral |
|-----|-------------|-----------|----------|
| 1   | 0.7355      | 0.6588    | 12.0819  |
| 2   | 3.9615      | 3.8849    | 6.0823   |
| 3   | 6.9745      | 6.8599    | 4.0987   |
| 4   | 7.3531      | 7.2819    | 2.0362   |
| 5   | 7.4610      | 7.3541    | 4.0082   |
| 6   | 7.6210      | 7.5248    | 4.0104   |
| 7   | 8.1940      | 8.0651    | 2.0      |

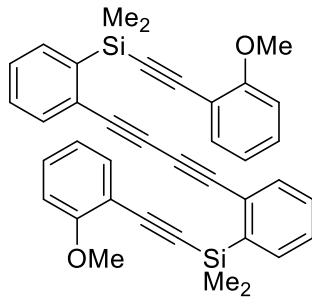

1e

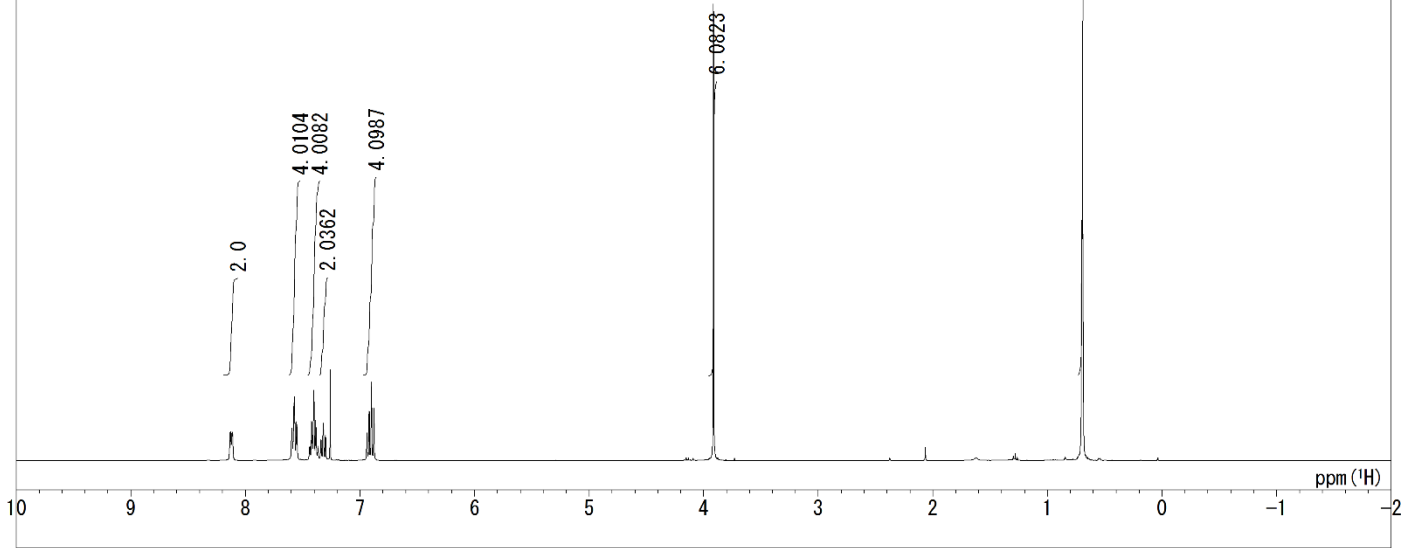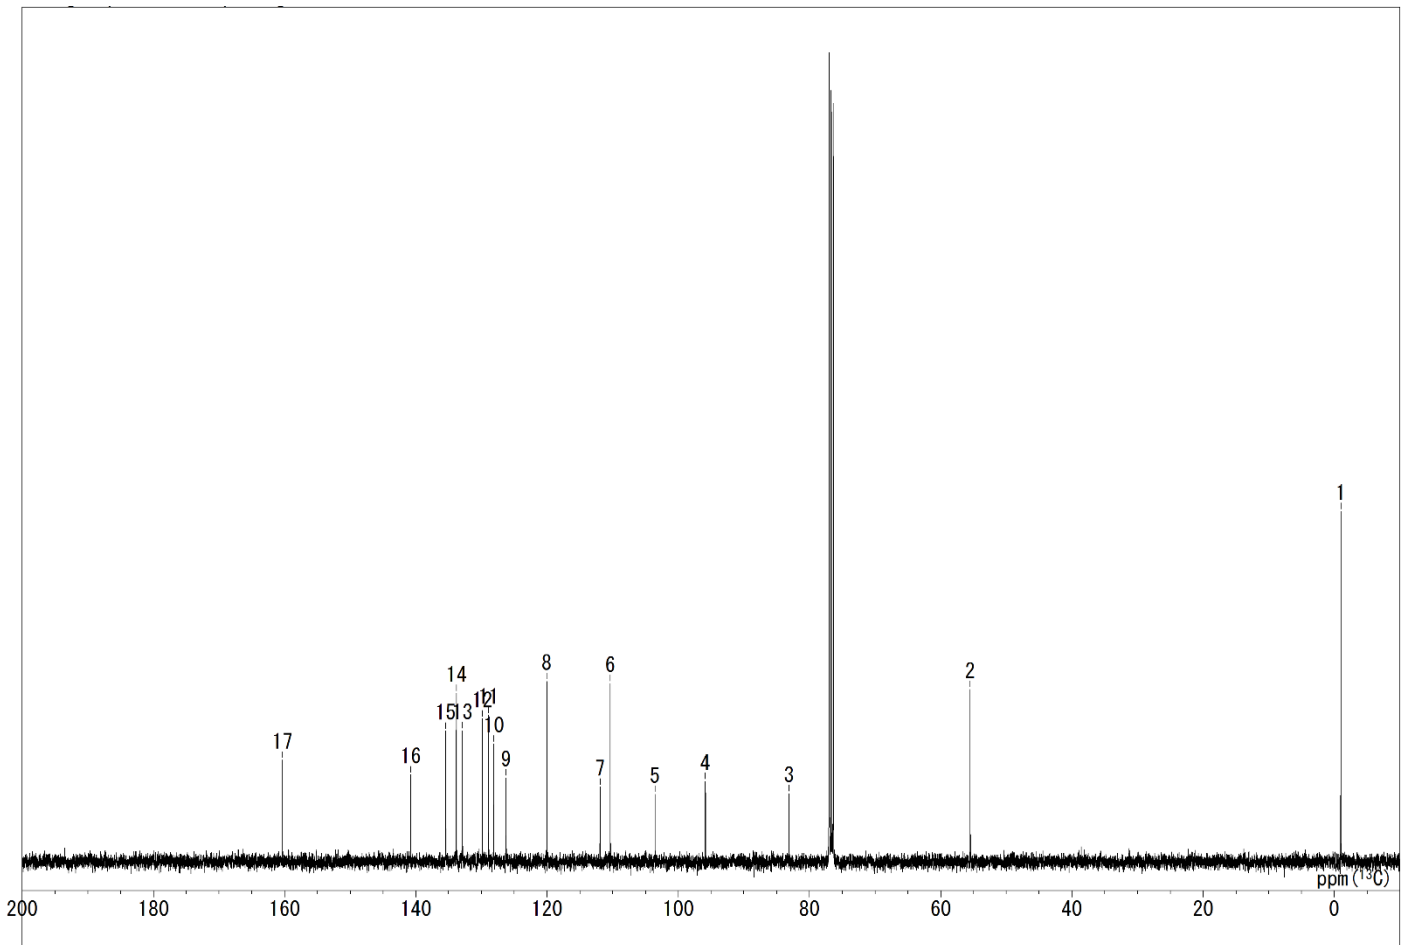

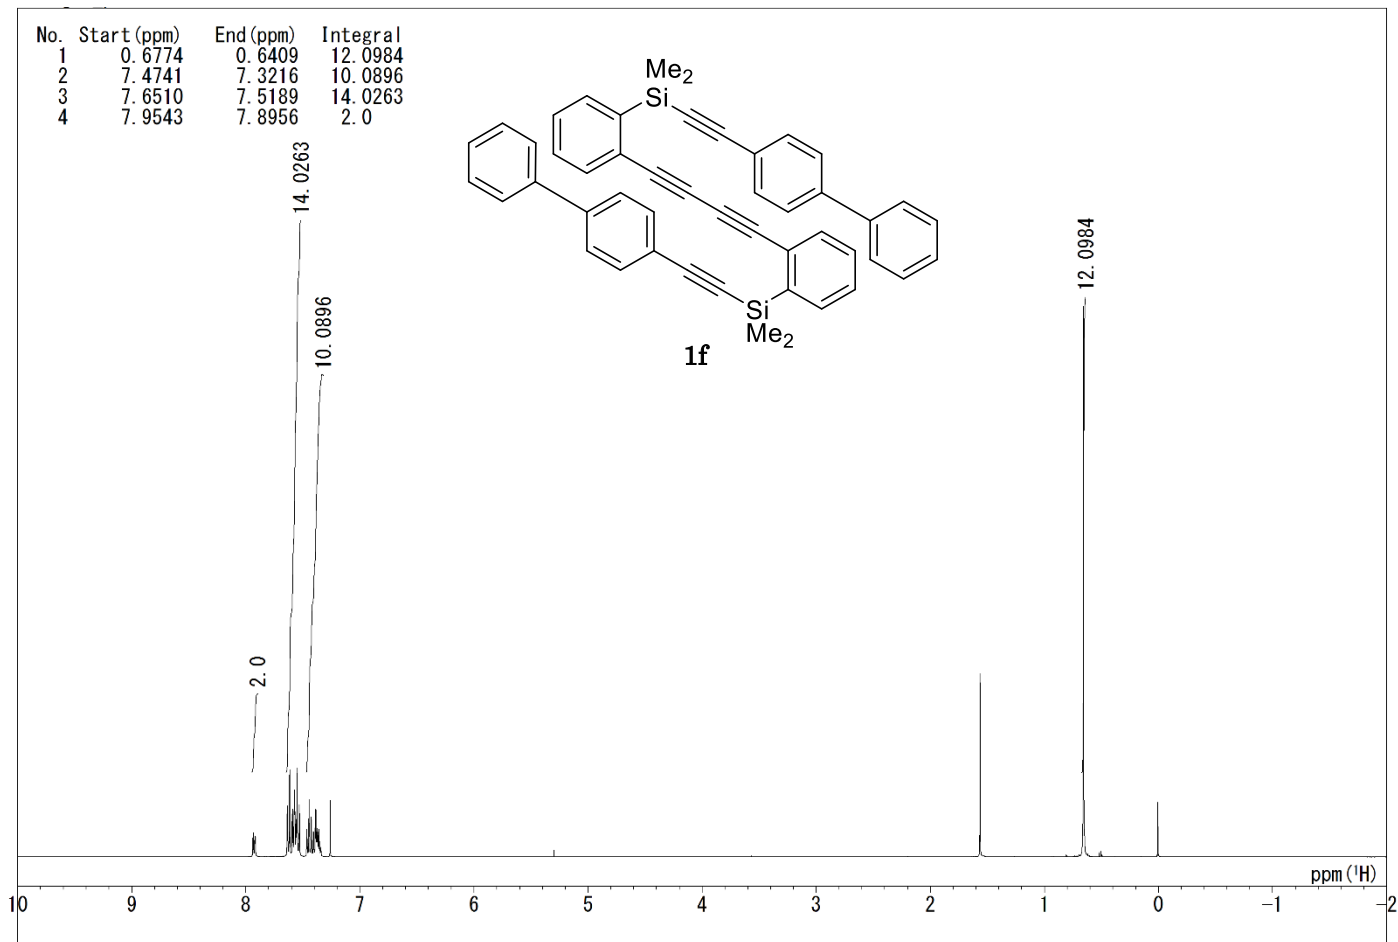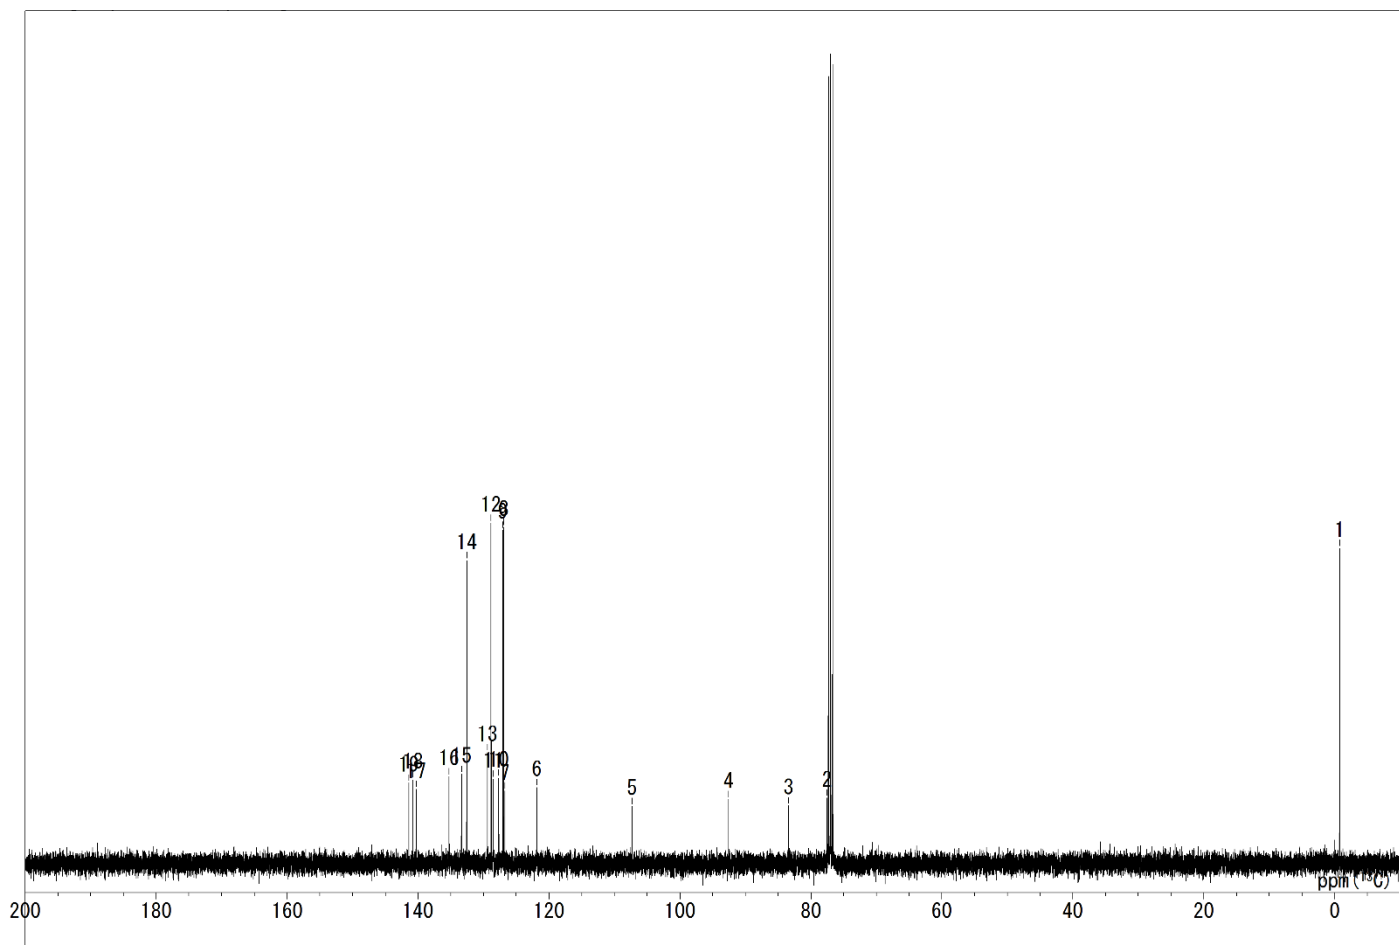

smg10\_pure

| No. | Start (ppm) | End (ppm) | Integral |
|-----|-------------|-----------|----------|
| 1   | 0.7732      | 0.6700    | 12.0804  |
| 2   | 7.4023      | 7.2957    | 6.0391   |
| 3   | 7.4820      | 7.4179    | 2.0276   |
| 4   | 7.5850      | 7.4991    | 4.0951   |
| 5   | 7.8290      | 7.7350    | 6.0061   |
| 6   | 8.0253      | 7.9443    | 2.0398   |
| 7   | 8.4876      | 8.3852    | 2.0      |

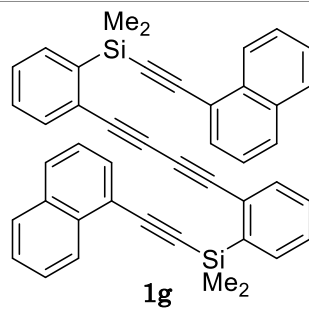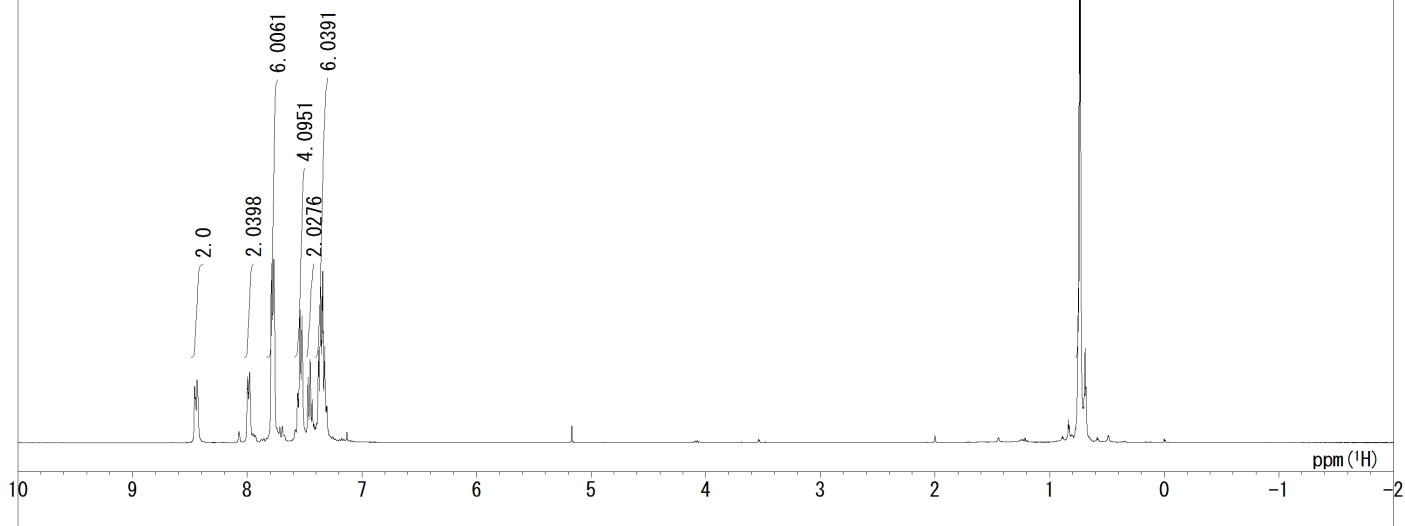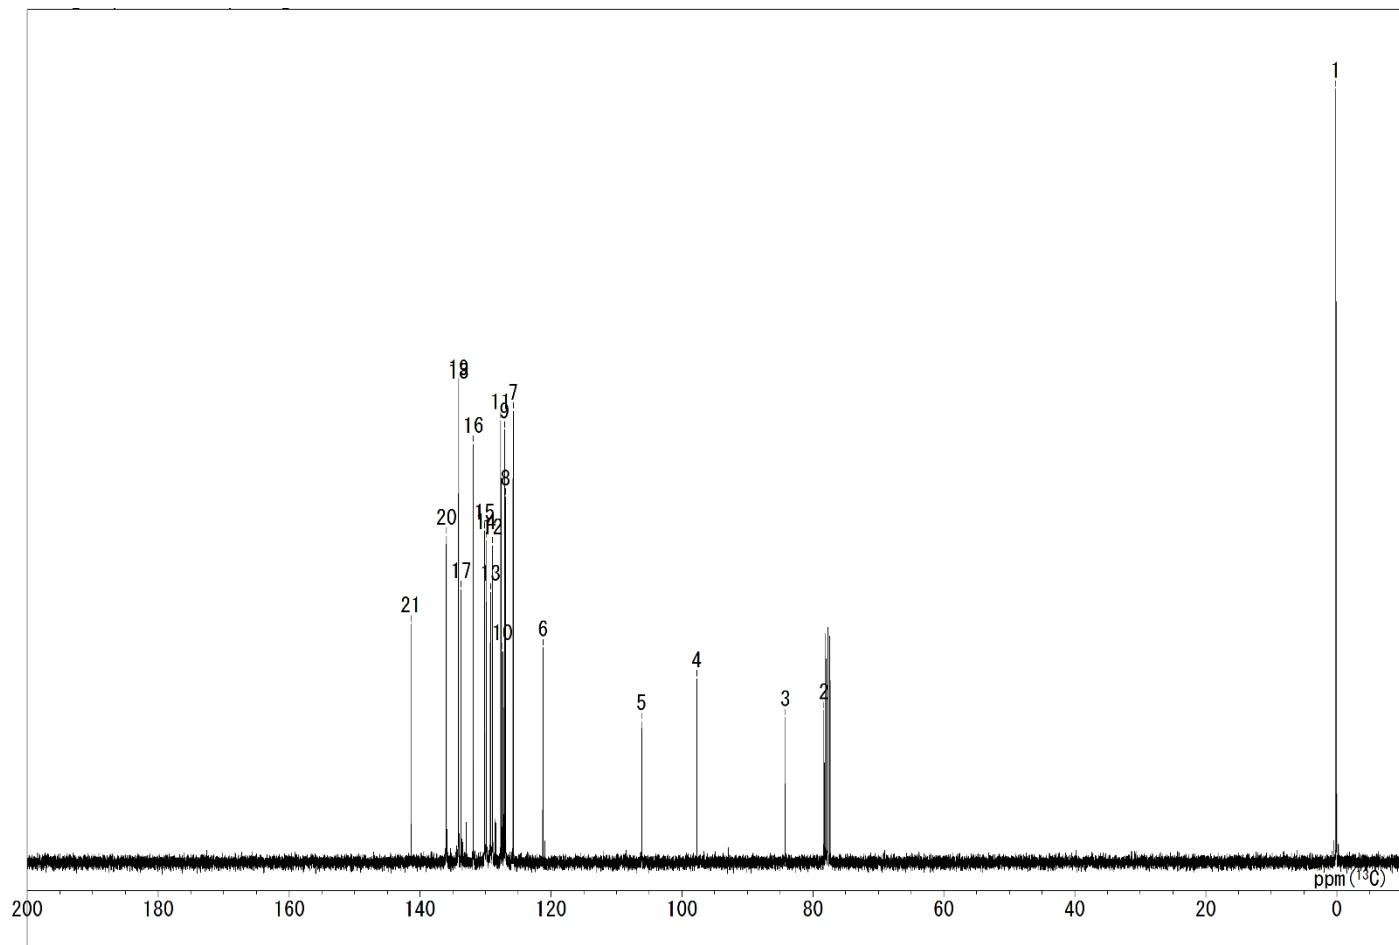



| No. | Start (ppm) | End (ppm) | Integral |
|-----|-------------|-----------|----------|
| 1   | 0.6837      | 0.6492    | 12.0663  |
| 2   | 7.4380      | 7.3217    | 8.0905   |
| 3   | 7.5935      | 7.5246    | 4.0471   |
| 4   | 7.7245      | 7.6804    | 2.0847   |
| 5   | 7.7796      | 7.7239    | 2.0769   |
| 6   | 7.9010      | 7.8476    | 2.0      |

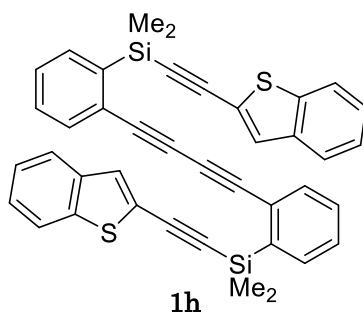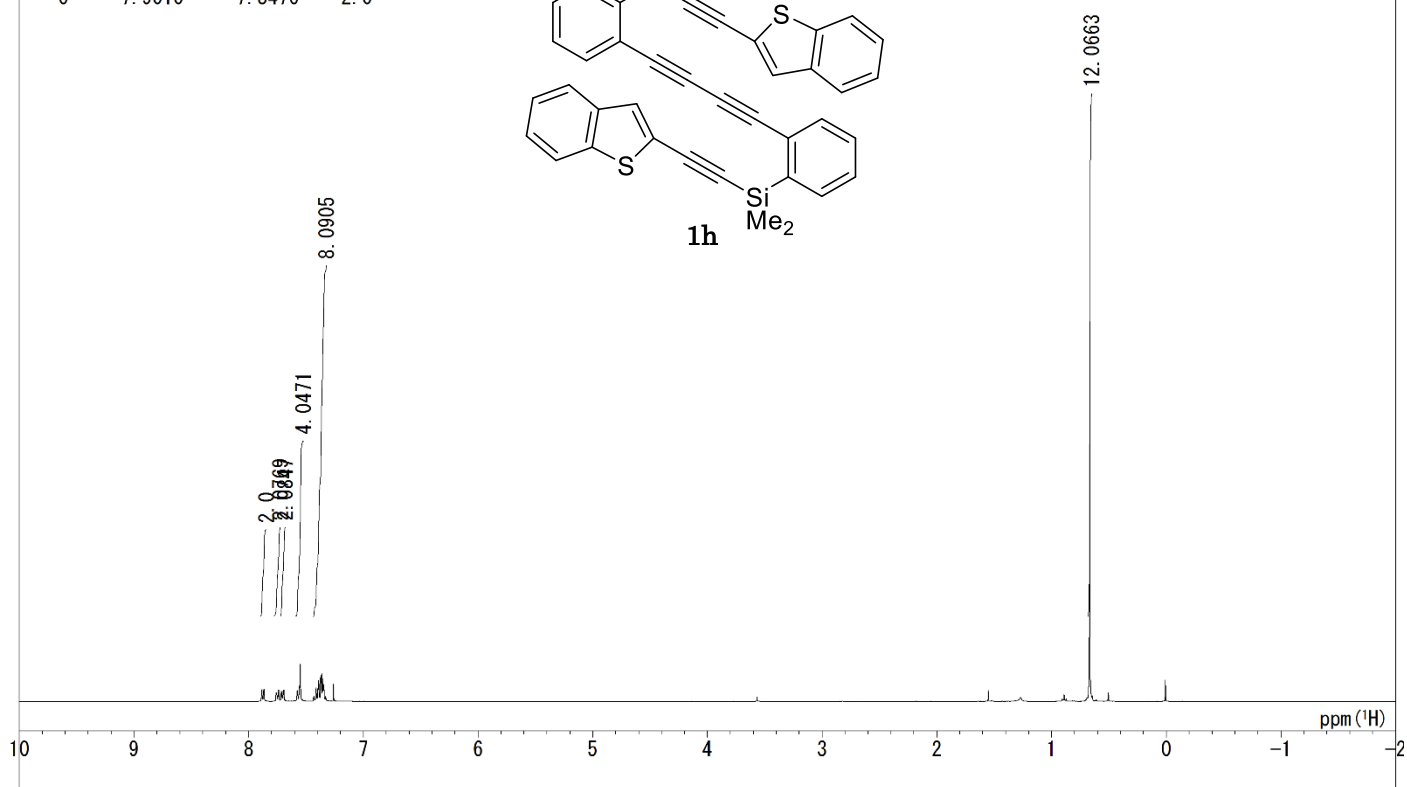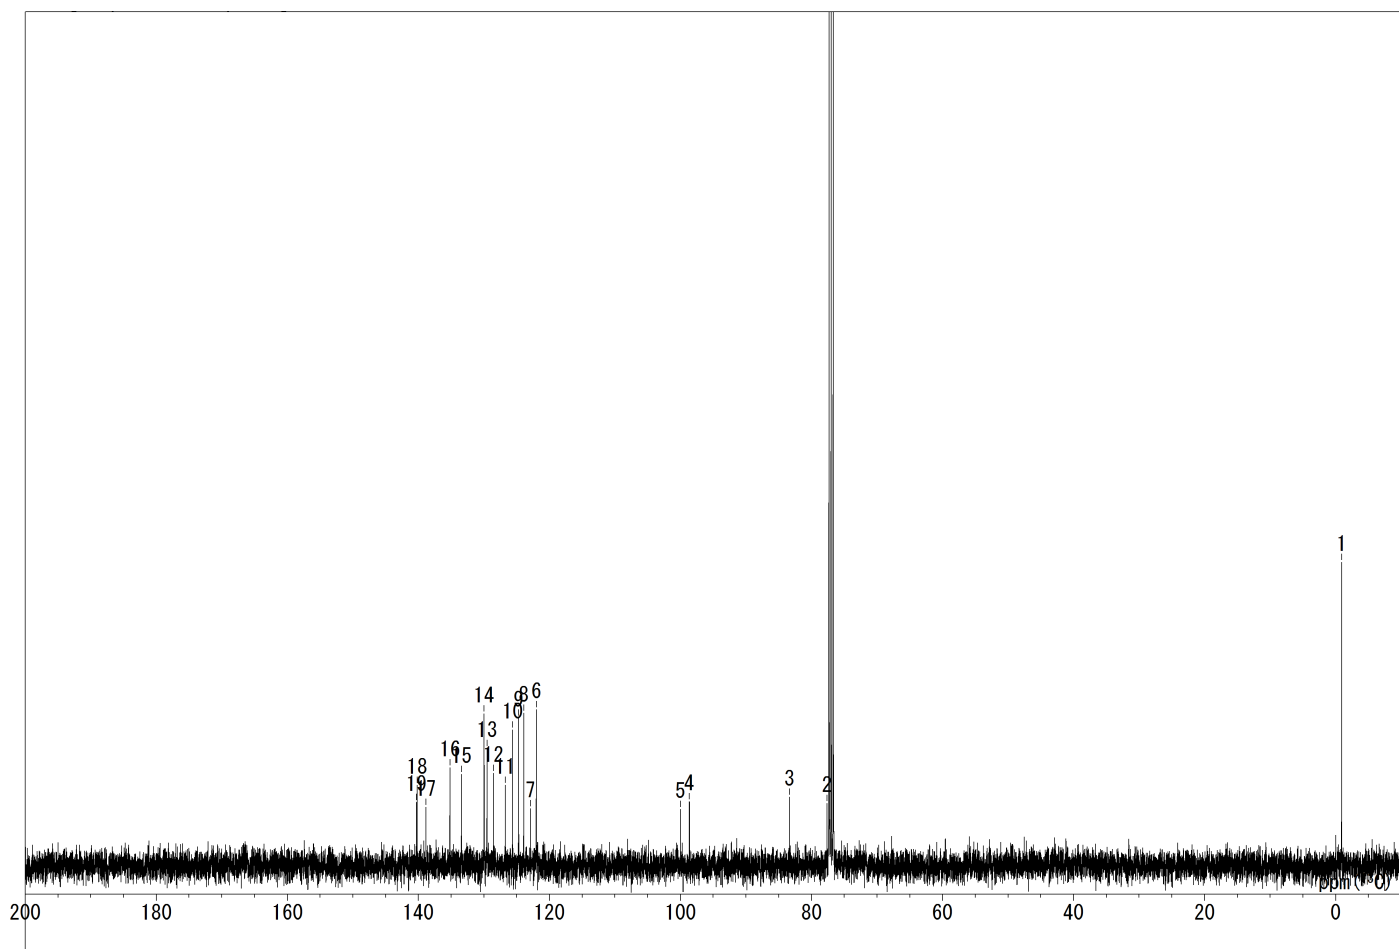

| No. | Start (ppm) | End (ppm) | Integral |
|-----|-------------|-----------|----------|
| 1   | 0.6913      | 0.6572    | 12.0612  |
| 2   | 7.4378      | 7.3325    | 4.0233   |
| 3   | 7.5107      | 7.4388    | 4.021    |
| 4   | 7.6115      | 7.5311    | 4.0299   |
| 5   | 7.8299      | 7.7142    | 6.034    |
| 6   | 7.9686      | 7.9151    | 2.0265   |
| 7   | 8.1067      | 8.0640    | 2.0      |

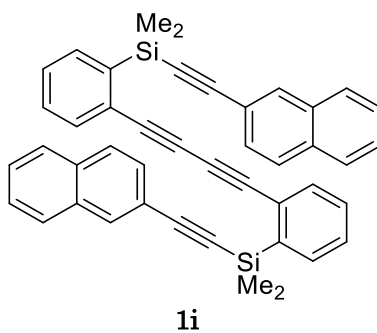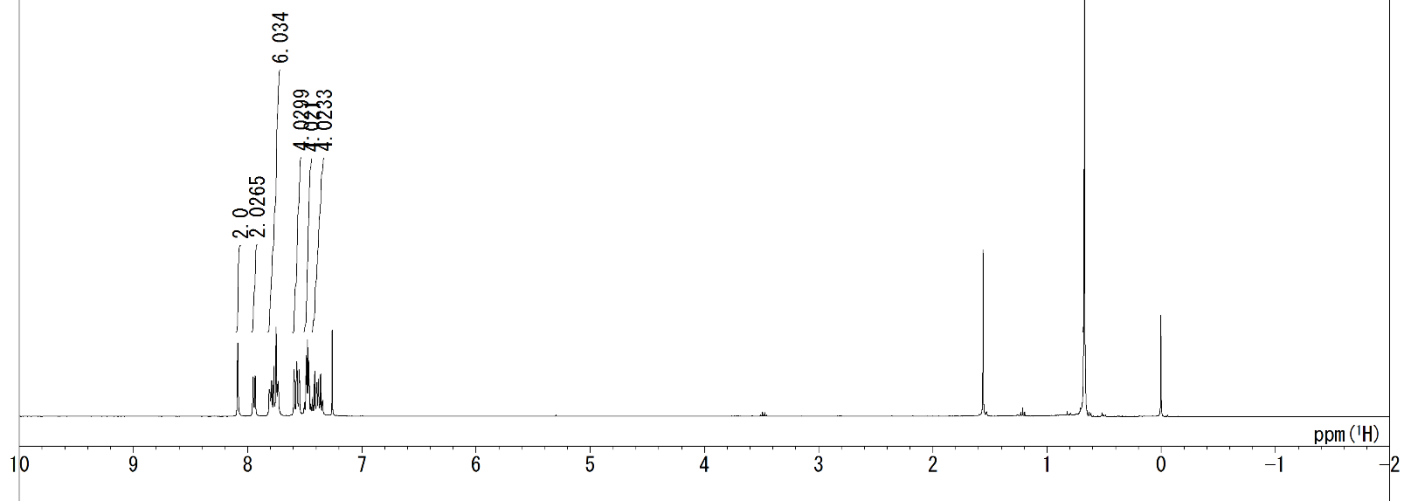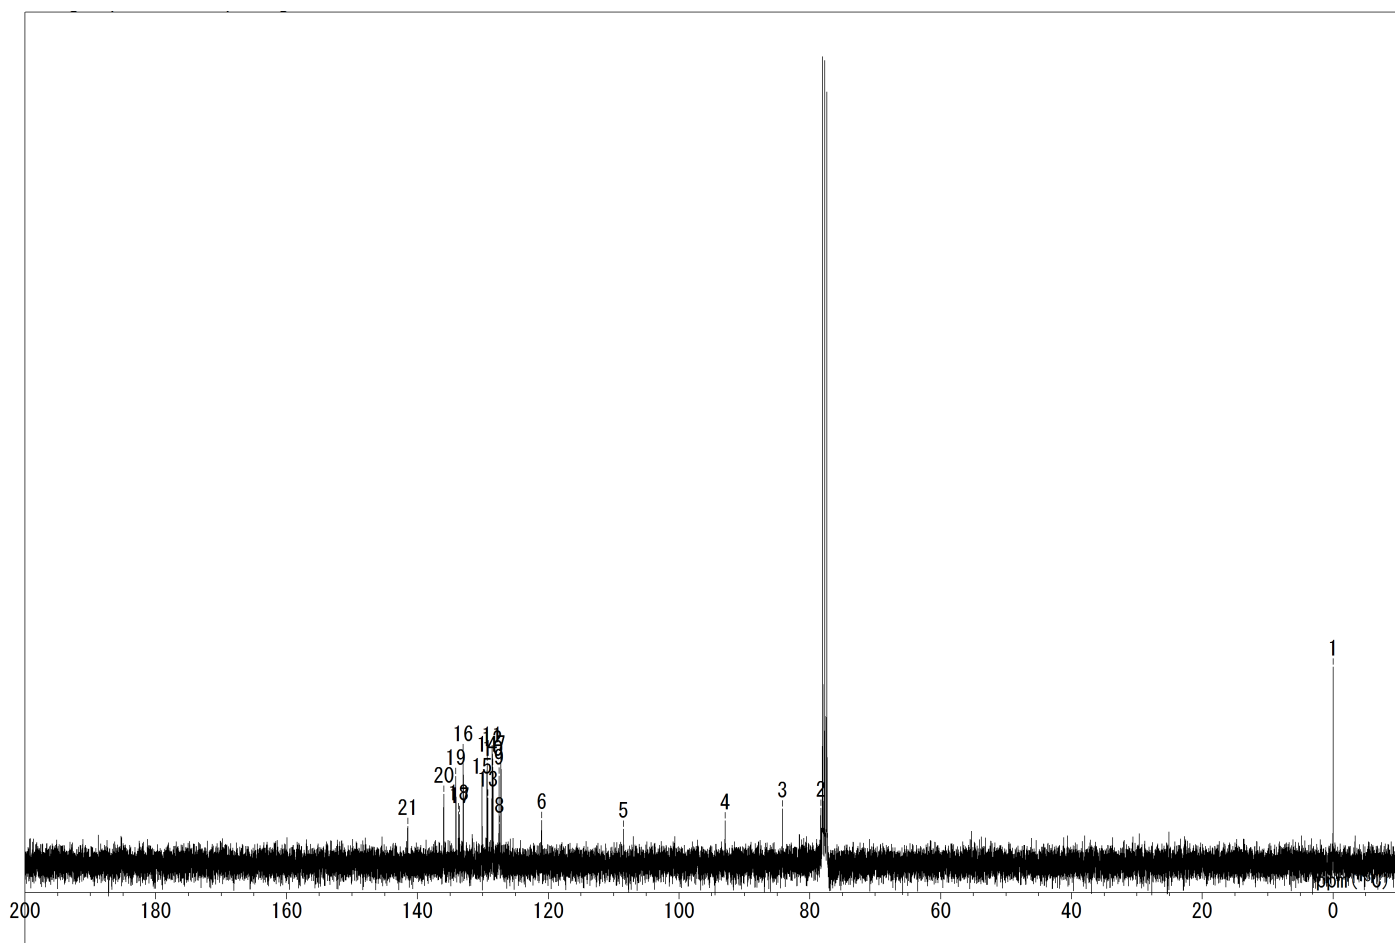

| No. | Start (ppm) | End (ppm) | Integral |
|-----|-------------|-----------|----------|
| 1   | 3.8121      | 3.7014    | 6.0      |
| 2   | 6.8237      | 6.6751    | 4.0514   |
| 3   | 7.4520      | 7.2740    | 18.0768  |
| 4   | 7.5573      | 7.4712    | 4.0532   |
| 5   | 7.7646      | 7.6432    | 10.0657  |

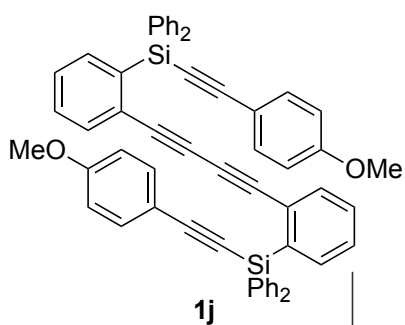

10 9 8 7 6 5 4 3 2 1 0 -1 -2  
ppm (H)

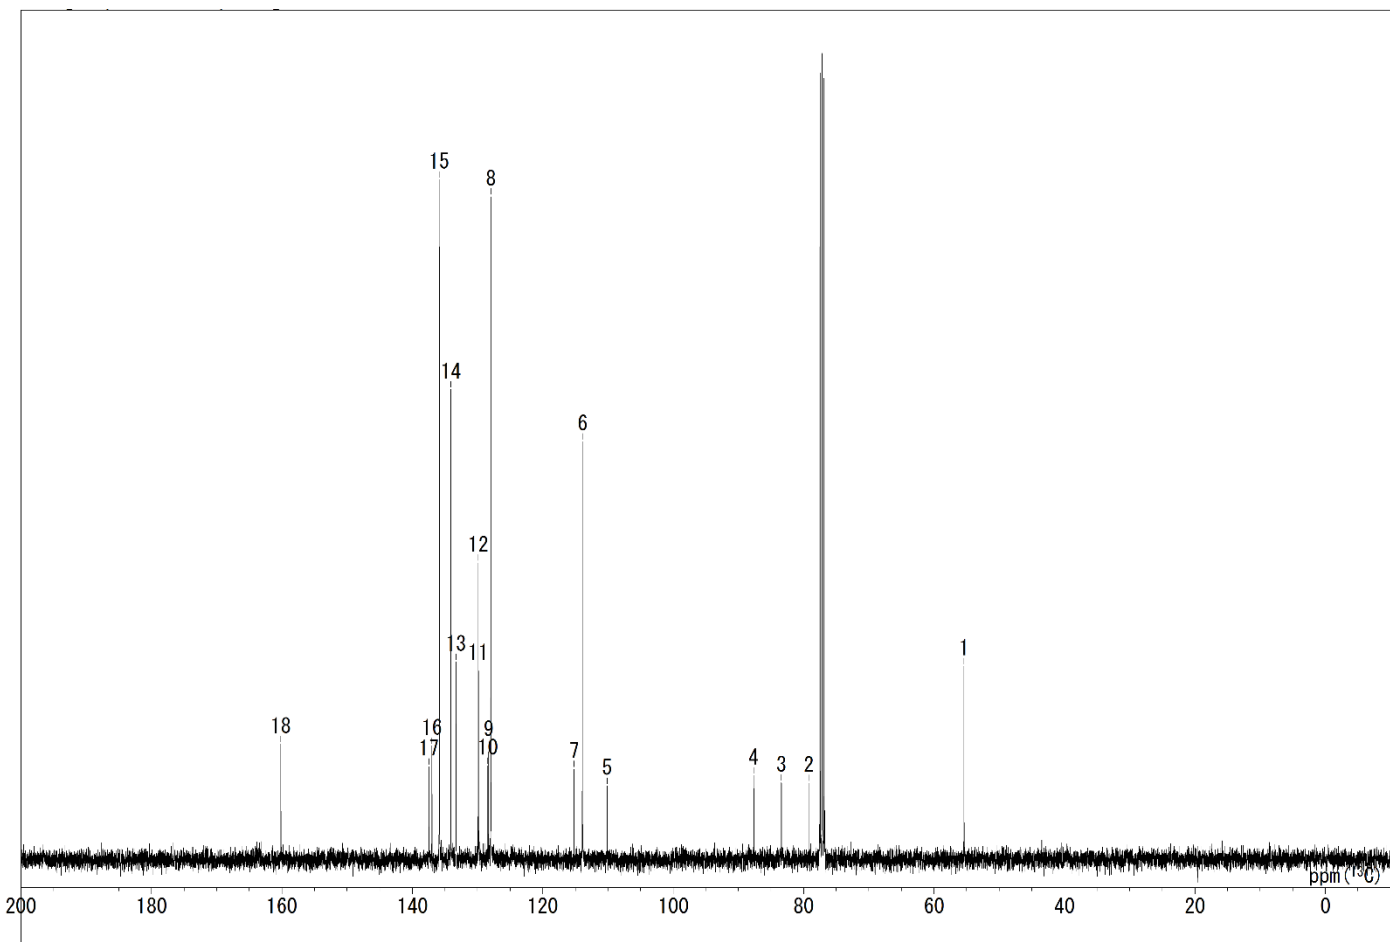

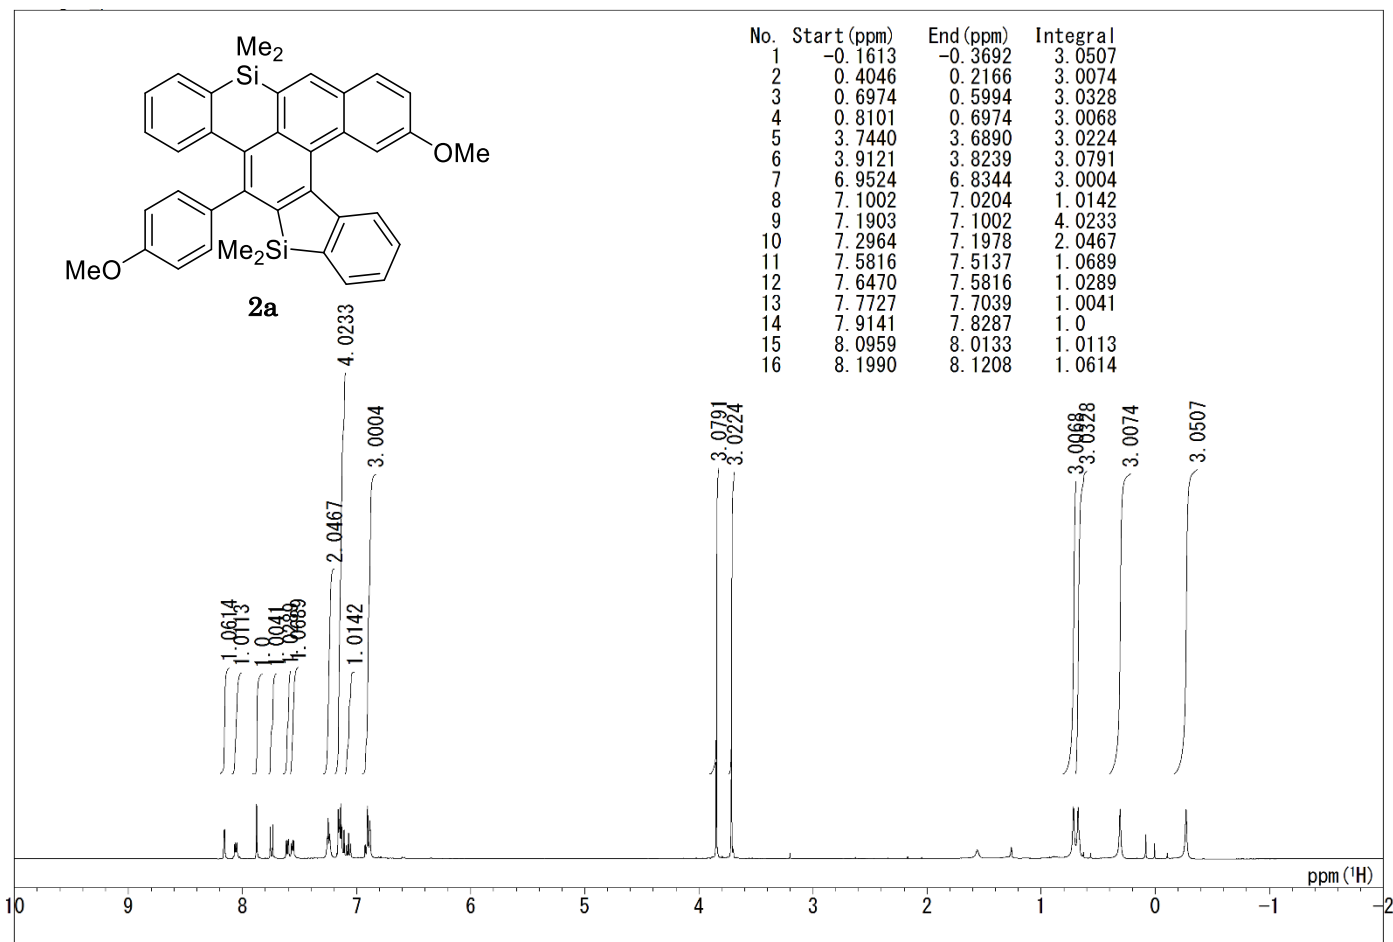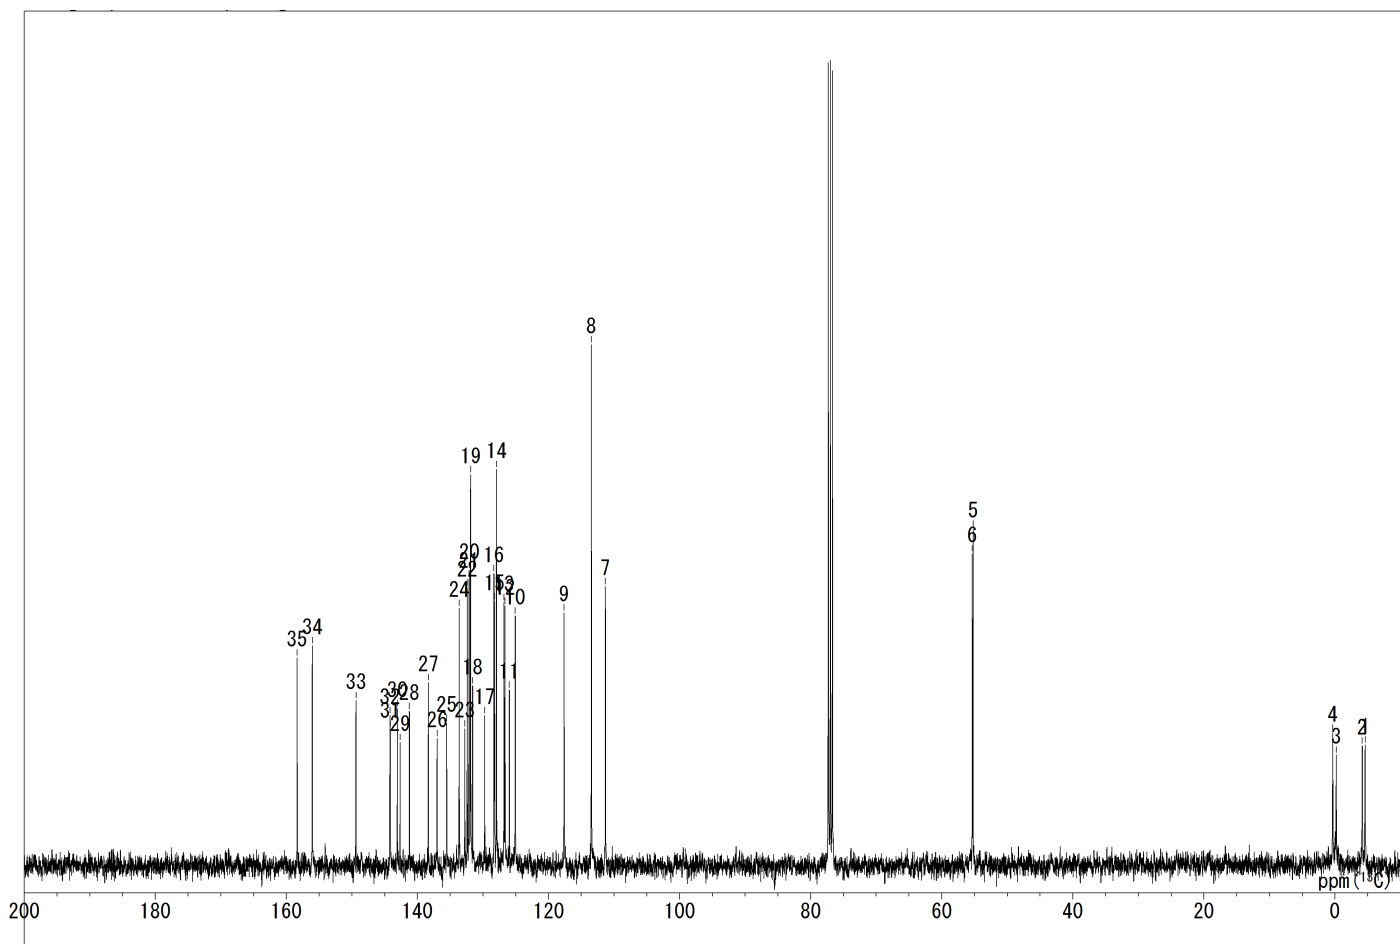

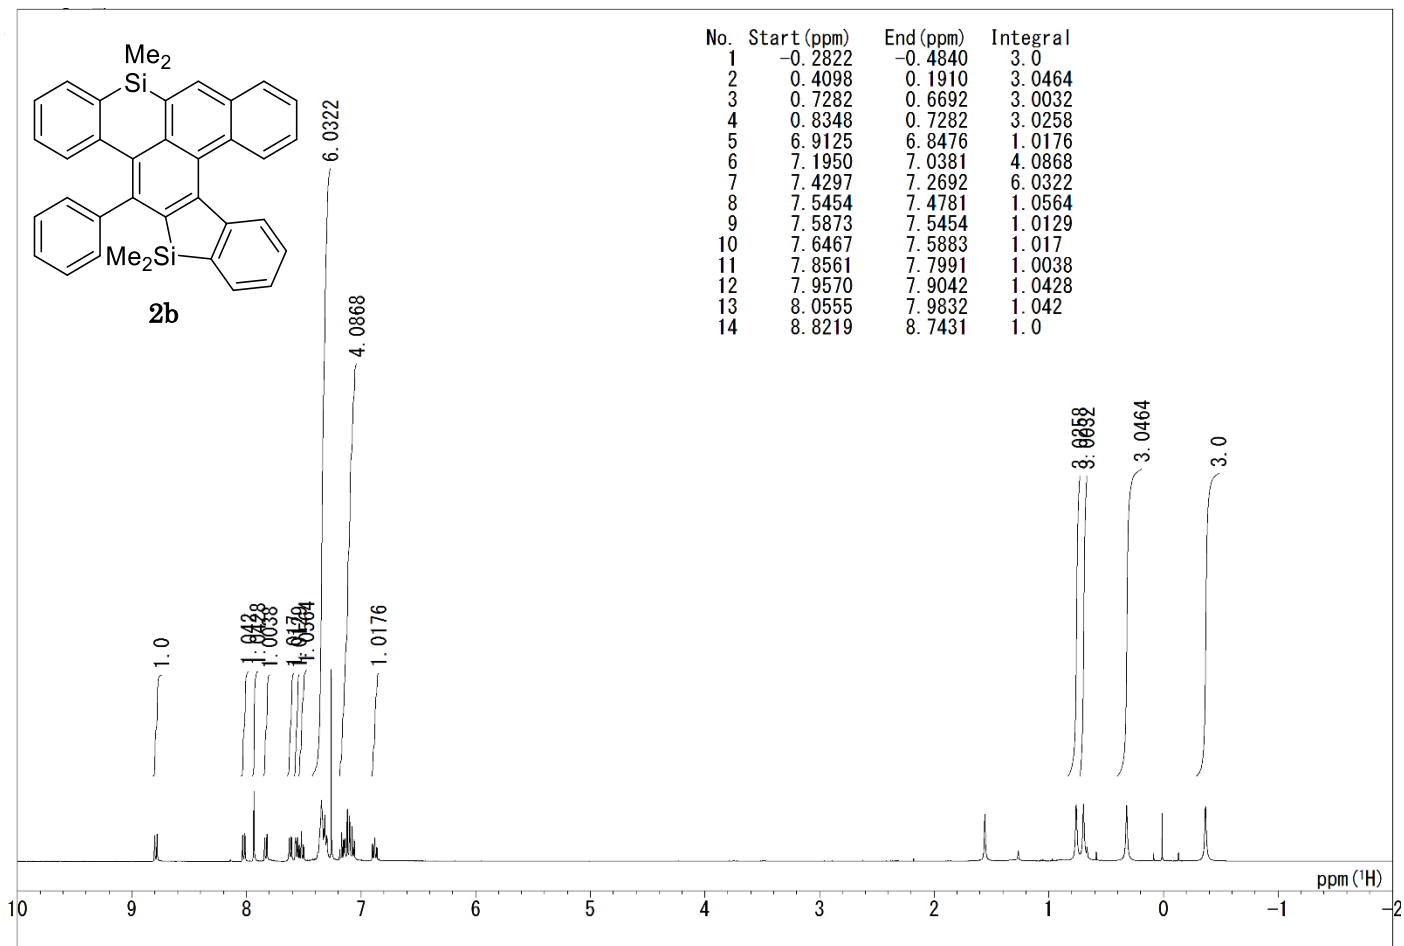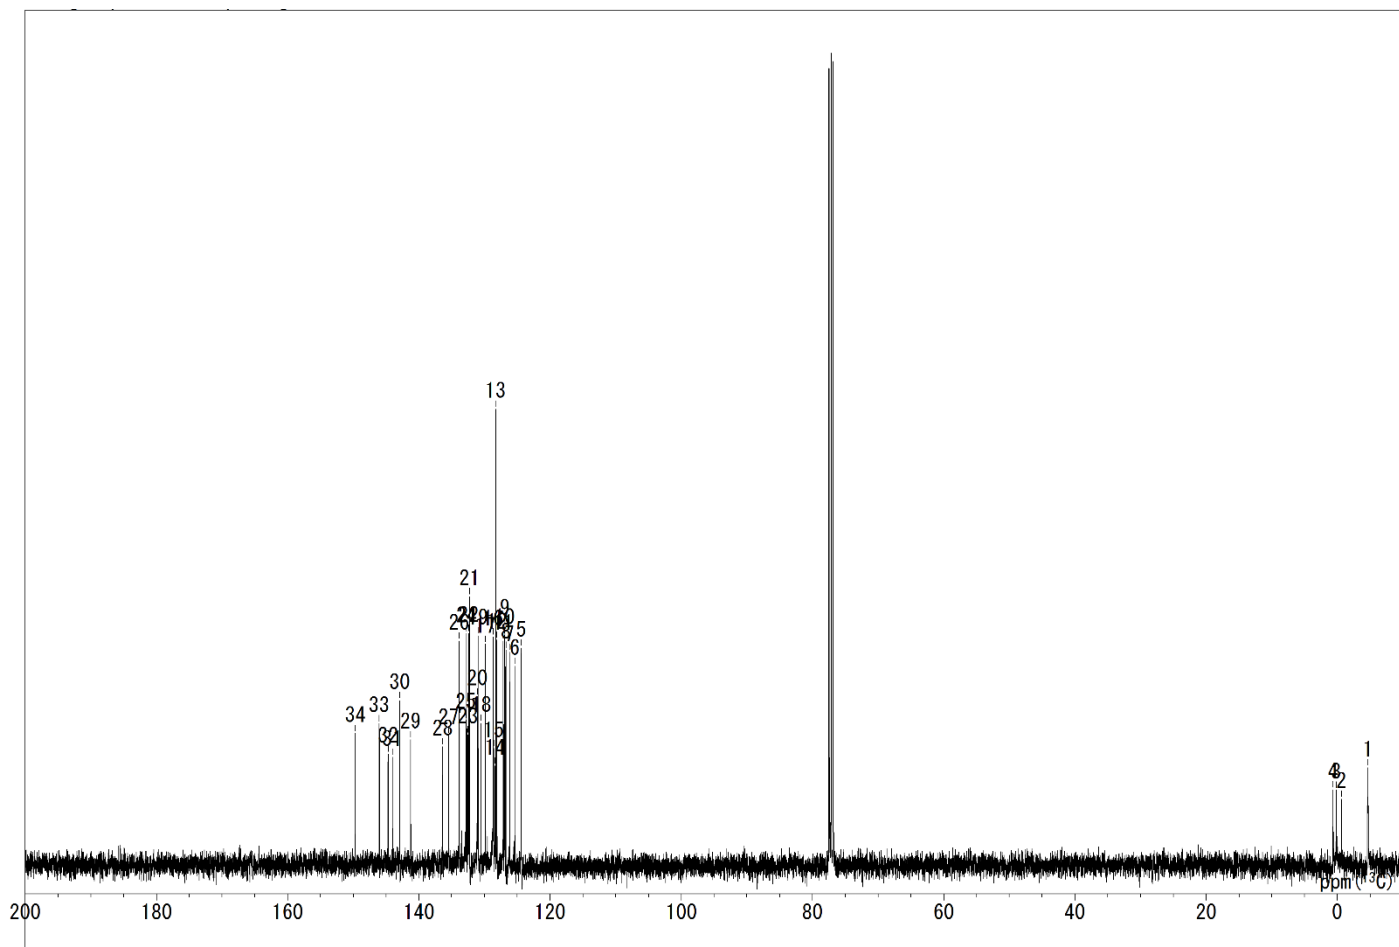

| No. | Start (ppm) | End (ppm) | Integral |
|-----|-------------|-----------|----------|
| 1   | -0.1959     | -0.3975   | 3.0314   |
| 2   | 0.4015      | 0.2149    | 3.0113   |
| 3   | 0.7028      | 0.5875    | 3.0039   |
| 4   | 0.8282      | 0.7028    | 3.0519   |
| 5   | 6.9532      | 6.8618    | 1.0153   |
| 6   | 7.1256      | 6.9766    | 4.0995   |
| 7   | 7.2196      | 7.1347    | 2.0999   |
| 8   | 7.3436      | 7.2248    | 3.3556   |
| 9   | 7.6641      | 7.5262    | 2.0761   |
| 10  | 7.8488      | 7.7542    | 1.0228   |
| 11  | 7.9329      | 7.8593    | 1.0072   |
| 12  | 8.0265      | 7.9442    | 1.0004   |
| 13  | 8.4624      | 8.3634    | 1.0      |

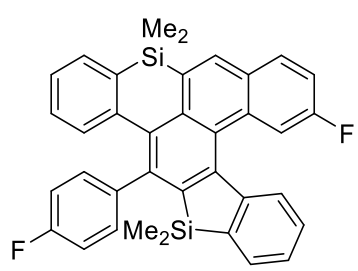

2c

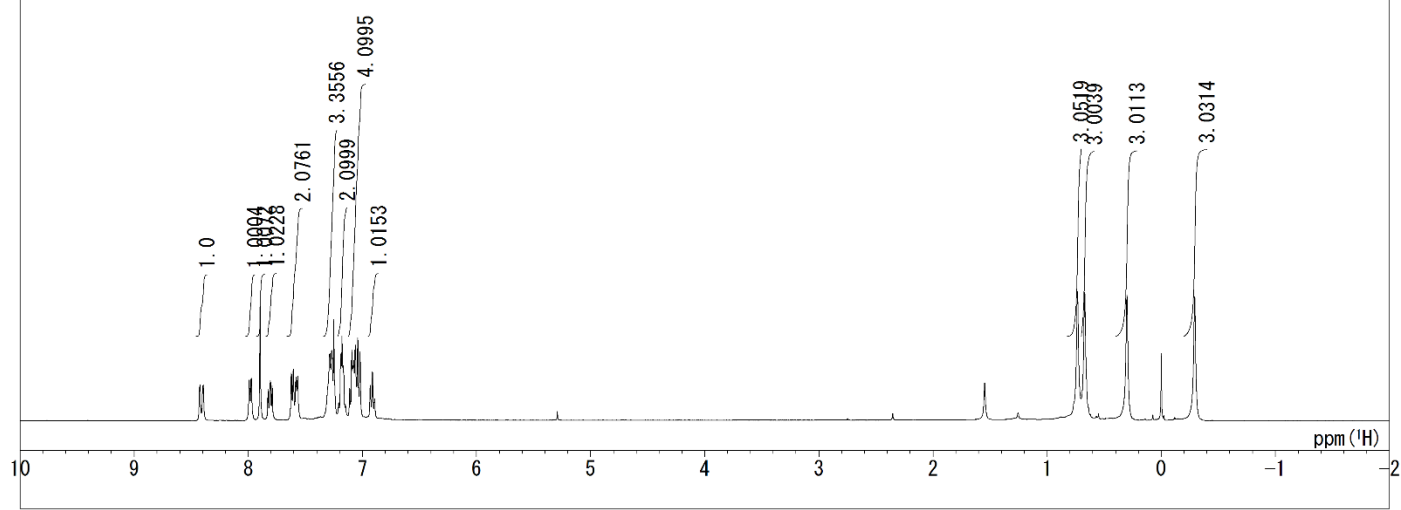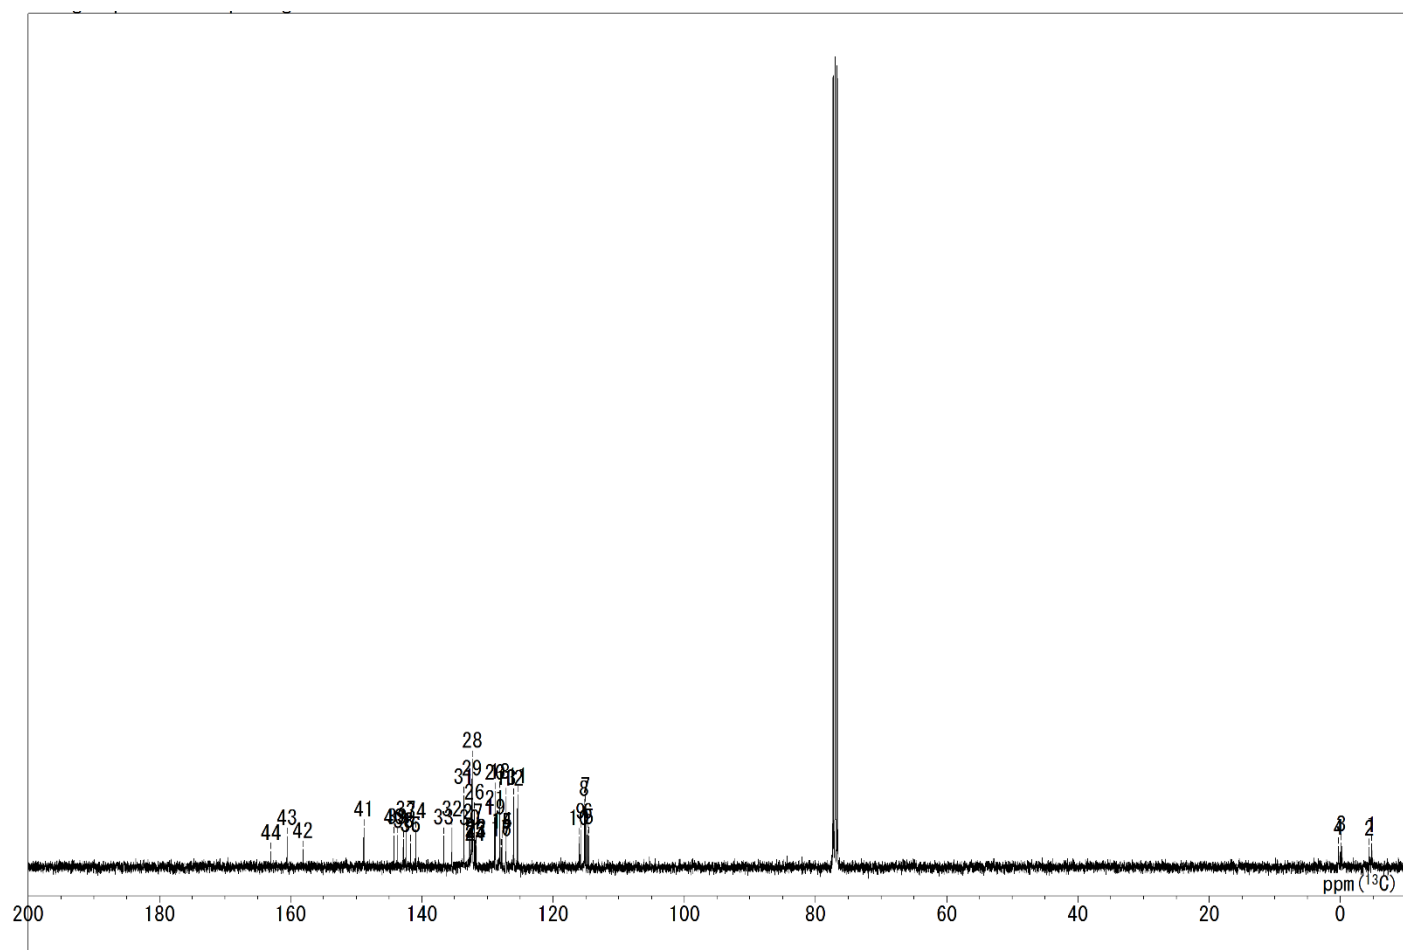

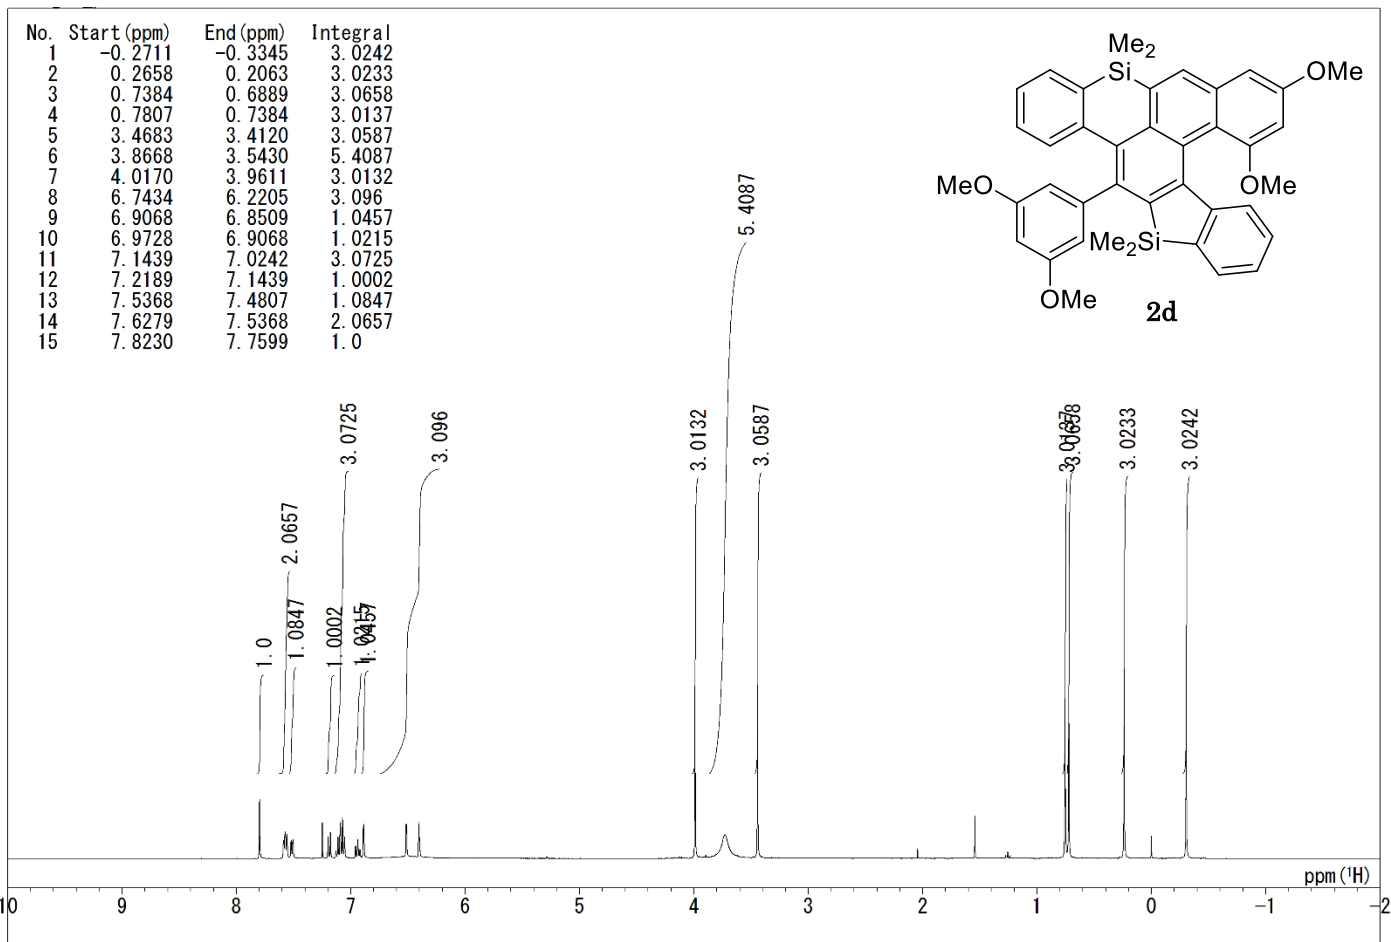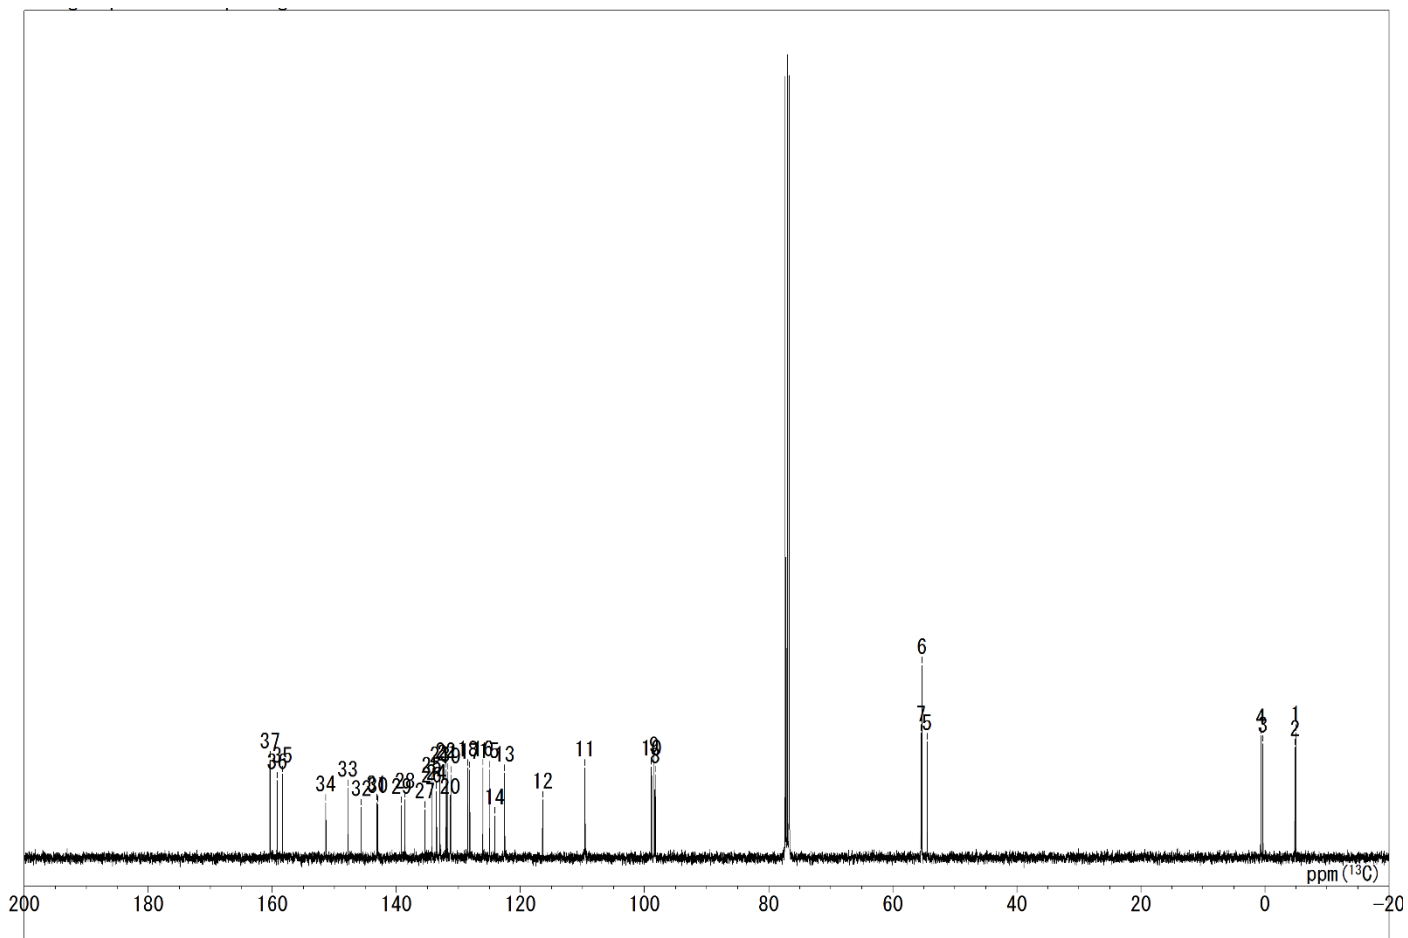

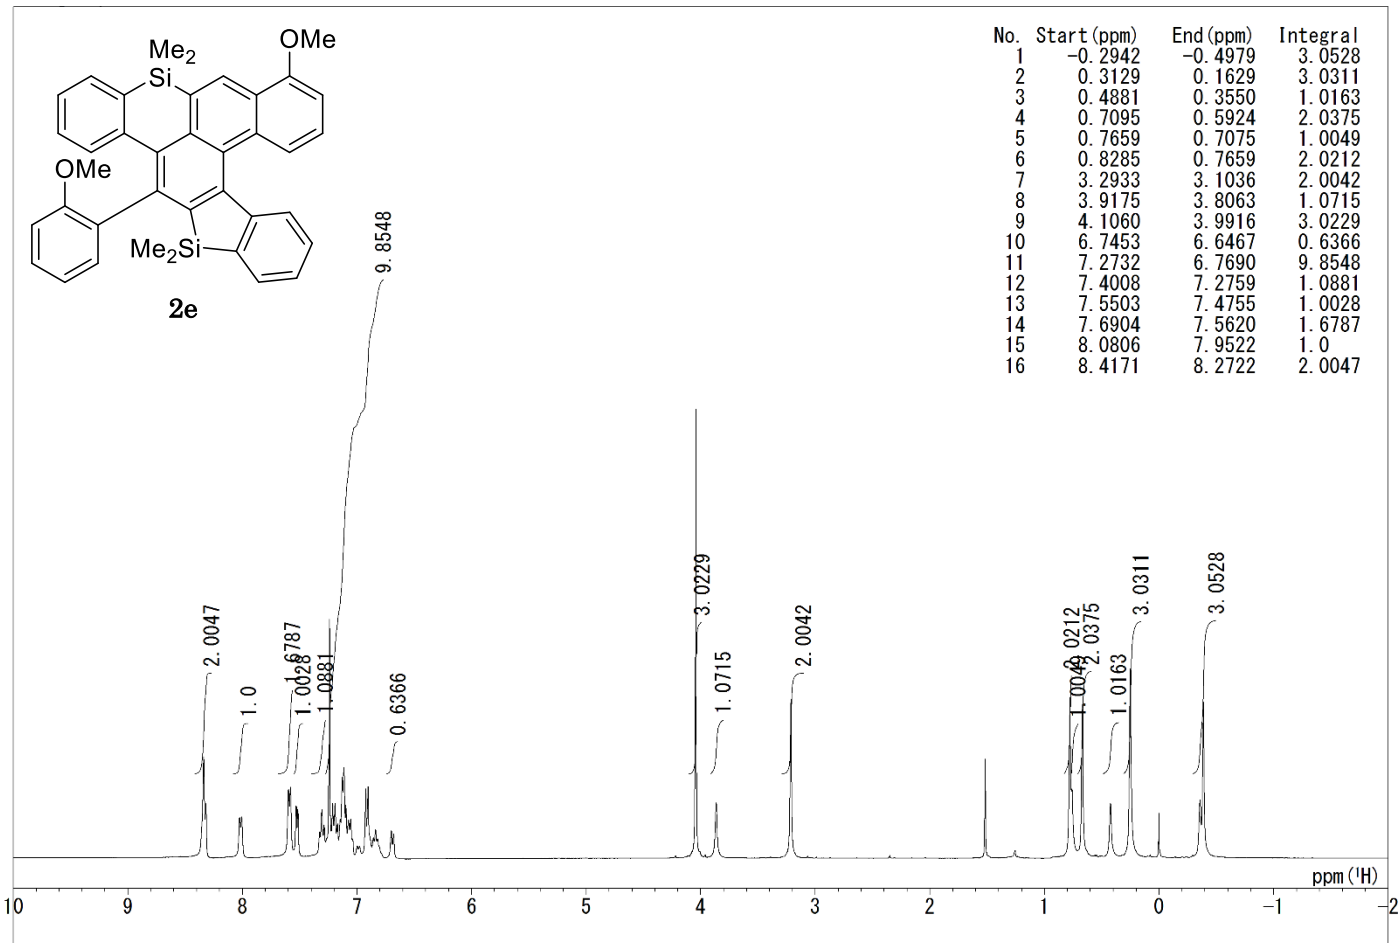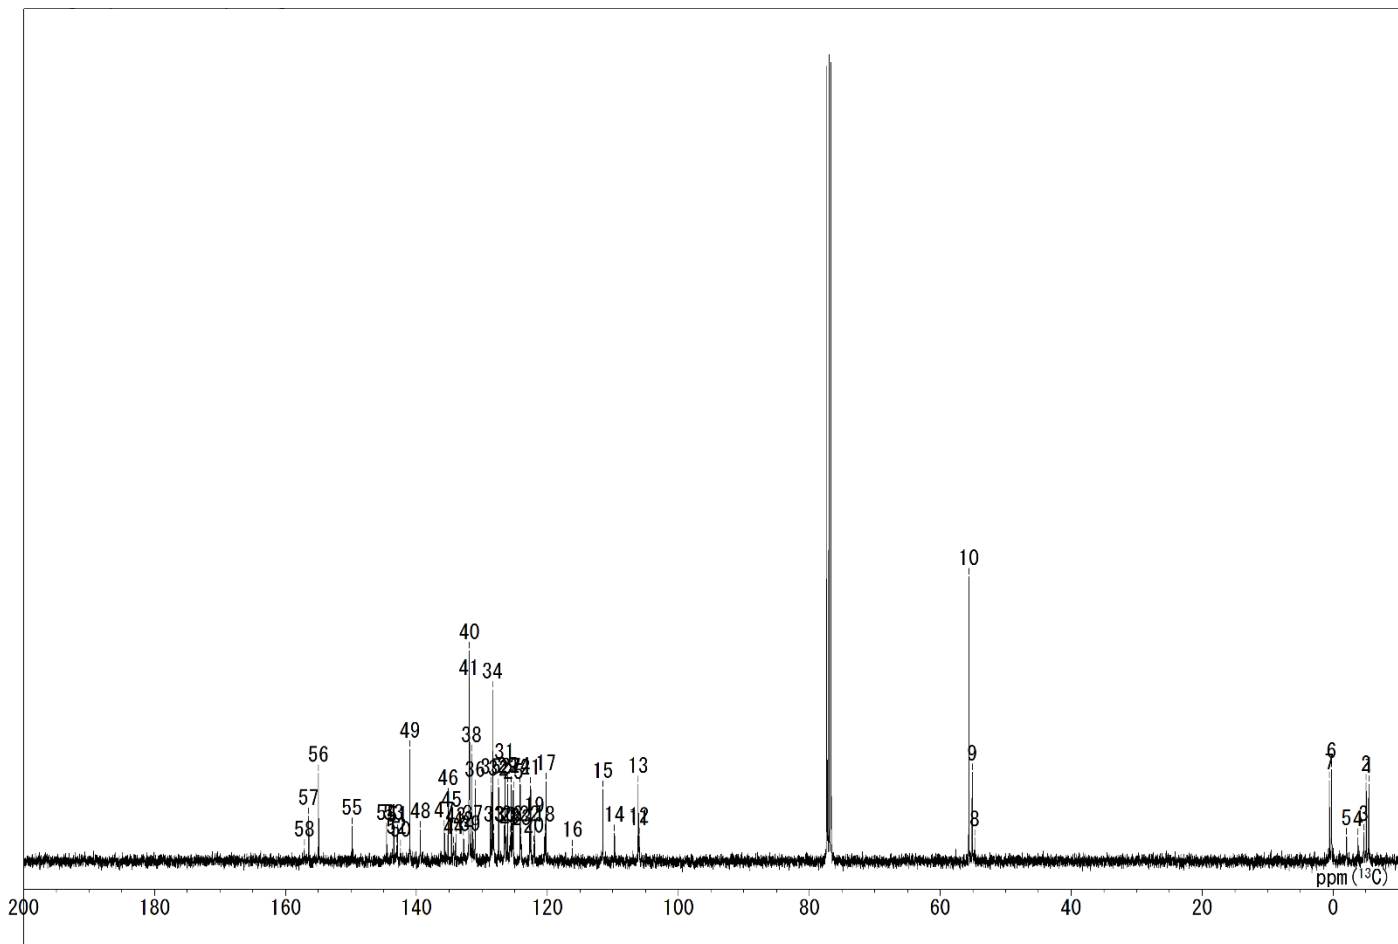



| No. | Start (ppm) | End (ppm) | Integral |
|-----|-------------|-----------|----------|
| 1   | -0.2198     | -0.4085   | 3.0572   |
| 2   | 0.4148      | 0.2764    | 3.0501   |
| 3   | 0.7327      | 0.6284    | 3.0546   |
| 4   | 0.8230      | 0.7327    | 3.0226   |
| 5   | 6.9323      | 6.8345    | 1.03     |
| 6   | 7.1218      | 7.0117    | 1.0066   |
| 7   | 7.2224      | 7.1248    | 3.0869   |
| 8   | 7.5226      | 7.2606    | 8.0645   |
| 9   | 7.6605      | 7.5262    | 6.0879   |
| 10  | 7.7347      | 7.6605    | 2.0483   |
| 11  | 7.8186      | 7.7418    | 1.007    |
| 12  | 7.9310      | 7.8448    | 1.0631   |
| 13  | 8.0172      | 7.9310    | 1.0184   |
| 14  | 8.2423      | 8.1369    | 1.0142   |
| 15  | 9.0395      | 8.9462    | 1.0      |

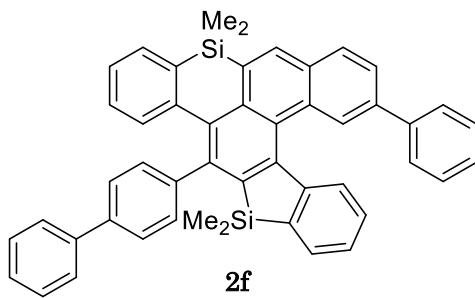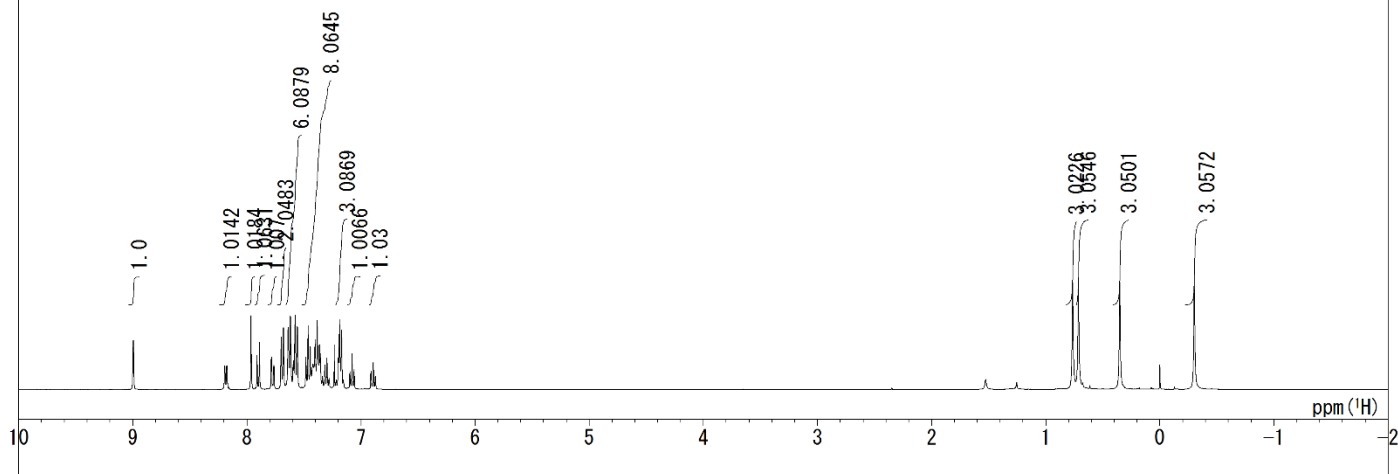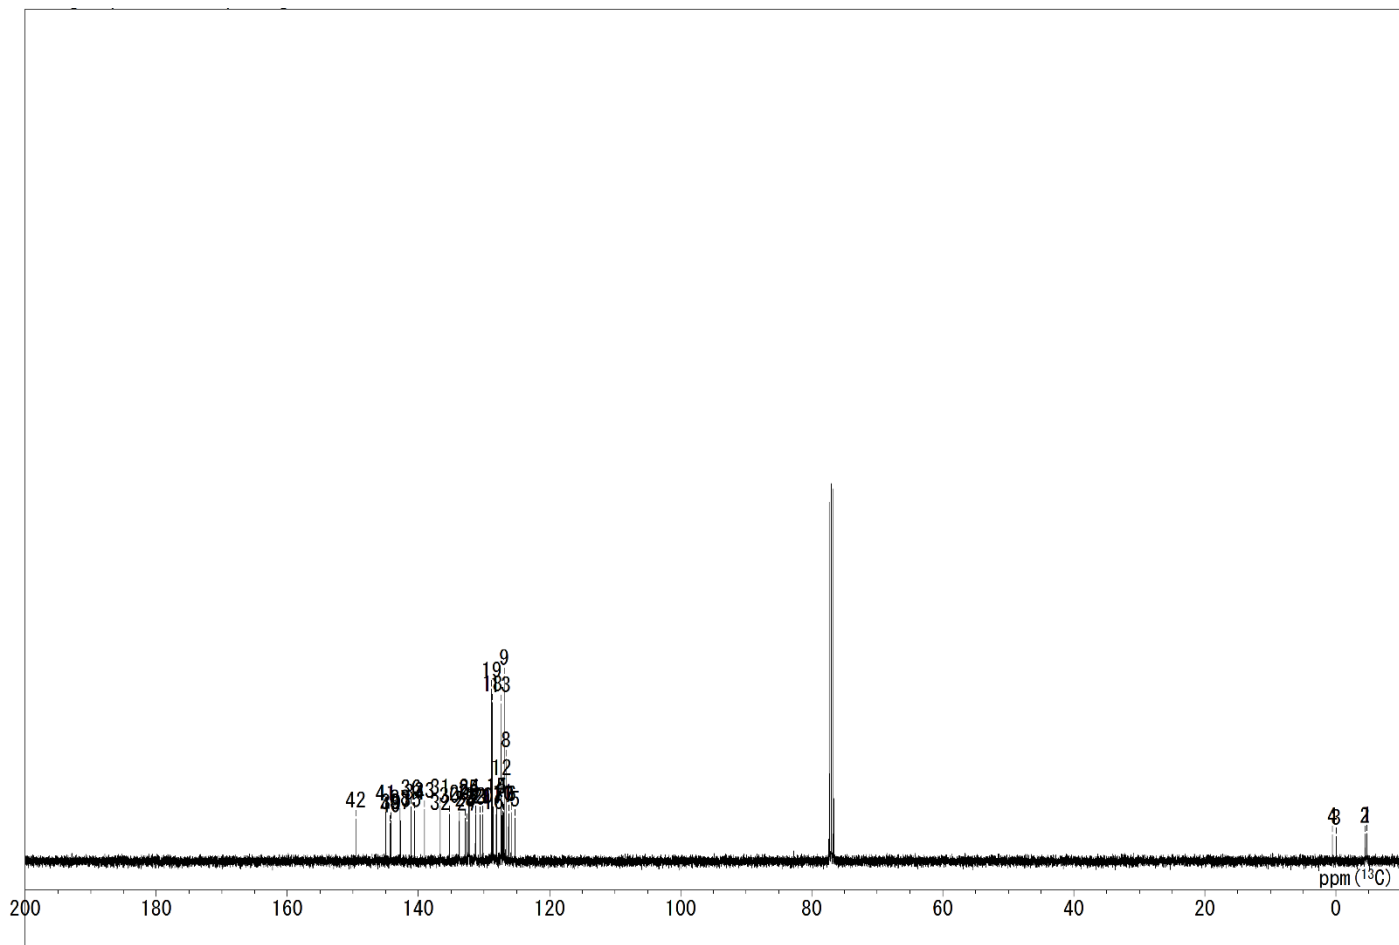

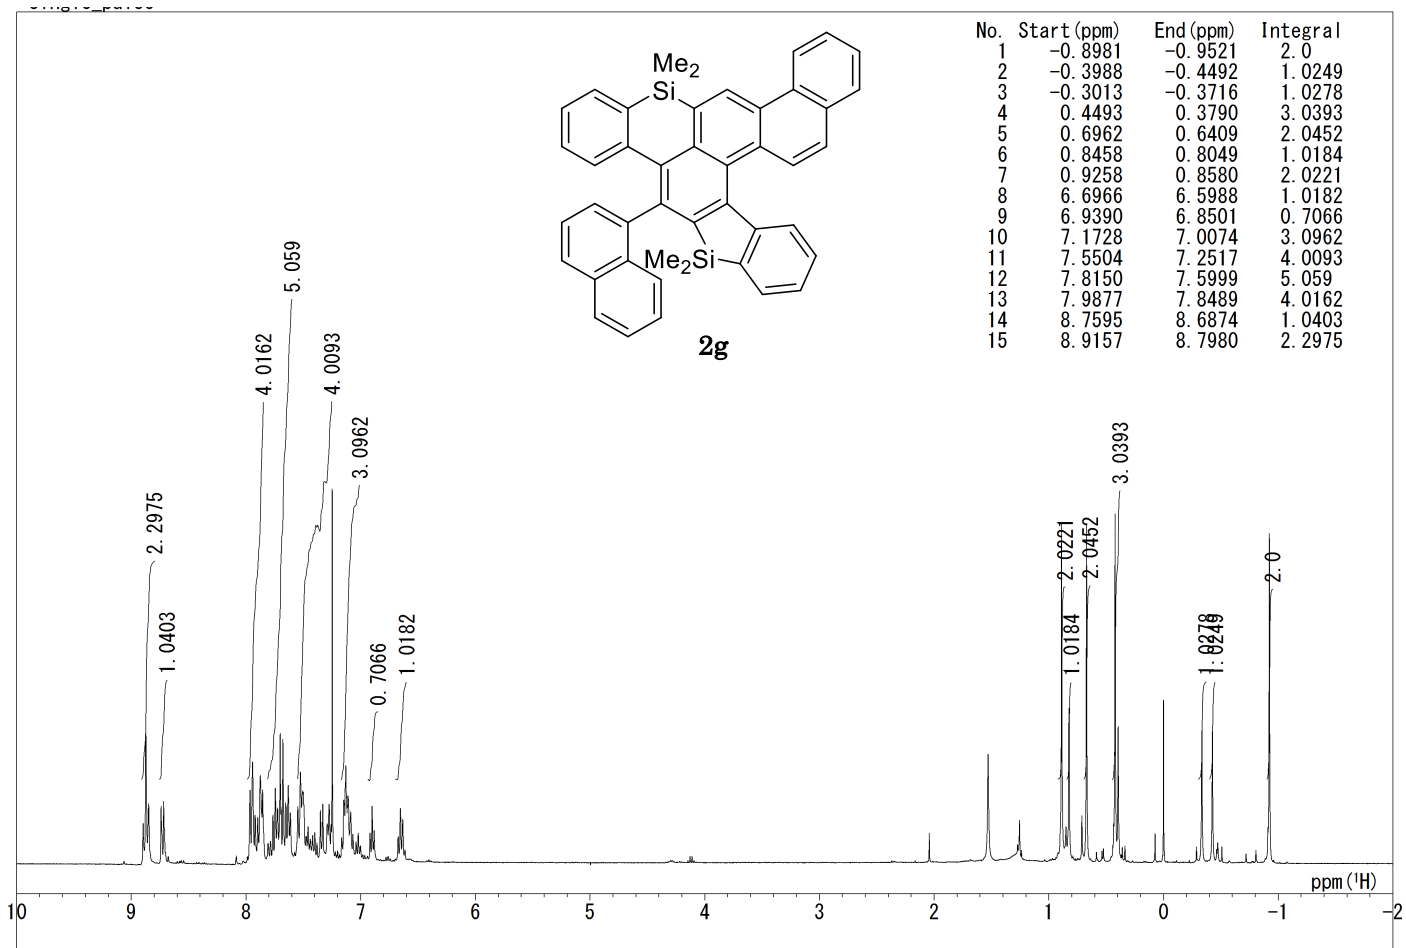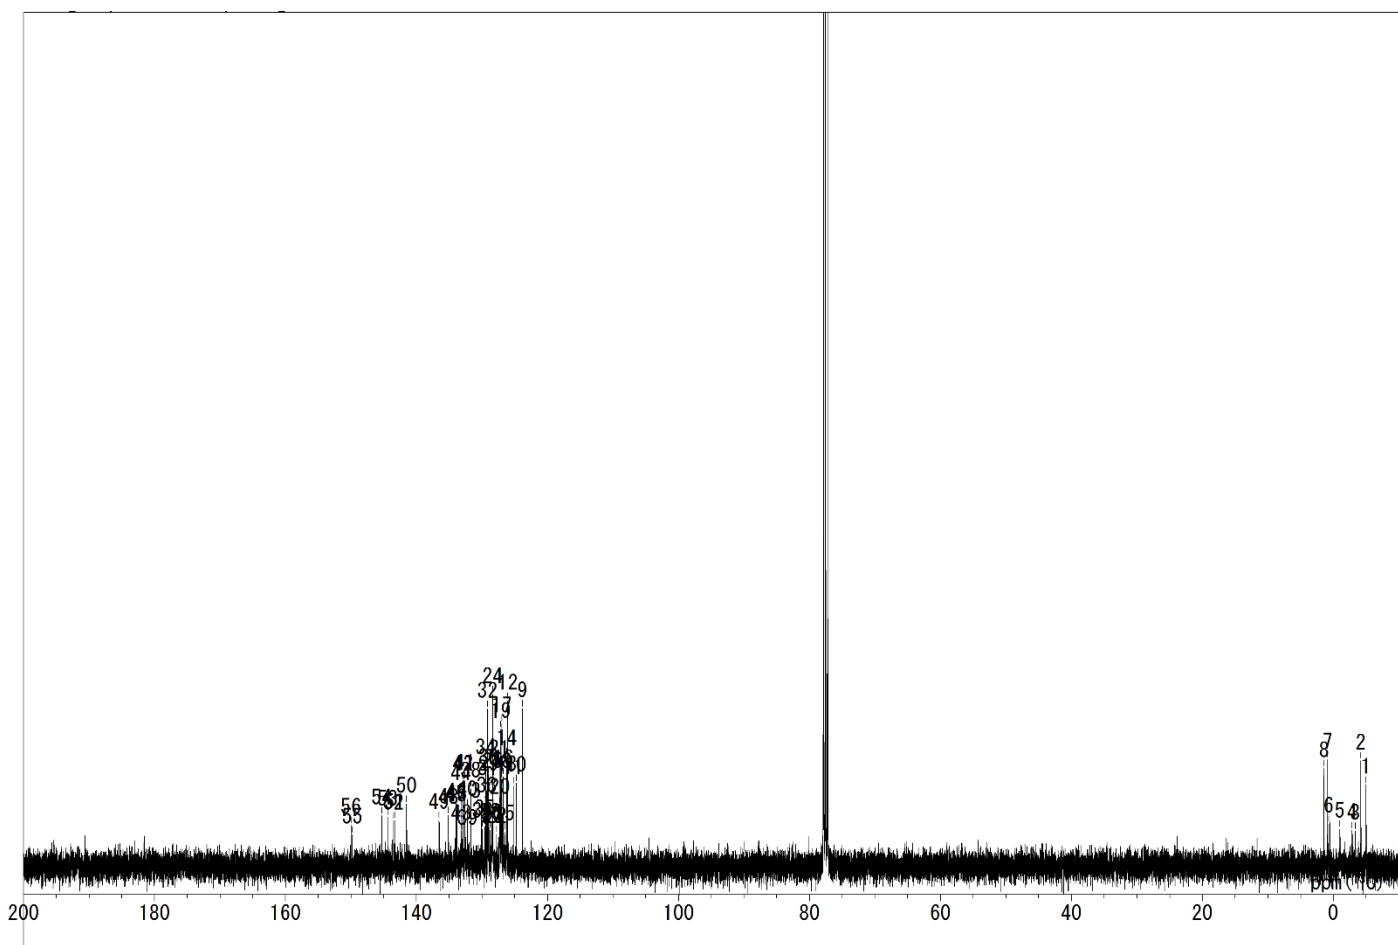

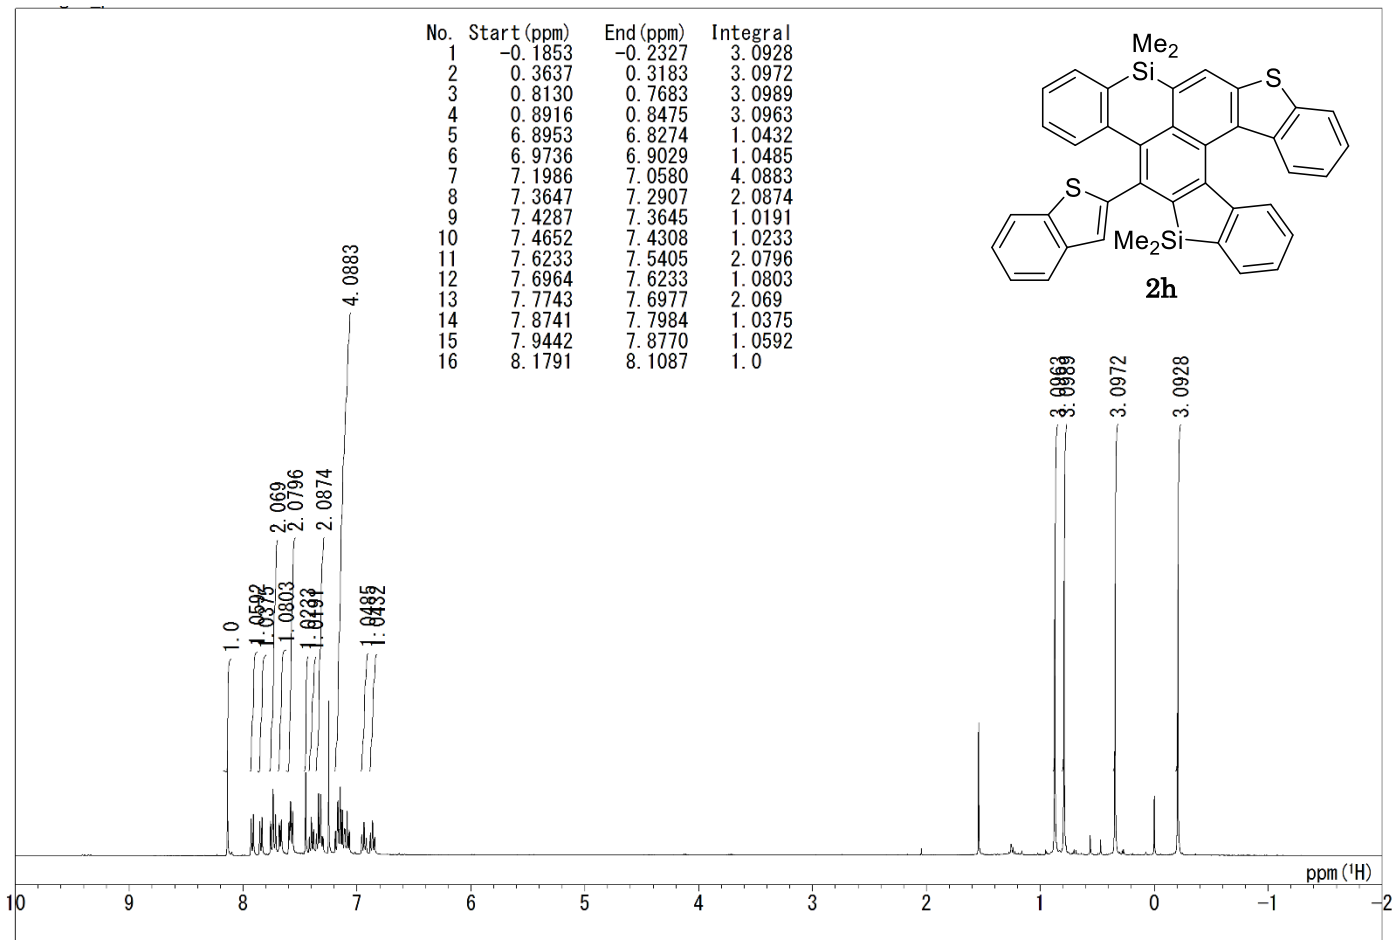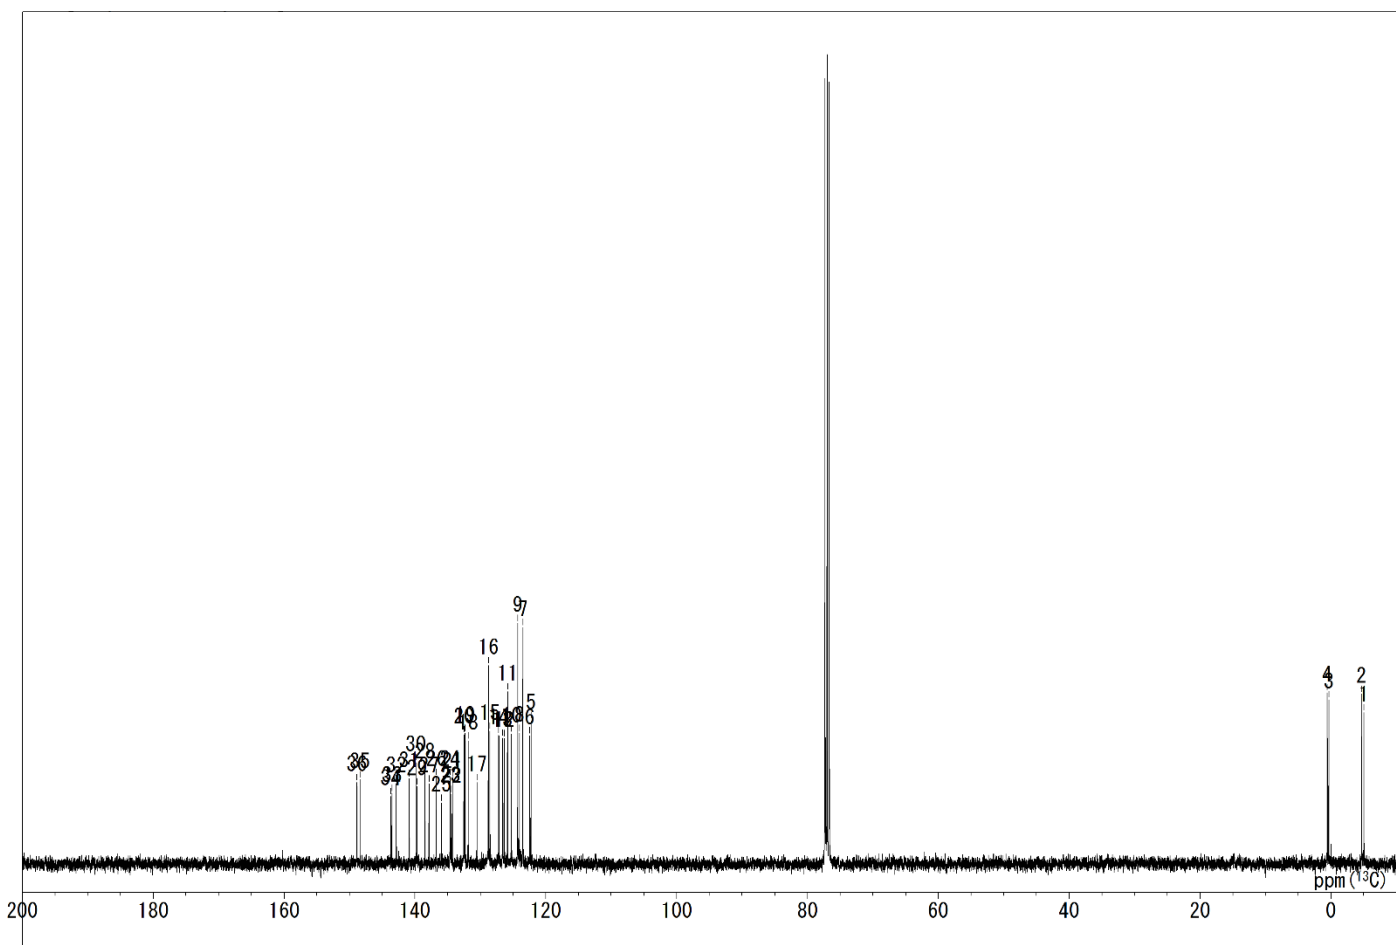

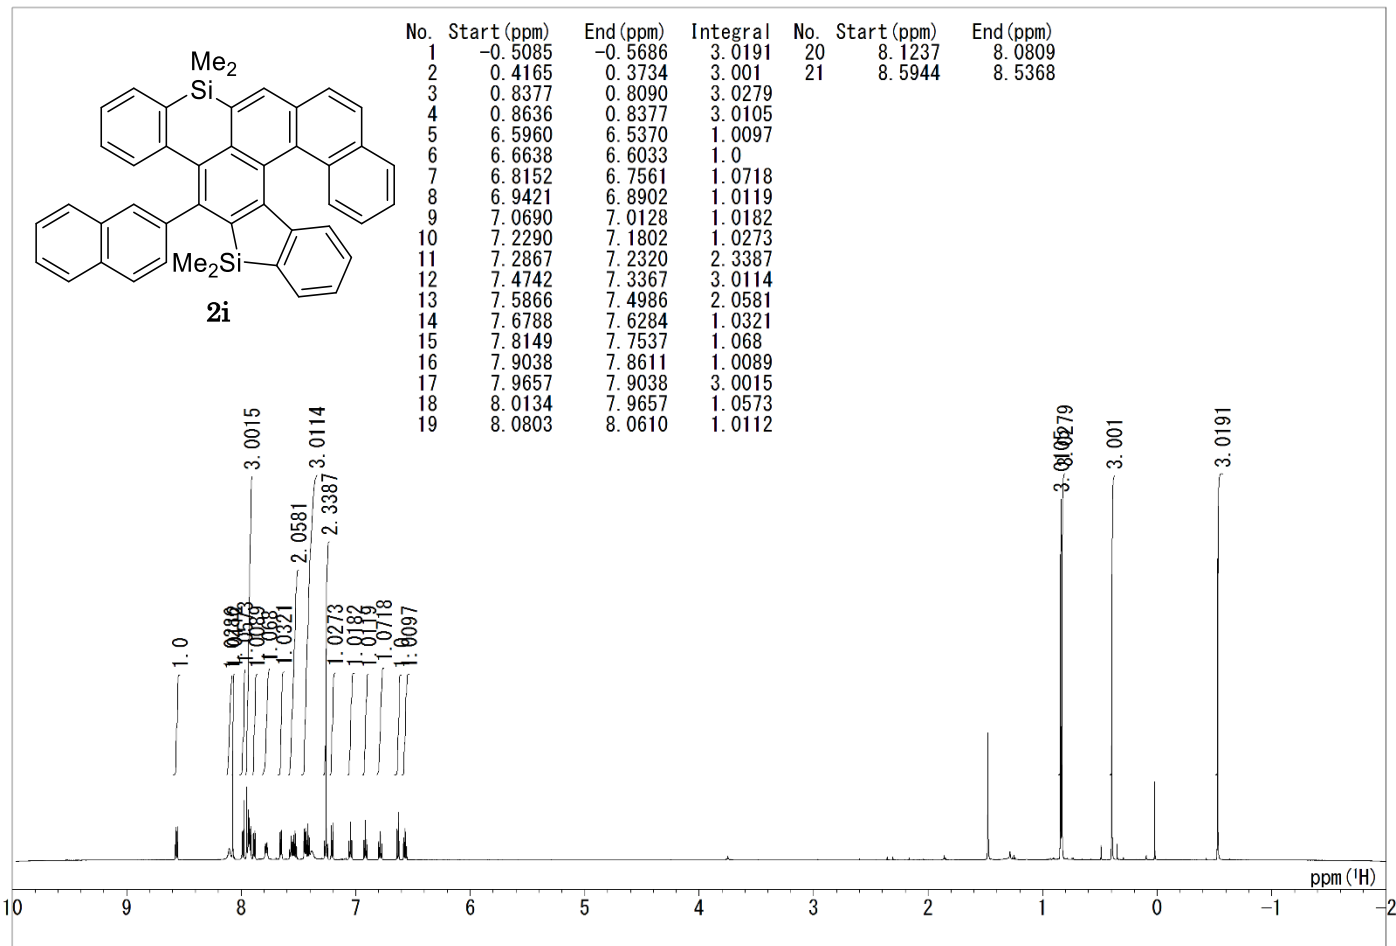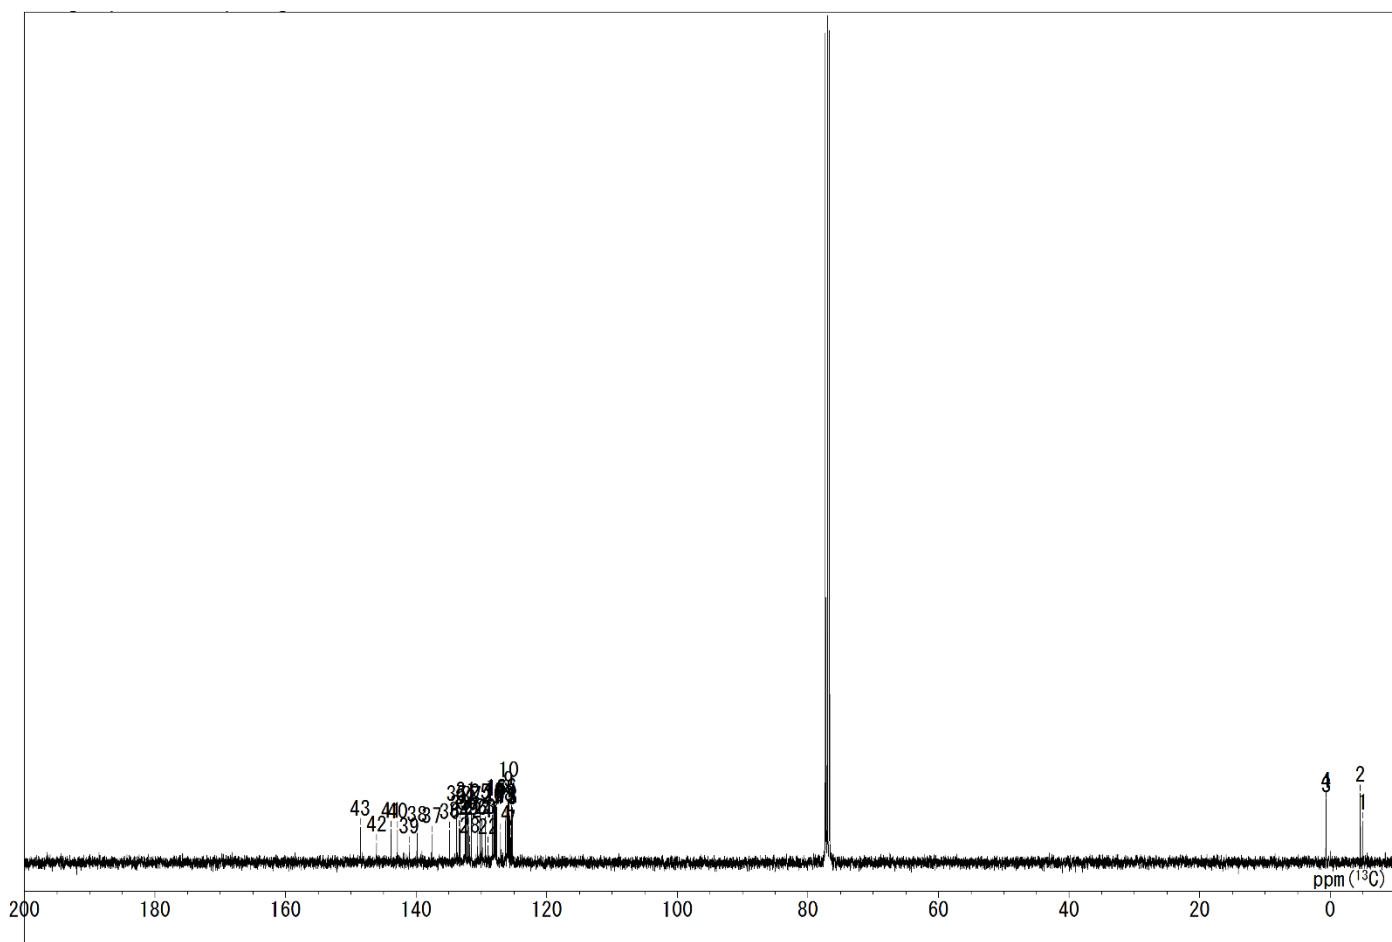

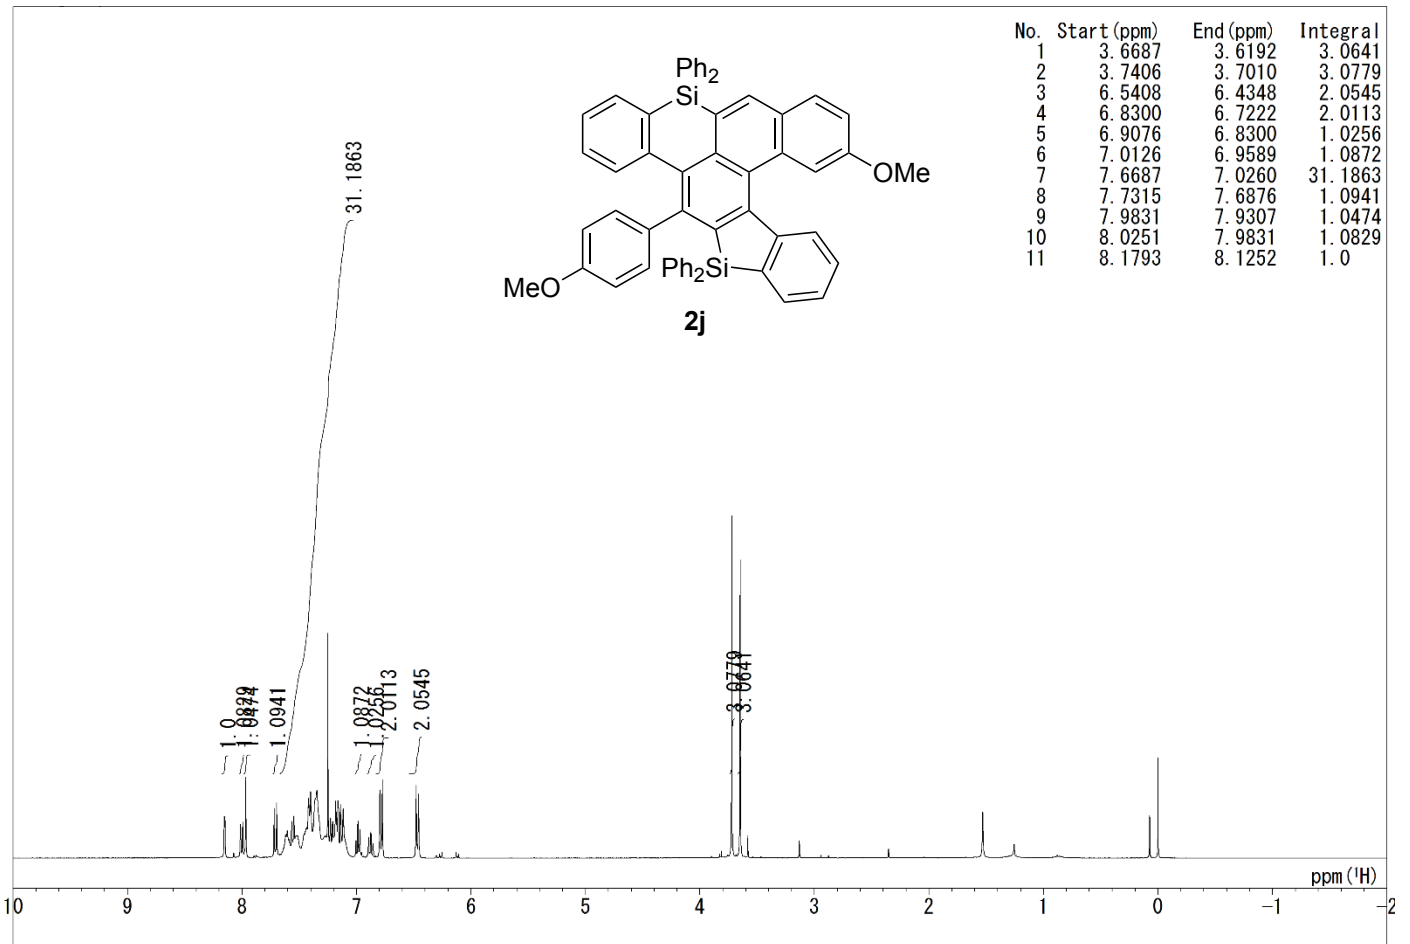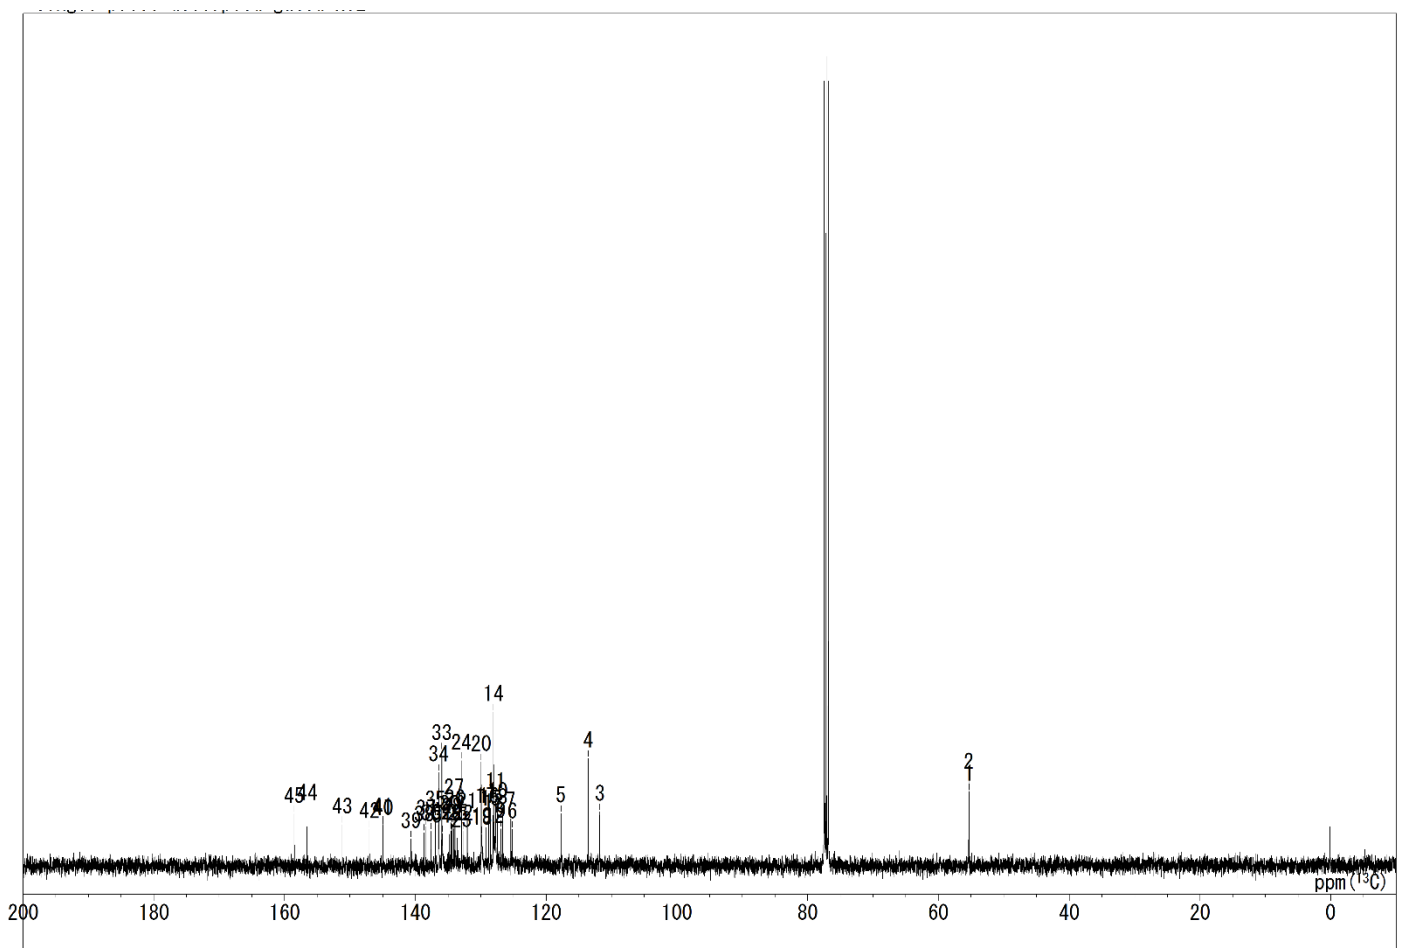

| No. | Start (ppm) | End (ppm) | Integral |
|-----|-------------|-----------|----------|
| 1   | -0.3881     | -0.4637   | 6.0358   |
| 2   | -0.2689     | -0.3883   | 6.0367   |
| 3   | 0.1373      | 0.0777    | 6.0972   |
| 4   | 0.4338      | 0.3197    | 6.0772   |
| 5   | 3.7664      | 3.7197    | 6.0209   |
| 6   | 3.8032      | 3.7664    | 6.0891   |
| 7   | 6.1367      | 6.0335    | 2.0      |
| 8   | 6.4666      | 6.3904    | 2.0271   |
| 9   | 6.5645      | 6.4988    | 2.0829   |
| 10  | 6.7268      | 6.6641    | 4.0124   |
| 11  | 6.7812      | 6.7268    | 2.0914   |
| 12  | 6.8901      | 6.7913    | 4.0874   |
| 13  | 6.9466      | 6.8901    | 2.0663   |
| 14  | 7.0842      | 7.0226    | 2.0595   |
| 15  | 7.1477      | 7.0842    | 4.0706   |
| 16  | 7.3767      | 7.3246    | 2.0049   |
| 17  | 7.4729      | 7.4189    | 2.091    |
| 18  | 7.5611      | 7.4839    | 4.0508   |

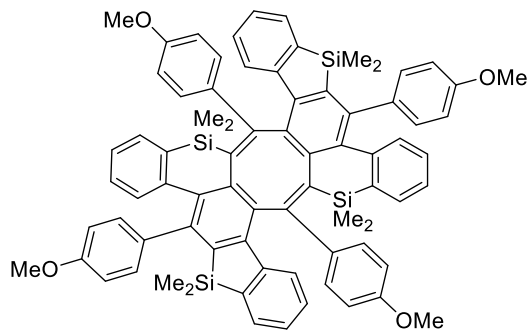

3a

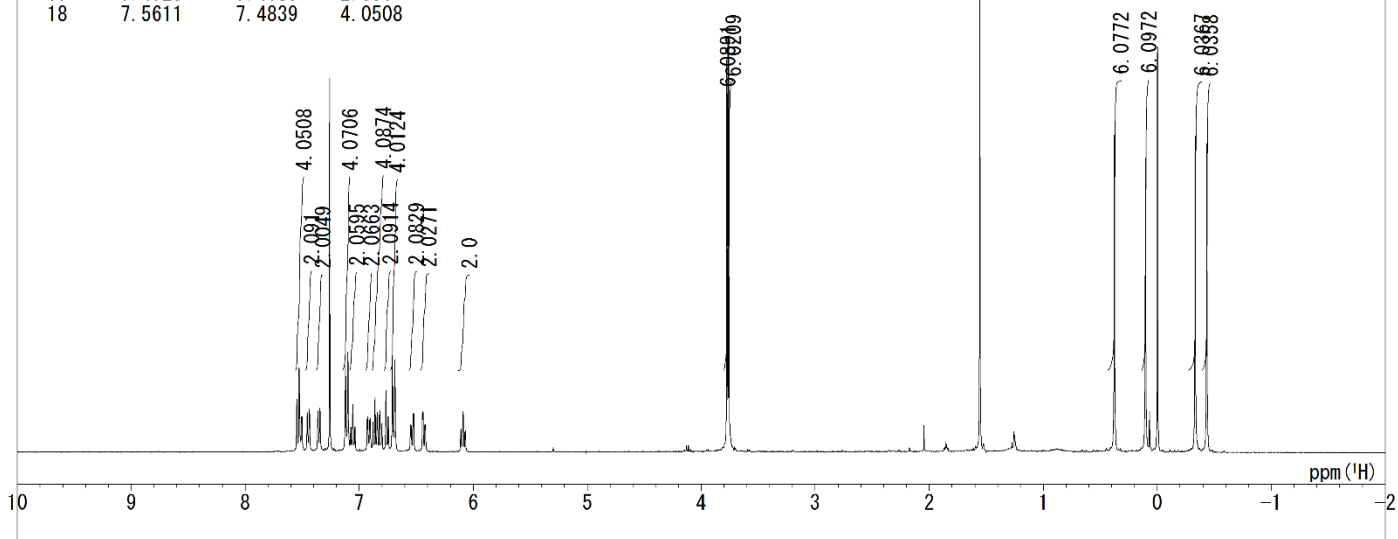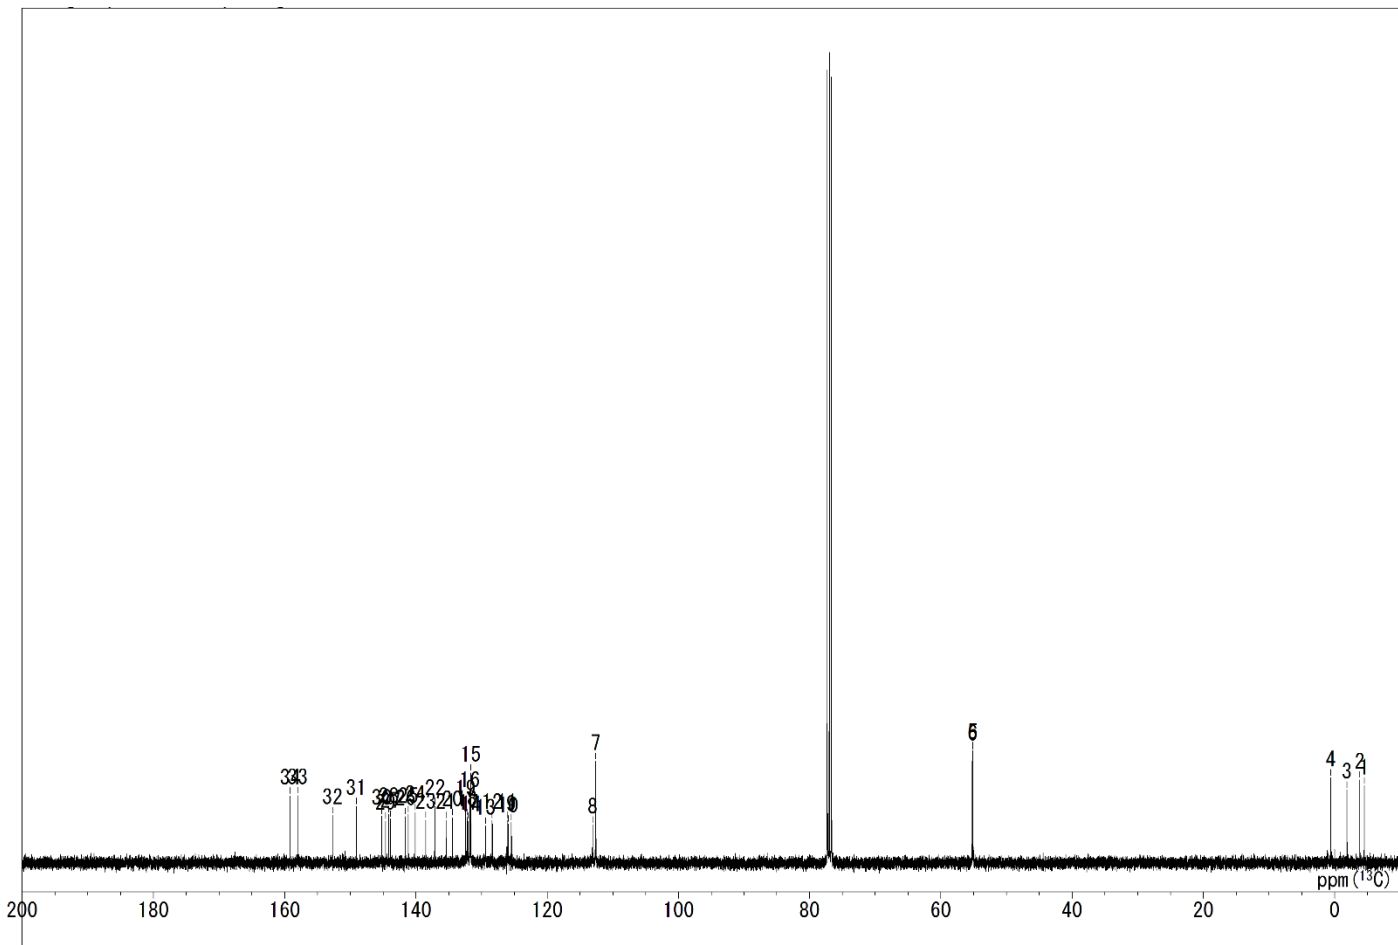

| No. | Start (ppm) | End (ppm) | Integral |
|-----|-------------|-----------|----------|
| 1   | -0.4097     | -0.4802   | 6.098    |
| 2   | -0.3447     | -0.4097   | 6.0485   |
| 3   | 0.0946      | 0.0577    | 6.0154   |
| 4   | 0.3996      | 0.3615    | 6.0851   |
| 5   | 6.1277      | 6.0375    | 2.0624   |
| 6   | 6.5488      | 6.4841    | 2.0874   |
| 7   | 6.8389      | 6.7258    | 4.0196   |
| 8   | 6.9035      | 6.8389    | 2.0304   |
| 9   | 7.0157      | 6.9507    | 2.0979   |
| 10  | 7.0991      | 7.0226    | 2.0054   |
| 11  | 7.2675      | 7.1337    | 13.8076  |
| 12  | 7.4154      | 7.3370    | 4.0977   |
| 13  | 7.4745      | 7.4154    | 2.0689   |
| 14  | 7.5826      | 7.5140    | 2.003    |
| 15  | 7.6651      | 7.5949    | 2.0      |

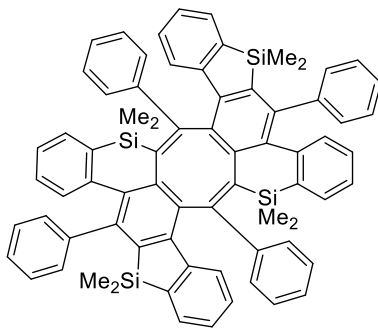

3b

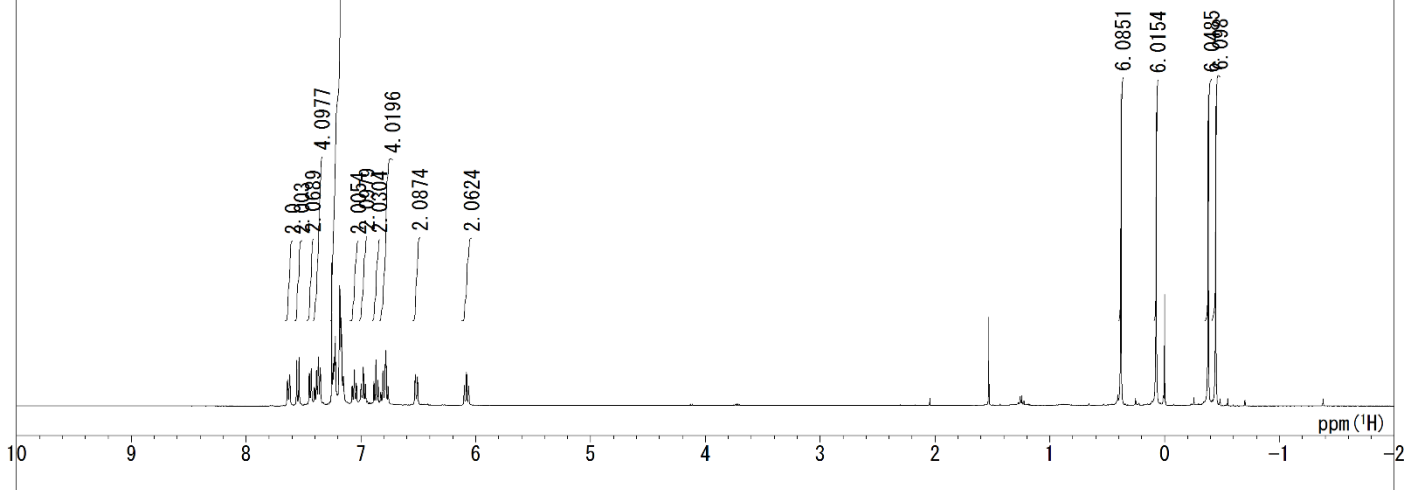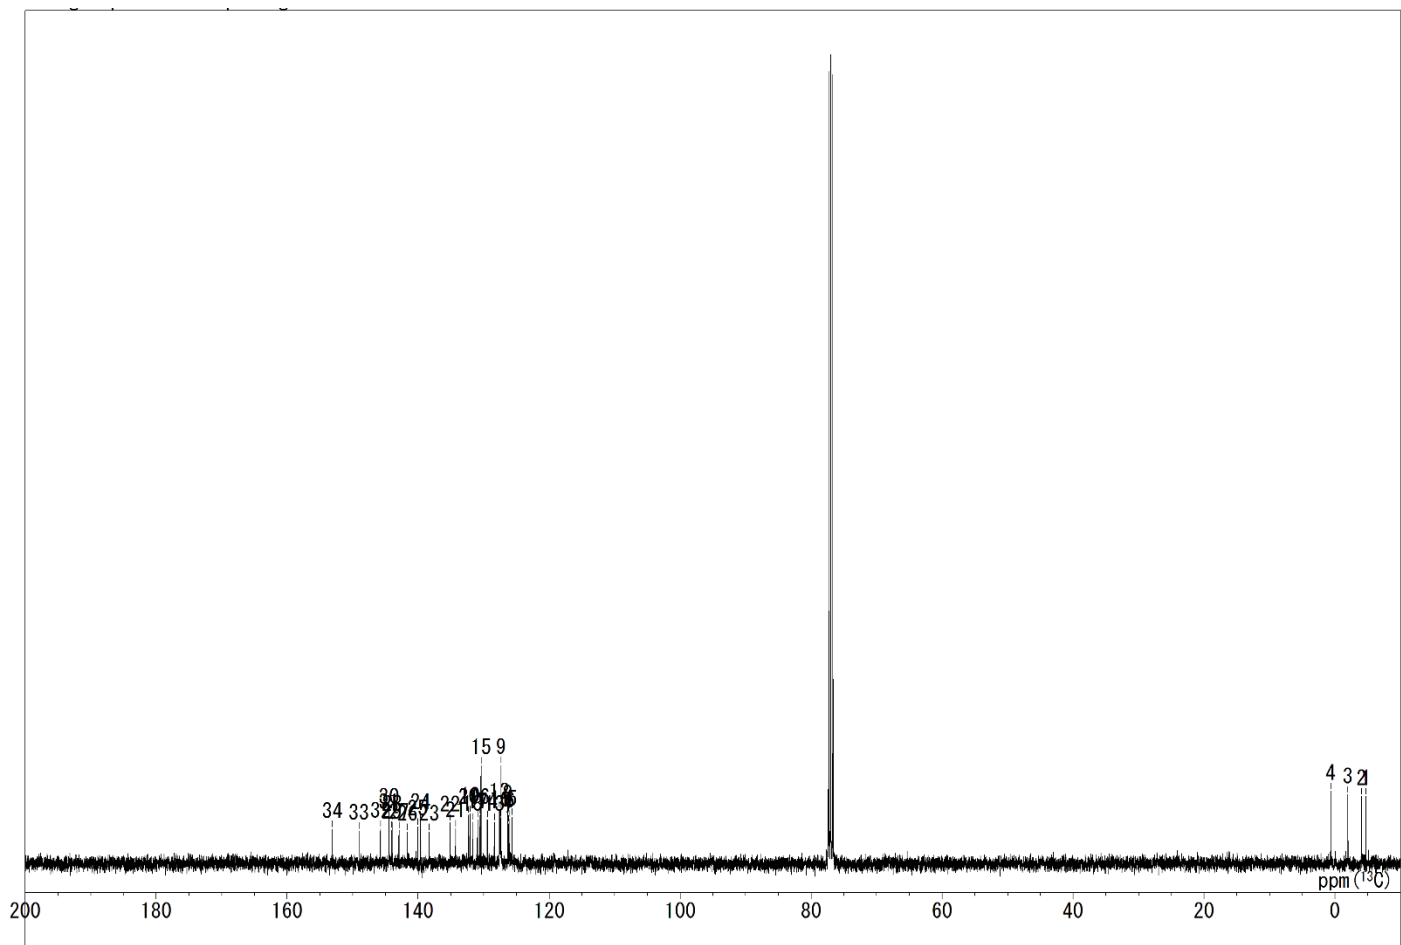

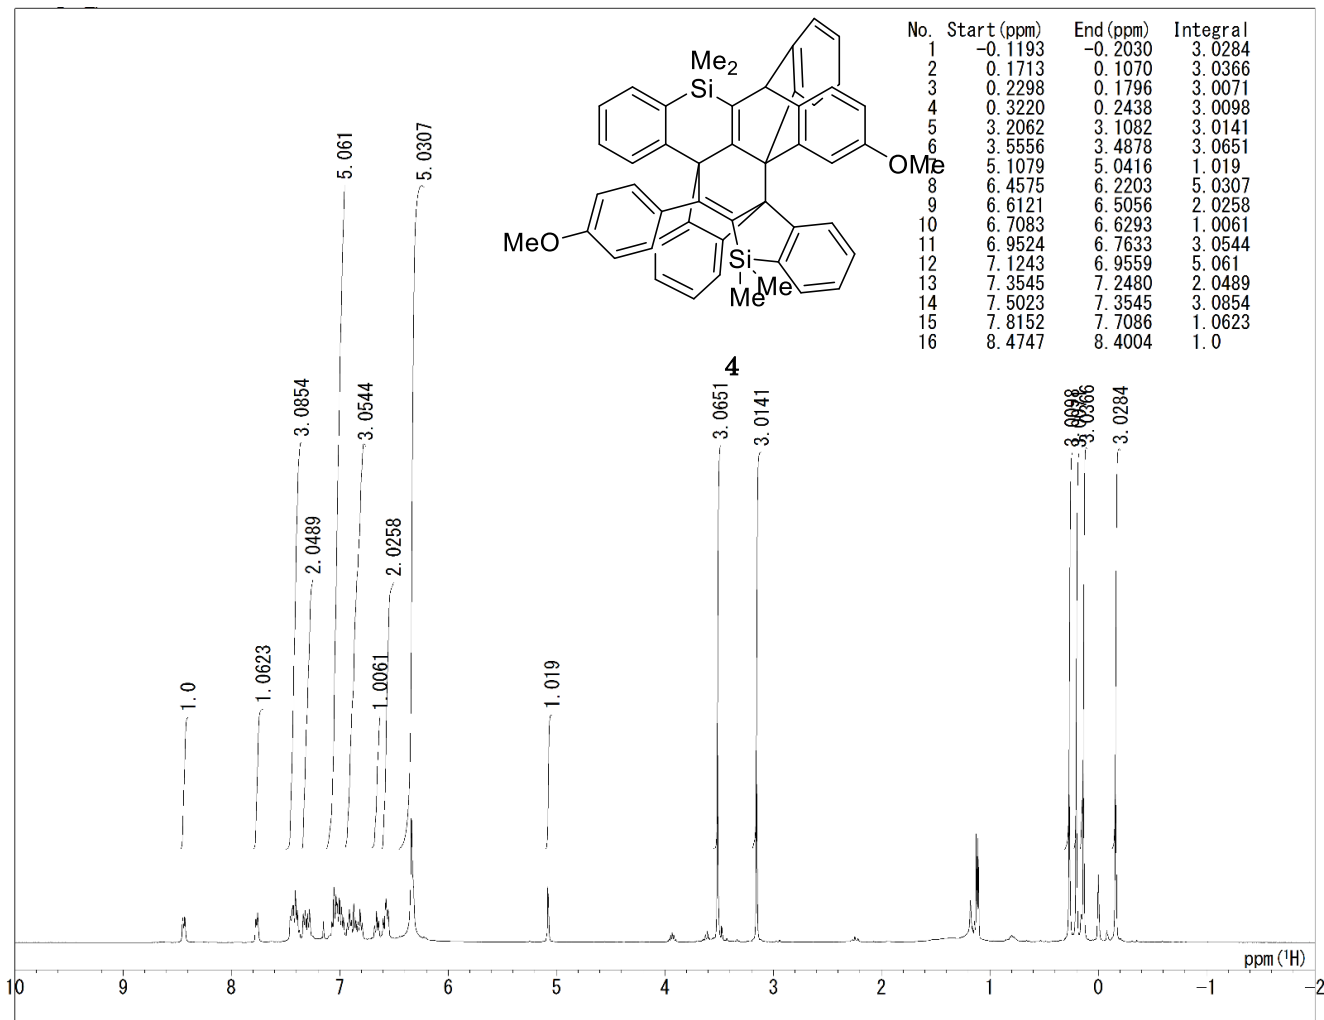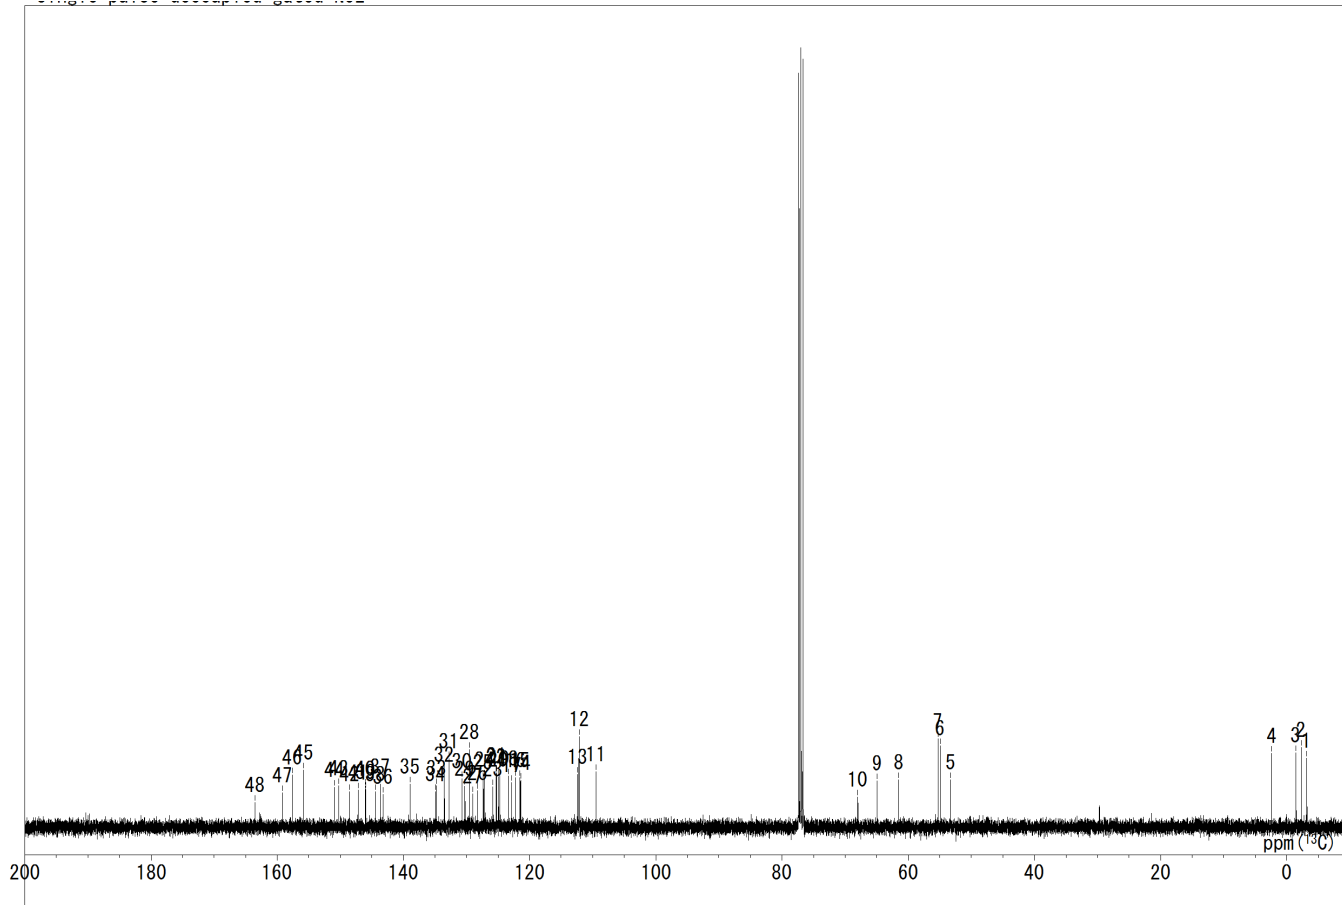



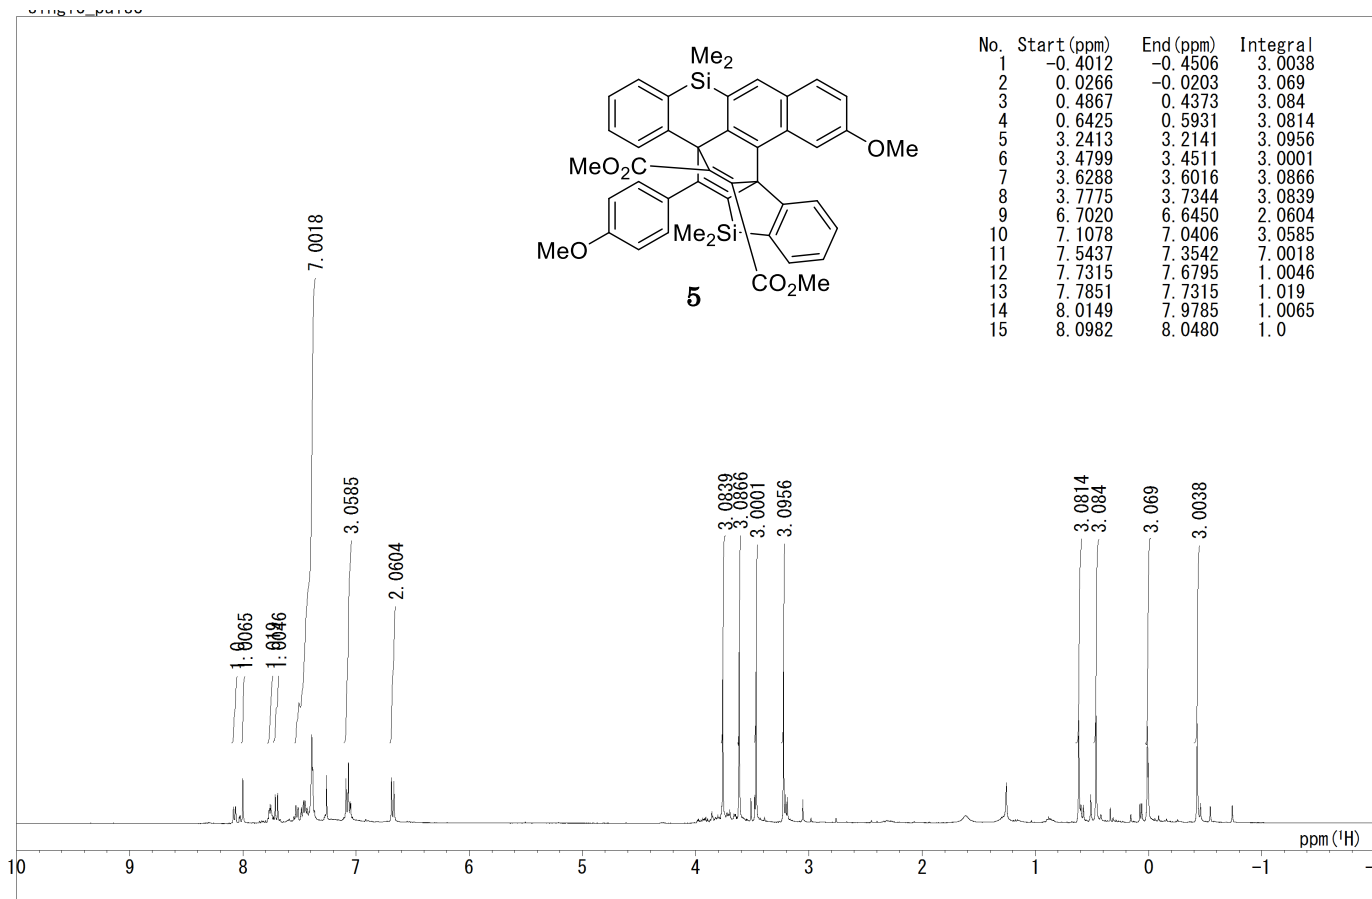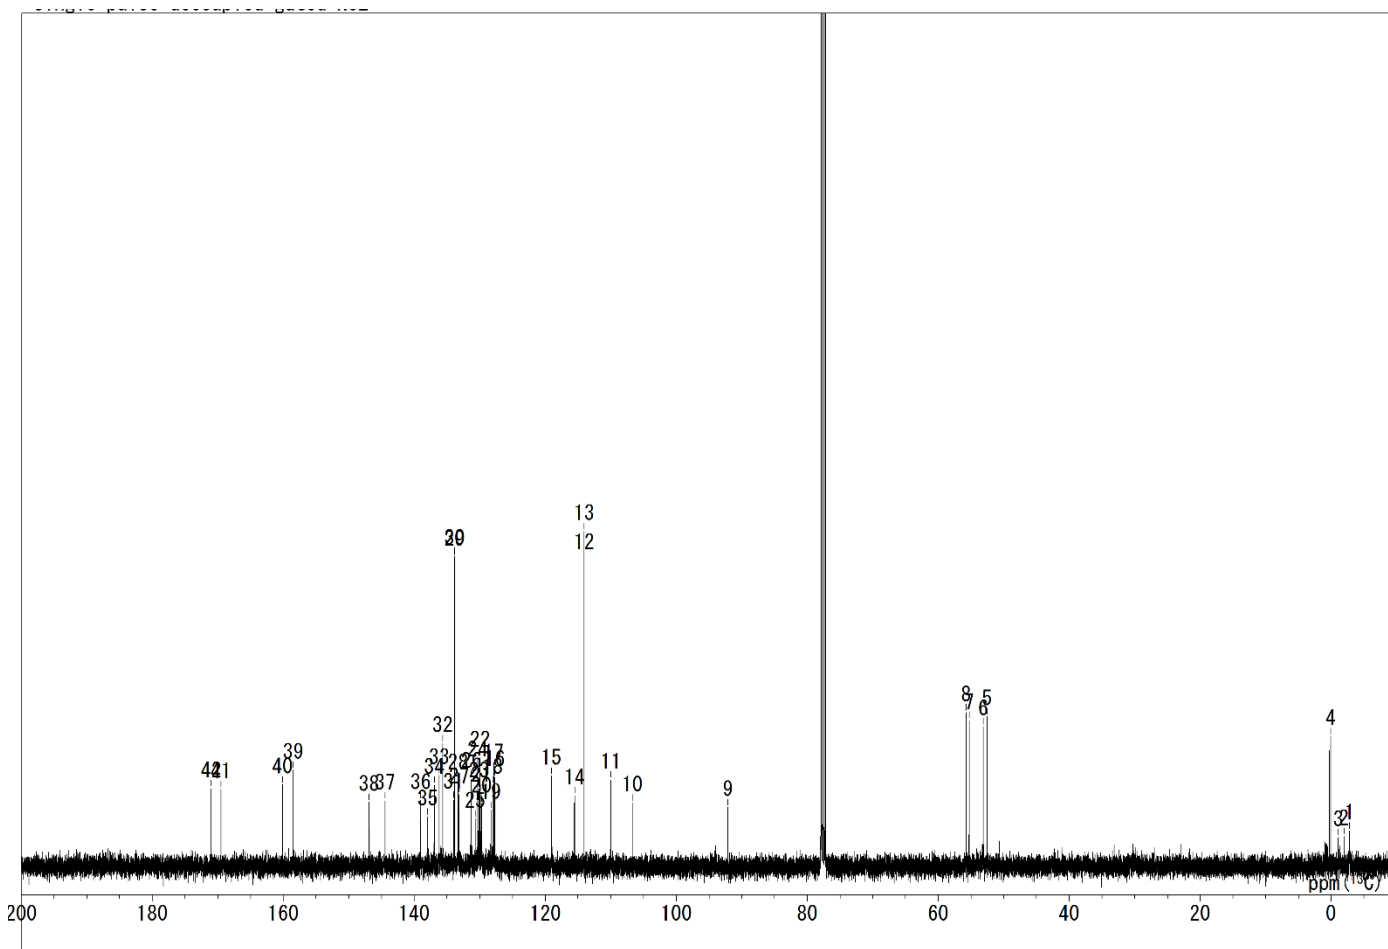

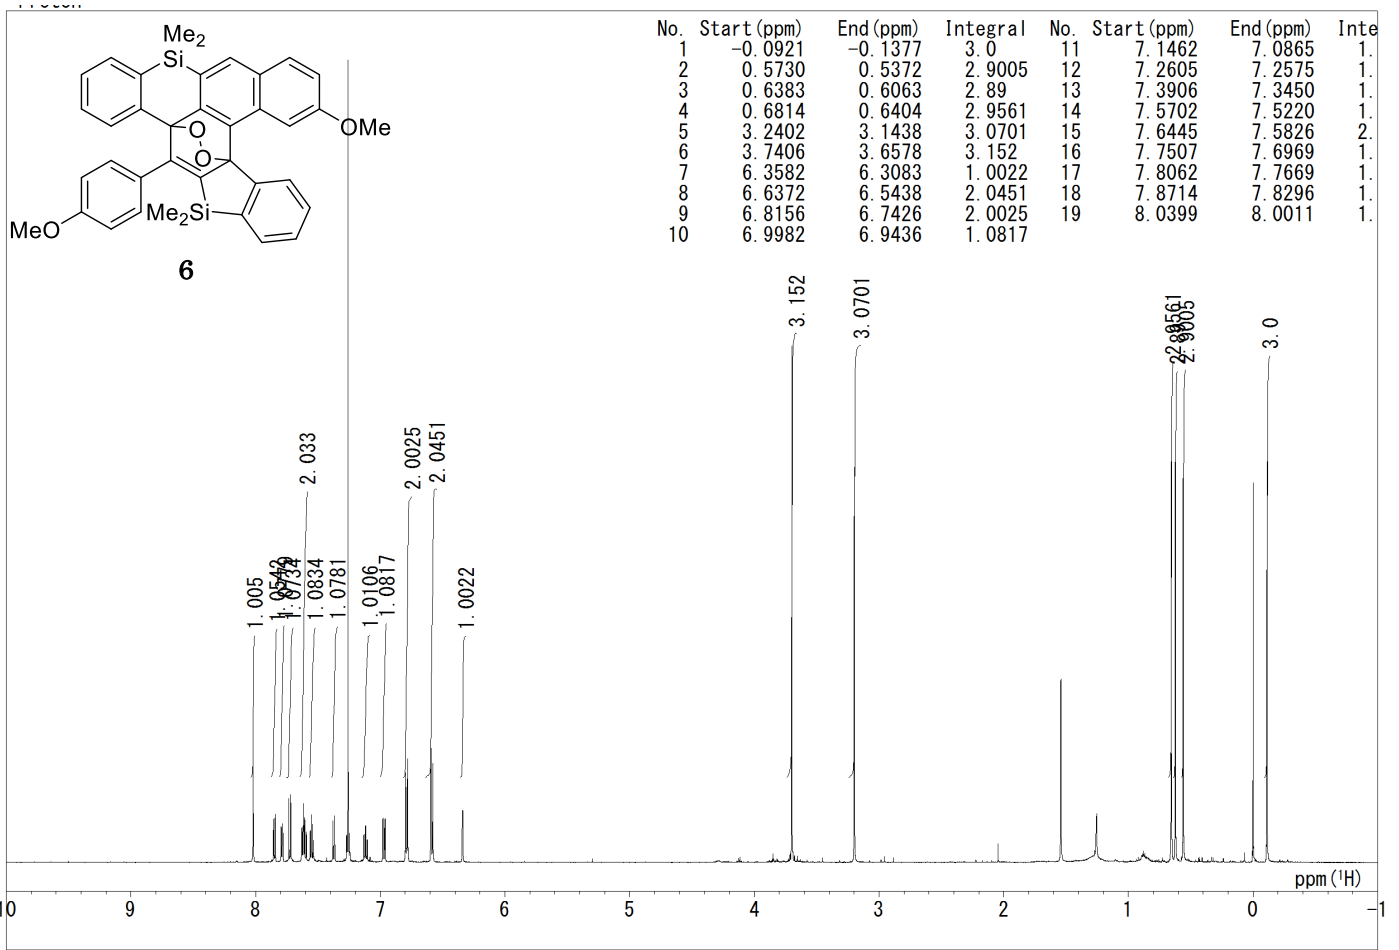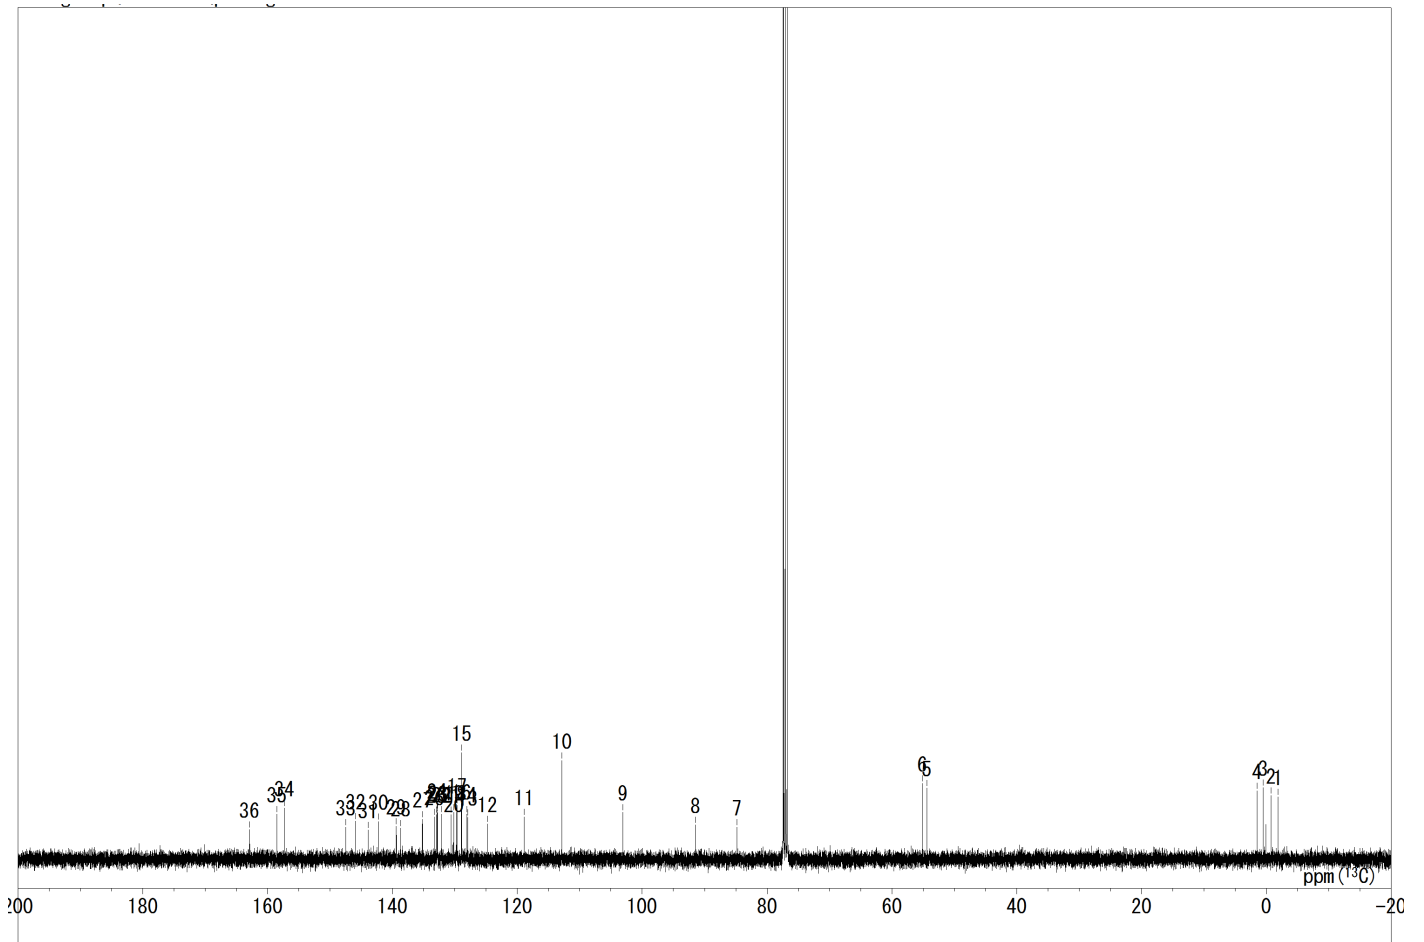

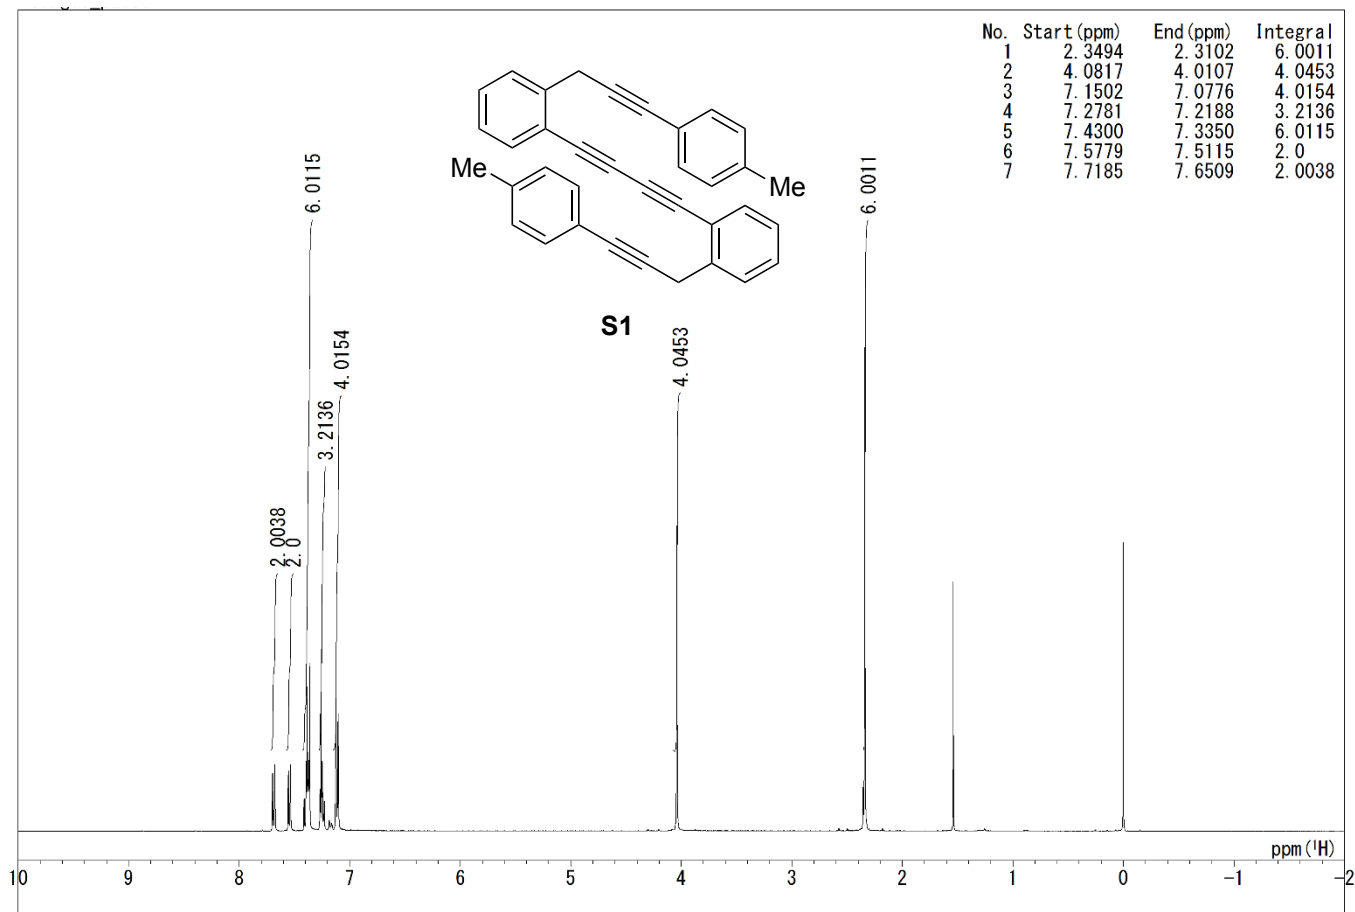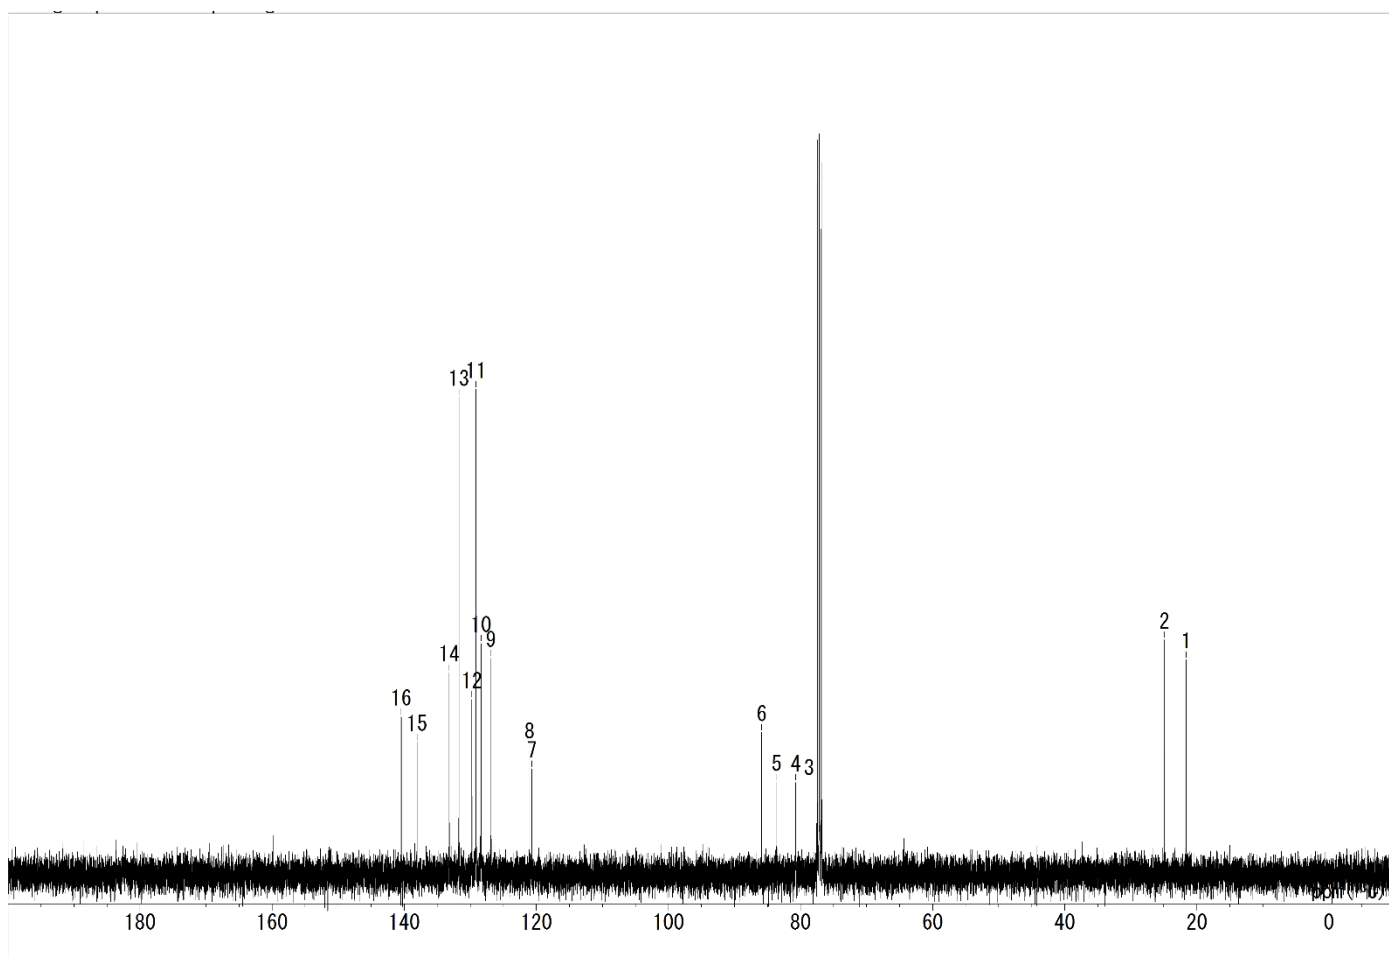

S51

| No. | Start (ppm) | End (ppm) | Integral |
|-----|-------------|-----------|----------|
| 1   | 2.1945      | 2.1404    | 6.0149   |
| 2   | 4.2286      | 4.1666    | 4.0777   |
| 3   | 6.0179      | 5.9408    | 2.0069   |
| 4   | 6.7229      | 6.6462    | 2.0468   |
| 5   | 7.0618      | 6.9902    | 2.0757   |
| 6   | 7.1065      | 7.0618    | 2.0959   |
| 7   | 7.3077      | 7.2590    | 2.0909   |
| 8   | 7.4828      | 7.3809    | 2.062    |
| 9   | 7.9361      | 7.8730    | 2.0498   |
| 10  | 8.1853      | 8.1144    | 2.0      |

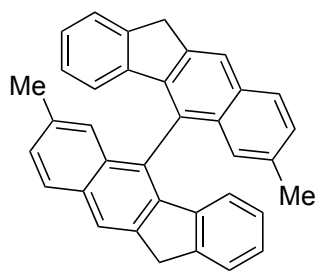

S2

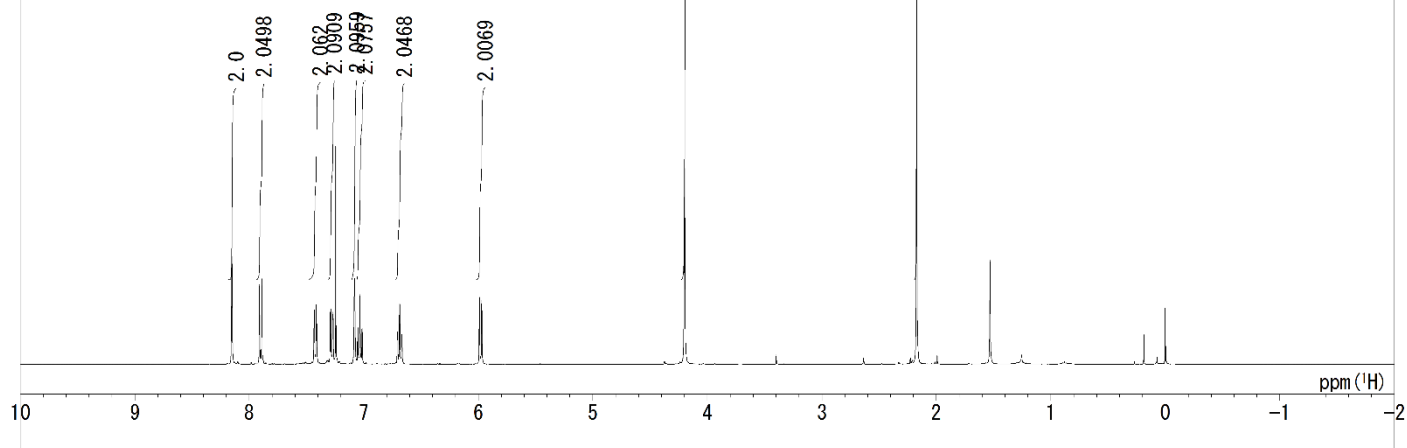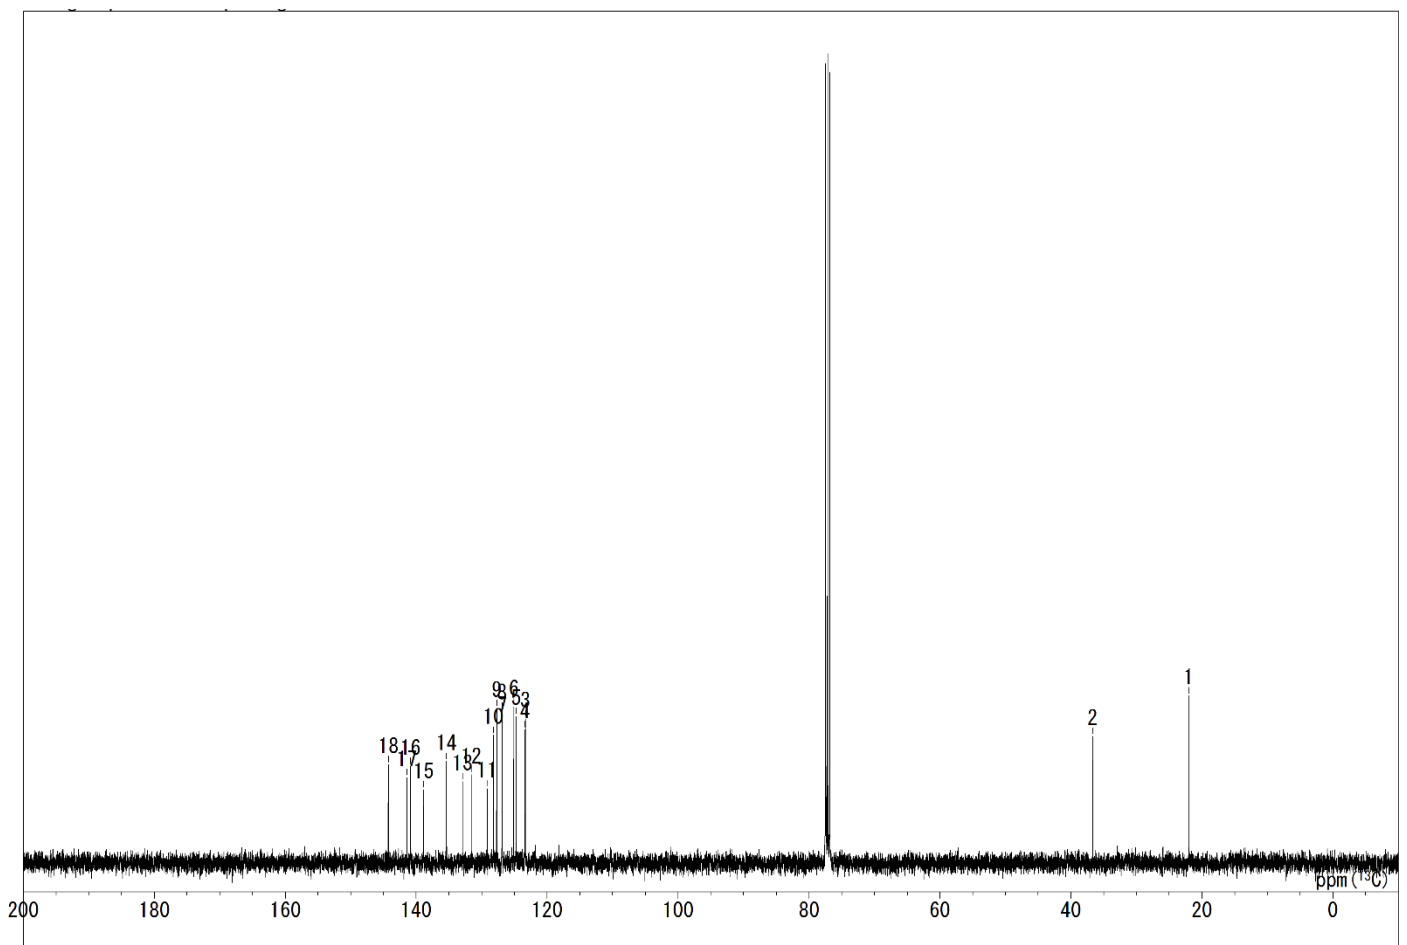

S52
